# Supplementary material
Source: HighWire-hosted journal article supplement (doi:10.1101/rna.051441.115)
Supplement: SuppTableST1.xlsx [file SuppTableST1.xlsx]

## Sheet: Sheet1
Supplementary Table ST1: PAR-CLIP library read and mapping statistics
	adapter removed	unique reads
PAR-CLIP 1	17.8 M	5.9 M (33.4 %)
PAR-CLIP 2	11.8 M	1.8 M (15.3 %)
	unmapped	non-unique	kept	rel. crosslink signal	crosslink signal-to-noise
PAR-CLIP 1	4.7 M (78.5 %)	0.5 M (8.8 %)	0.8 M (12.7 %)	34.0 / 6.3	115.2
PAR-CLIP 2	1.2 M (67.8 %)	0.3 M (16.1 %)	0.3 M (16.1 %)	35.4 / 5.6	56.6
cluster set	libraries	raw stacks	raw stack FDR	raw cluster FDR		best scoring method	filtered clusters	filtered FDR	loss [%]
PAR-CLIP 1	1	289820	0.133	63298		signature_density	62827	0.008	0.007
PAR-CLIP 2	1	169834	0.193	24028		signature_density	23702	0.014	0.014
conservative combination	2	404259	0.174	33123		signature_density	32922	0.006	0.006
