# Supplementary material
Source: HighWire-hosted journal article supplement (doi:10.1101/rna.051441.115)
Supplement: SuppTableST2.xlsx [file SuppTableST2.xlsx]

## Sheet: Sheet1
	Weighted number of clusters				Nucleotide conversion events (T to C )				fraction of length covered by clusters (percent)				nt covered by clusters
Gene		intron	exon	total		intron	exon	total		intron	exon	total		intron	exon	total
EEF2	hits	5.000	21.000	26.000	conv	171	960	1131	density	3.038	6.034	9.073	covered_nt	451	2039	2490
CKB	hits	1.000	8.000	9.000	conv	811	274	1085	density	4.556	5.693	10.249	covered_nt	393	740	1133
ENO1	hits	2.0000	13.0000	15.0000	conv	80	922	1002	density	1.99	9.061	11.051	covered_nt	218	1051	1269
GNB2L1	hits	8.010	3.000	11.010	conv	755.02	63	818.02	density	4.195	4.693	8.888	covered_nt	1016.4	276	1292.4
OAZ1	hits	3.000	3.000	6.000	conv	194	522	716	density	3.953	5.943	9.896	covered_nt	409	694	1103
SNRPB	hits	2.0000	5.0000	7.0000	conv	620	93	713	density	3.237	8.305	11.541	covered_nt	337	362	699
UCHL1	hits	2.000	6.000	8.000	conv	39	586	625	density	0.92	5.943	6.863	covered_nt	93	681	774
ACTG1	hits	1.0090	11.9890	13.0010	conv	16.602	562.399	579.001	density	5.877	12.614	18.492	covered_nt	79.225	1084.78	1164
HNRNPA2B1	hits	3.0000	14.0000	17.0000	conv	178	382	560	density	3.569	7.751	11.32	covered_nt	351	1008	1359
SAT1	hits	2.0100	6.9900	9.0000	conv	42.02	511.98	554	density	3.628	10.396	14.024	covered_nt	97.307	799.693	897
RPS4X	hits	1.000	8.000	9.000	conv	9	535	544	density	1.382	5.812	7.194	covered_nt	60	528	588
MIF	hits	2.000	2.000	4.000	conv	499	41	540	density	7.111	5.084	12.195	covered_nt	391	185	576
TUBA1B	hits	1.000	7.000	8.000	conv	3	516	519	density	1.465	4.881	6.346	covered_nt	35	499	534
NDUFS6	hits	0.000	4.000	4.000	conv	0	507	507	density	0	6.122	6.122	covered_nt	0	377	377
ARF1	hits	0.0400	8.0000	8.0400	conv	0.808	504	504.808	density	0.042	16.13	16.172	covered_nt	4.152	1207	1211.15
STMN1	hits	0.0170	9.9830	10.0000	conv	1.571	498.429	500	density	0.016	14.542	14.558	covered_nt	2.219	899.781	902
GLO1	hits	1.000	15.000	16.000	conv	2	497	499	density	0.121	6.028	6.148	covered_nt	22	1315	1337
SOD1	hits	2.000	6.000	8.000	conv	25	470	495	density	1.183	6.08	7.263	covered_nt	106	644	750
HNRNPAB	hits	2.0000	6.0000	8.0000	conv	389	105	494	density	5.461	7.199	12.659	covered_nt	556	388	944
ALDOA	hits	1.0000	8.0000	9.0000	conv	424	68	492	density	6.424	12.856	19.28	covered_nt	328	437	765
CCT3	hits	0.0000	10.0000	10.0000	conv	0	489	489	density	0	14.439	14.439	covered_nt	0	962	962
RPS16	hits	3.000	5.000	8.000	conv	15	467	482	density	2.808	6.349	9.157	covered_nt	131	476	607
SF1	hits	1.2190	18.7810	20.0000	conv	5.916	469.084	475	density	0.52	21	21.523	covered_nt	40.856	1480.15	1521
GLUL	hits	0.0000	9.9990	9.9990	conv	0	473.001	473.001	density	0	10.644	10.644	covered_nt	0	1404	1404
SHMT2	hits	1.0000	12.9990	13.9990	conv	7	465.999	472.999	density	2.704	23.401	26.103	covered_nt	57	1179	1236
COX8A	hits	0.000	2.000	2.000	conv	0	453	453	density	0	6.638	6.638	covered_nt	0	501	501
TOMM6	hits	2.000	1.000	3.000	conv	60	389	449	density	3.767	5.438	9.205	covered_nt	202	362	564
MYL6	hits	2.0100	2.9900	5.0000	conv	407.109	39.891	447	density	6.234	7.034	13.269	covered_nt	389.426	169.574	559
MCM7	hits	2.0580	13.0000	15.0580	conv	301.568	138	439.568	density	4.555	7.715	12.269	covered_nt	431.51	772	1203.51
GPI	hits	0.0100	17.9900	18.0000	conv	0.02	434.98	435	density	0.002	8.193	8.195	covered_nt	0.475	1362.53	1363
EIF6	hits	2.0060	6.9960	9.0000	conv	324.04	107.959	431.999	density	5.386	11.746	17.132	covered_nt	350.374	472.627	823
TMBIM6	hits	1.0000	13.0000	14.0000	conv	5	426	431	density	0.349	9.245	9.594	covered_nt	52	1448	1500
TIMM13	hits	0.000	6.000	6.000	conv	0	428	428	density	0	5.252	5.252	covered_nt	0	726	726
C17orf76-AS1	hits	1.1030	8.7320	9.8360	conv	16.242	409.087	425.33	density	2.835	50.22	53.053	covered_nt	58.504	831.842	890.349
ATP5B	hits	4.000	12.000	16.000	conv	320	104	424	density	3.444	5.32	8.763	covered_nt	598	718	1316
CNBP	hits	0.0040	11.9940	12.0000	conv	0.02	421.982	422.002	density	0.002	15.872	15.874	covered_nt	0.228	1063.77	1064
SF3B5	hits	0.000	3.000	3.000	conv	0	420	420	density	0	6.249	6.249	covered_nt	0	554	554
BIRC5	hits	1.0040	13.9950	15.0000	conv	2.075	416.926	418.999	density	0.714	13.263	13.978	covered_nt	47.523	1603.48	1651
DCTPP1	hits	0.000	3.000	3.000	conv	0	418	418	density	0	6.34	6.34	covered_nt	0	897	897
MAZ	hits	1.0400	14.9600	16.0000	conv	5.178	411.822	417	density	2.905	9.561	12.466	covered_nt	68.832	1423.17	1492
PPP4C	hits	3.000	8.000	11.000	conv	56	357	413	density	1.875	5.741	7.616	covered_nt	213	699	912
PDE3A	hits	2.0000	0.0000	2.0000	conv	412	0	412	density	0.075	0	0.075	covered_nt	165	0	165
C1orf43	hits	3.0250	10.9760	14.0000	conv	29.217	377.783	407	density	1.611	13.716	15.328	covered_nt	166.19	1247.81	1414
UQCRQ	hits	3.000	2.000	5.000	conv	346	60	406	density	5.977	3.033	9.01	covered_nt	393	114	507
RPL8	hits	3.0200	4.9800	8.0000	conv	124.069	278.931	403	density	7.475	9.065	16.539	covered_nt	423.554	401.446	825
MRPS12	hits	0.0000	3.0000	3.0000	conv	0	402.999	402.999	density	0	14.101	14.101	covered_nt	0	774	774
ATP6V0C	hits	1.0100	5.9900	7.0000	conv	8.02	393.98	402	density	1.561	10.381	11.942	covered_nt	76.446	781.554	858
RPS3	hits	2.000	4.000	6.000	conv	154	245	399	density	2.26	5.032	7.291	covered_nt	202	267	469
COX7A2	hits	1.0000	2.0000	3.0000	conv	19	379	398	density	1.845	8.648	10.493	covered_nt	99	277	376
ANKRD30BL	hits	14.0000	0.0000	14.0000	conv	394	0	394	density	0.867	0	0.867	covered_nt	897	0	897
PRDX1	hits	0.0000	6.0000	6.0000	conv	0	386	386	density	0	16.015	16.015	covered_nt	0	671	671
ACTN4	hits	0.000	14.000	14.000	conv	0	386	386	density	0	4.95	4.95	covered_nt	0	1183	1183
HNRNPUL1	hits	0.0100	16.9900	17.0000	conv	0.02	384.98	385	density	0.001	8.061	8.062	covered_nt	0.287	1212.71	1213
PHB2	hits	2.0000	12.0000	14.0000	conv	15	366	381	density	3.272	10.004	13.276	covered_nt	167	888	1055
TRIM28	hits	4.000	20.000	24.000	conv	87	294	381	density	3.84	5.388	9.228	covered_nt	438	1210	1648
SRSF9	hits	1.000	8.000	9.000	conv	3	378	381	density	0.82	5.734	6.554	covered_nt	53	608	661
CDK4	hits	2.000	6.000	8.000	conv	319	61	380	density	4.369	4.331	8.7	covered_nt	535	383	918
NME1	hits	1.5050	2.4850	3.9900	conv	48.02	329.782	377.802	density	1.589	9.025	10.614	covered_nt	111.728	400.203	511.931
LSM4	hits	1.0100	6.9900	8.0000	conv	309.02	65.98	375	density	3.208	7.083	10.291	covered_nt	618.198	384.802	1003
RPL18	hits	2.000	7.000	9.000	conv	116	259	375	density	2.656	5.998	8.654	covered_nt	170	404	574
HSP90AA1	hits	0.0000	12.0000	12.0000	conv	0	371	371	density	0	6.846	6.846	covered_nt	0	703	703
PFN1	hits	0.000	4.000	4.000	conv	0	366	366	density	0	6.143	6.143	covered_nt	0	563	563
FBL	hits	4.000	7.000	11.000	conv	192	171	363	density	2.14	5.734	7.874	covered_nt	368	609	977
TMPO	hits	0.3140	28.6860	29.0000	conv	3.568	359.431	362.999	density	0.087	11.737	11.823	covered_nt	18.902	1772.1	1791
HDGF	hits	1.0190	10.9800	11.9990	conv	6.078	355.921	362.001	density	0.932	12.634	13.567	covered_nt	55.999	1186	1242
CFL1	hits	0.000	9.000	9.000	conv	0	361	361	density	0	5.681	5.681	covered_nt	0	633	633
CCT7	hits	0.0020	4.9970	4.9990	conv	0.008	359.993	360.001	density	0.001	16.29	16.291	covered_nt	0.102	586.898	587
TMED9	hits	0.000	7.000	7.000	conv	0	359	359	density	0	6.157	6.157	covered_nt	0	981	981
RPS11	hits	4.000	2.000	6.000	conv	336	21	357	density	4.083	4.036	8.119	covered_nt	431	94	525
SNRPD3	hits	1.000	7.000	8.000	conv	21	335	356	density	0.784	4.702	5.487	covered_nt	112	347	459
PSMB2	hits	0.0100	14.9900	15.0000	conv	0.04	349.96	350	density	0.004	9.874	9.878	covered_nt	0.97	1186.03	1187
CCT4	hits	3.000	15.000	18.000	conv	106	239	345	density	1.768	5.332	7.1	covered_nt	438	917	1355
LARP4B	hits	2.000	17.000	19.000	conv	79	265	344	density	0.528	4.454	4.982	covered_nt	312	1180	1492
PKM2	hits	0.0200	10.9760	11.0020	conv	0.05	342.953	343.003	density	0.005	18.919	18.925	covered_nt	0.933	977.064	978.001
HNRNPF	hits	0.0000	16.0020	16.0020	conv	0	343.002	343.002	density	0	18.59	18.59	covered_nt	0	1212	1212
H1FX	hits	0.000	5.000	5.000	conv	0	343	343	density	0	5.619	5.619	covered_nt	0	726	726
STIP1	hits	0.000	7.000	7.000	conv	0	338	338	density	0	4.986	4.986	covered_nt	0	676	676
CALR	hits	1.000	9.000	10.000	conv	18	317	335	density	1.541	5.421	6.961	covered_nt	76	800	876
LDHB	hits	1.0000	10.0000	11.0000	conv	2	331	333	density	0.366	9.496	9.862	covered_nt	57	737	794
ATP5G3	hits	0.0780	10.9210	11.0010	conv	0.942	329.059	330.001	density	0.226	9.389	9.615	covered_nt	4.51	725.491	730.001
PAIP2	hits	3.0000	5.0000	8.0000	conv	26	304	330	density	0.899	9.036	9.936	covered_nt	192	655	847
KDELR1	hits	0.000	9.000	9.000	conv	0	330	330	density	0	6.015	6.015	covered_nt	0	992	992
NONO	hits	1.0100	9.9900	11.0000	conv	2.03	326.97	329	density	0.286	10.813	11.098	covered_nt	30.298	675.702	706
KHSRP	hits	6.000	11.000	17.000	conv	103	224	327	density	3.123	4.858	7.98	covered_nt	652	910	1562
RNF167	hits	1.000	8.000	9.000	conv	14	313	327	density	2.115	5.683	7.798	covered_nt	106	861	967
HMGB2	hits	0.0000	3.9990	3.9990	conv	0	326.001	326.001	density	0	11.709	11.709	covered_nt	0	621	621
PSAP	hits	0.0000	8.0010	8.0010	conv	0	324.999	324.999	density	0	11.855	11.855	covered_nt	0	1228	1228
C14orf2	hits	1.0100	3.9900	5.0000	conv	31.02	292.98	324	density	1.613	9.832	11.446	covered_nt	127.267	453.733	581
PSMD8	hits	1.000	7.000	8.000	conv	2	322	324	density	0.513	5.963	6.475	covered_nt	33	945	978
CANX	hits	1.0000	25.0000	26.0000	conv	2	321	323	density	0.239	8.445	8.684	covered_nt	48	1740	1788
UBB	hits	0.000	5.000	5.000	conv	0	323	323	density	0	4.951	4.951	covered_nt	0	291	291
RANGAP1	hits	1.000	9.000	10.000	conv	33	289	322	density	0.397	5.26	5.657	covered_nt	119	1128	1247
SQSTM1	hits	0.0200	14.9810	14.9990	conv	0.04	321.961	321.999	density	0.004	11.997	12.001	covered_nt	0.902	1298.1	1299
CSTB	hits	2.000	1.000	3.000	conv	315	2	317	density	4.78	2.758	7.538	covered_nt	469	38	507
HN1	hits	2.0010	8.0010	9.9990	conv	42	273.999	315.999	density	1.034	12.749	13.782	covered_nt	144	879	1023
UBE2C	hits	0.0100	6.9900	7.0000	conv	0.1	314.9	315	density	0.037	20.901	20.938	covered_nt	0.95	515.048	515.998
RBM3	hits	4.000	9.000	13.000	conv	99	215	314	density	3.893	4.145	8.038	covered_nt	330	740	1070
WDR83OS	hits	1.000	2.000	3.000	conv	20	293	313	density	4.076	5.679	9.755	covered_nt	115	433	548
CIRBP	hits	0.0000	9.0010	9.0010	conv	0	312	312	density	0	11.467	11.467	covered_nt	0	966	966
HFM1	hits	2.000	0.000	2.000	conv	312	0	312	density	0.331	0	0.331	covered_nt	359	0	359
CD81	hits	0.000	7.000	7.000	conv	0	310	310	density	0	5.655	5.655	covered_nt	0	740	740
ATP6V0B	hits	2.0100	5.9900	8.0000	conv	195.04	112.96	308	density	6.232	8.725	14.958	covered_nt	364.277	391.723	756
PMAIP1	hits	0.000	16.000	16.000	conv	0	307	307	density	0	6.041	6.041	covered_nt	0	1256	1256
NDUFB11	hits	1.0100	2.9900	4.0000	conv	223.722	81.278	305	density	8.132	11.829	19.961	covered_nt	233.426	256.574	490
C1QBP	hits	1.000	10.000	11.000	conv	6	296	302	density	1.053	5.853	6.906	covered_nt	56	661	717
TAGLN2	hits	0.000	7.000	7.000	conv	0	302	302	density	0	5.427	5.427	covered_nt	0	572	572
BSG	hits	2.0060	8.9950	11.0000	conv	12.015	287.986	300.001	density	1.171	13.176	14.347	covered_nt	89.23	1045.77	1135
RPL13	hits	5.0430	8.9960	14.0390	conv	47.136	249.979	297.115	density	9.568	8.861	18.428	covered_nt	282.216	654.901	937.117
ARF5	hits	0.000	5.000	5.000	conv	0	297	297	density	0	6.074	6.074	covered_nt	0	728	728
PPIF	hits	2.000	13.000	15.000	conv	21	275	296	density	1.999	5.883	7.882	covered_nt	170	1277	1447
COX6B1	hits	2.000	2.000	4.000	conv	54	240	294	density	1.708	5.596	7.304	covered_nt	226	280	506
ZNF428	hits	0.000	9.000	9.000	conv	0	292	292	density	0	5.736	5.736	covered_nt	0	730	730
PSMB1	hits	2.000	6.000	8.000	conv	6	285	291	density	0.604	6.168	6.773	covered_nt	90	651	741
PRDX6	hits	0.000	9.000	9.000	conv	0	291	291	density	0	5.73	5.73	covered_nt	0	870	870
SLC1A5	hits	0.0250	13.9750	14.0000	conv	0.113	288.888	289.001	density	0.01	12.836	12.846	covered_nt	0.677	1174.32	1175
DDT	hits	0.0000	1.0000	1.0000	conv	0	287	287	density	0	8.77	8.77	covered_nt	0	257	257
PLK1	hits	1.000	8.000	9.000	conv	8	278	286	density	0.688	5.326	6.015	covered_nt	57	849	906
CCT5	hits	1.000	14.000	15.000	conv	2	284	286	density	0.322	4.557	4.878	covered_nt	32	767	799
ATP5G2	hits	1.0000	4.0000	5.0000	conv	7	277	284	density	1.033	8.818	9.851	covered_nt	89	411	500
CAPNS1	hits	1.0000	6.0000	7.0000	conv	71	212	283	density	2.118	9.203	11.321	covered_nt	192	688	880
UBE2M	hits	1.000	5.000	6.000	conv	2	278	280	density	1.178	4.777	5.956	covered_nt	22	403	425
MRPL4	hits	0.0630	11.9360	12.0000	conv	0.578	279.421	279.999	density	0.131	12.629	12.76	covered_nt	6.239	962.762	969
SPINT2	hits	1.0000	6.0000	7.0000	conv	2	277	279	density	0.133	9.25	9.383	covered_nt	25	812	837
U2AF2	hits	0.0000	13.0000	13.0000	conv	0	279	279	density	0	8.463	8.463	covered_nt	0	1112	1112
MRFAP1	hits	0.000	9.000	9.000	conv	0	278	278	density	0	5.504	5.504	covered_nt	0	681	681
H2AFX	hits	0.000	13.000	13.000	conv	0	275	275	density	0	6.073	6.073	covered_nt	0	1057	1057
RPL36	hits	2.0300	4.9700	7.0000	conv	162.307	111.693	274	density	7.538	10.714	18.252	covered_nt	222.624	399.376	622
DHCR24	hits	0.000	18.000	18.000	conv	0	274	274	density	0	5.013	5.013	covered_nt	0	1341	1341
ASF1B	hits	2.000	8.000	10.000	conv	26	247	273	density	0.842	6.098	6.94	covered_nt	122	1169	1291
CDK1	hits	0.0200	9.9800	10.0000	conv	0.139	271.861	272	density	0.016	12.52	12.536	covered_nt	1.653	1119.35	1121
FUS	hits	2.0000	8.0000	10.0000	conv	230	42	272	density	3.723	5.984	9.707	covered_nt	350	372	722
B2M	hits	2.000	7.000	9.000	conv	86	185	271	density	2.118	5.78	7.898	covered_nt	190	533	723
POLR2E	hits	1.000	6.000	7.000	conv	8	262	270	density	1.27	4.767	6.037	covered_nt	84	752	836
LRRC59	hits	0.000	11.000	11.000	conv	0	270	270	density	0	4.955	4.955	covered_nt	0	875	875
RPL23	hits	1.000	5.000	6.000	conv	33	236	269	density	1.439	5.561	6.999	covered_nt	54	267	321
BRK1	hits	0.000	9.000	9.000	conv	0	268	268	density	0	6.077	6.077	covered_nt	0	783	783
FARSA	hits	1.000	4.000	5.000	conv	10	258	268	density	0.775	4.996	5.771	covered_nt	67	573	640
HNRNPU	hits	0.0000	14.0000	14.0000	conv	0	268	268	density	0	5.698	5.698	covered_nt	0	846	846
EIF4EBP1	hits	1.000	8.000	9.000	conv	6	261	267	density	0.199	6.395	6.594	covered_nt	43	715	758
MDH2	hits	1.000	7.000	8.000	conv	4	263	267	density	0.412	5.315	5.728	covered_nt	57	507	564
AP2S1	hits	3.0000	2.0000	5.0000	conv	53	212	265	density	2.037	8.389	10.425	covered_nt	245	288	533
TUFM	hits	0.000	9.000	9.000	conv	0	265	265	density	0	5.001	5.001	covered_nt	0	643	643
HINT1	hits	0.0200	5.9810	5.9990	conv	0.04	262.961	263.001	density	0.015	13.182	13.197	covered_nt	0.55	512.452	513
MARCKSL1	hits	0.000	6.000	6.000	conv	0	263	263	density	0	5.472	5.472	covered_nt	0	671	671
RBX1	hits	5.000	1.000	6.000	conv	46	216	262	density	1.184	4.594	5.778	covered_nt	264	210	474
SRSF2	hits	0.0000	11.0010	11.0010	conv	0	261.999	261.999	density	0	11.857	11.857	covered_nt	0	996	996
PEBP1	hits	0.000	9.000	9.000	conv	0	261	261	density	0	5.499	5.499	covered_nt	0	660	660
TMEM147	hits	5.0240	3.9760	9.0000	conv	65.462	194.539	260	density	12.385	12.401	24.787	covered_nt	532.776	456.224	989
PSENEN	hits	0.000	6.000	6.000	conv	0	260	260	density	0	6.275	6.275	covered_nt	0	509	509
RAN	hits	0.000	5.000	5.000	conv	0	260	260	density	0	4.706	4.706	covered_nt	0	269	269
ZNFX1-AS1	hits	1.0040	3.9950	5.0010	conv	14.142	245.857	259.998	density	1.31	17.61	18.92	covered_nt	101.347	408.652	509.999
NHP2L1	hits	0.0000	11.0000	11.0000	conv	0	259	259	density	0	10.432	10.432	covered_nt	0	1116	1116
CDKN2A	hits	0.0070	7.9920	7.9990	conv	0.023	257.978	258.001	density	0.001	16.586	16.588	covered_nt	0.252	868.747	868.999
RNASEK	hits	0.7930	4.4320	5.2250	conv	22.823	233.451	256.274	density	4.646	12.568	17.215	covered_nt	71.112	486.957	558.068
TK1	hits	1.000	3.000	4.000	conv	6	249	255	density	0.621	5.725	6.345	covered_nt	62	828	890
ACTB	hits	1.000	12.000	13.000	conv	4	250	254	density	2.327	5.371	7.698	covered_nt	66	732	798
POP7	hits	0.000	5.000	5.000	conv	0	254	254	density	0	6.055	6.055	covered_nt	0	611	611
SMARCD2	hits	1.000	6.000	7.000	conv	2	252	254	density	0.797	5.026	5.822	covered_nt	60	875	935
RPL11	hits	3.0000	4.0000	7.0000	conv	89	164	253	density	4.315	9.213	13.528	covered_nt	278	296	574
RPL27	hits	2.000	4.000	6.000	conv	40	213	253	density	2.354	5.505	7.858	covered_nt	166	218	384
VIM	hits	1.000	11.000	12.000	conv	155	98	253	density	2.585	4.756	7.341	covered_nt	360	556	916
XRCC5	hits	0.000	12.000	12.000	conv	0	253	253	density	0	4.616	4.616	covered_nt	0	807	807
BUB3	hits	1.0400	10.9600	12.0000	conv	2.297	249.703	252	density	0.643	8.904	9.547	covered_nt	44.812	906.188	951
SGTA	hits	1.000	11.000	12.000	conv	91	160	251	density	1.145	5.343	6.488	covered_nt	319	917	1236
CCNB1	hits	2.000	9.000	11.000	conv	26	225	251	density	1.153	4.985	6.138	covered_nt	111	665	776
C17orf81	hits	3.0300	9.9710	13.0010	conv	144.903	105.097	250	density	4.016	14.256	18.273	covered_nt	247.301	716.699	964
PCBP1	hits	0.000	9.000	9.000	conv	0	250	250	density	0	5.482	5.482	covered_nt	0	765	765
RBM42	hits	2.000	11.000	13.000	conv	7	242	249	density	1.197	5.656	6.853	covered_nt	90	816	906
PPP2CA	hits	2.000	16.000	18.000	conv	19	230	249	density	0.568	5.339	5.907	covered_nt	131	1044	1175
RPS21	hits	3.000	3.000	6.000	conv	227	21	248	density	4.953	4.988	9.941	covered_nt	318	122	440
MRPS7	hits	0.000	6.000	6.000	conv	0	248	248	density	0	5.745	5.745	covered_nt	0	745	745
NOP10	hits	0.000	5.000	5.000	conv	0	247	247	density	0	6.3	6.3	covered_nt	0	417	417
RPLP2	hits	0.000	5.000	5.000	conv	0	246	246	density	0	6.261	6.261	covered_nt	0	374	374
CALM3	hits	1.000	11.000	12.000	conv	2	244	246	density	0.594	5.294	5.887	covered_nt	37	864	901
UBE2E1	hits	1.0040	6.9950	8.0010	conv	2.021	242.979	245	density	0.042	11.468	11.51	covered_nt	24.124	680.875	704.999
ATP6V1F	hits	0.0000	6.0000	6.0000	conv	0	244	244	density	0	9.717	9.717	covered_nt	0	434	434
SERBP1	hits	1.0100	23.9900	25.0000	conv	2.04	241.96	244	density	0.234	8.918	9.15	covered_nt	26.228	993.772	1020
PPP1CA	hits	0.0000	6.9990	6.9990	conv	0	243.999	243.999	density	0	12.762	12.762	covered_nt	0	779.001	779.001
SLC3A2	hits	0.0000	8.0000	8.0000	conv	0	243	243	density	0	16.299	16.299	covered_nt	0	889	889
NDUFA2	hits	0.0590	4.9410	5.0000	conv	4.648	238.353	243	density	0.717	12.242	12.959	covered_nt	9.02	541.98	551
UQCRH	hits	3.000	3.000	6.000	conv	51	192	243	density	0.908	5.385	6.294	covered_nt	110	215	325
SNRPD2	hits	0.0000	3.0000	3.0000	conv	0	242	242	density	0	8.992	8.992	covered_nt	0	349	349
PPP2R1A	hits	2.0000	10.0000	12.0000	conv	7	235	242	density	0.364	8.34	8.704	covered_nt	92	836	928
TIMM50	hits	0.000	11.000	11.000	conv	0	242	242	density	0	5.399	5.399	covered_nt	0	1060	1060
CUTA	hits	0.0150	5.9860	6.0010	conv	0.03	240.97	241	density	0.104	17.639	17.742	covered_nt	0.591	527.408	527.999
ID3	hits	0.000	7.000	7.000	conv	0	241	241	density	0	6.115	6.115	covered_nt	0	847	847
EIF4A3	hits	1.000	6.000	7.000	conv	4	237	241	density	0.932	4.788	5.72	covered_nt	93	462	555
GAPDH	hits	0.000	7.000	7.000	conv	0	241	241	density	0	5.332	5.332	covered_nt	0	515	515
SLC25A3	hits	0.0250	8.9750	9.0000	conv	0.148	240.851	240.999	density	0.044	11.947	11.991	covered_nt	2.051	793.949	796
COX7C	hits	0.000	4.000	4.000	conv	0	240	240	density	0	6.56	6.56	covered_nt	0	381	381
DEK	hits	2.0000	15.0000	17.0000	conv	7	231	238	density	0.193	8.774	8.967	covered_nt	52	1124	1176
H2AFZ	hits	2.000	6.000	8.000	conv	36	202	238	density	2.77	5.175	7.945	covered_nt	77	333	410
MCM5	hits	0.000	9.000	9.000	conv	0	238	238	density	0	4.742	4.742	covered_nt	0	656	656
GMNN	hits	0.0200	4.9800	5.0000	conv	0.04	236.961	237.001	density	0.012	13.079	13.093	covered_nt	0.902	395.098	396
CSDE1	hits	0.0000	19.9980	19.9980	conv	0	237	237	density	0	15.325	15.325	covered_nt	0	1179	1179
SRM	hits	1.000	9.000	10.000	conv	40	197	237	density	2.208	6.011	8.219	covered_nt	151	809	960
RNF187	hits	2.000	12.000	14.000	conv	23	214	237	density	1.827	5.049	6.876	covered_nt	145	1006	1151
C19orf10	hits	1.000	6.000	7.000	conv	25	212	237	density	0.709	5.835	6.544	covered_nt	75	590	665
MRPL14	hits	0.000	3.000	3.000	conv	0	237	237	density	0	5.882	5.882	covered_nt	0	450	450
SNHG1	hits	2.030	7.000	9.030	conv	17.099	219	236.099	density	1.905	6.02	7.925	covered_nt	76.396	715	791.396
SIVA1	hits	2.0300	4.9700	7.0000	conv	49.277	186.723	236	density	2.936	10.157	13.093	covered_nt	206.861	475.139	682
EIF5A	hits	1.0000	6.0000	7.0000	conv	15	221	236	density	1.335	11.147	12.482	covered_nt	35	309	344
PSMD3	hits	0.000	13.000	13.000	conv	0	236	236	density	0	5.292	5.292	covered_nt	0	820	820
NDUFA11	hits	1.0440	6.9560	8.0000	conv	17.928	217.071	235	density	1.168	11.059	12.226	covered_nt	83.484	474.516	558
MLF2	hits	1.0000	11.0000	12.0000	conv	41	194	235	density	2.58	9.062	11.643	covered_nt	103	717	820
C19orf48	hits	0.0000	14.0000	14.0000	conv	0	235	235	density	0	10.568	10.568	covered_nt	0	1203	1203
C19orf43	hits	1.000	6.000	7.000	conv	2	233	235	density	1.178	6.239	7.417	covered_nt	40	679	719
HIST1H4C	hits	0.000	4.000	4.000	conv	0	235	235	density	0	6.632	6.632	covered_nt	0	384	384
SSU72	hits	0.000	7.000	7.000	conv	0	235	235	density	0	5.74	5.74	covered_nt	0	684	684
AURKB	hits	2.000	9.000	11.000	conv	154	80	234	density	3.163	5.347	8.51	covered_nt	366	491	857
ZWINT	hits	1.0240	9.9760	11.0000	conv	33.266	199.735	233	density	3.748	11.605	15.353	covered_nt	89.054	697.946	787
H2AFY	hits	2.0000	6.0000	8.0000	conv	5	228	233	density	0.096	13.868	13.964	covered_nt	43	769	812
PARK7	hits	2.0000	4.0000	6.0000	conv	10	223	233	density	0.33	9.092	9.422	covered_nt	55	417	472
UQCR11	hits	1.000	6.000	7.000	conv	93	140	233	density	1.626	5.215	6.842	covered_nt	146	483	629
TMED2	hits	4.000	14.000	18.000	conv	35	197	232	density	1.695	5.939	7.634	covered_nt	257	1284	1541
HSP90AB1	hits	0.000	11.000	11.000	conv	0	231	231	density	0	4.657	4.657	covered_nt	0	615	615
PIN1	hits	0.0050	2.9950	3.0000	conv	1.09	228.911	230	density	0.029	12.079	12.108	covered_nt	2.796	668.203	670.999
POLR2I	hits	6.000	3.000	9.000	conv	202	28	230	density	5.801	4.838	10.639	covered_nt	397	241	638
ATF4	hits	0.0100	11.9900	12.0000	conv	0.079	229.921	230	density	0.089	8.526	8.614	covered_nt	0.446	618.554	619
SSR2	hits	2.000	7.000	9.000	conv	13	217	230	density	1.549	5.976	7.525	covered_nt	208	697	905
FAU	hits	0.000	4.000	4.000	conv	0	230	230	density	0	5.965	5.965	covered_nt	0	354	354
SNHG8	hits	0.0400	3.9610	3.9990	conv	0.784	229.215	229.999	density	0.981	14.337	15.318	covered_nt	5.51	471.49	477
PCNA	hits	1.0000	8.0000	9.0000	conv	2	227	229	density	0.684	8.779	9.462	covered_nt	30	534	564
RNASEH2A	hits	1.000	8.000	9.000	conv	2	227	229	density	0.594	5.664	6.257	covered_nt	30	568	598
GNB1	hits	2.000	15.000	17.000	conv	12	217	229	density	0.144	5.167	5.311	covered_nt	108	1105	1213
TPI1	hits	0.0000	7.9990	7.9990	conv	0	228.999	228.999	density	0	10.613	10.613	covered_nt	0	467.001	467.001
MED10	hits	0.000	6.000	6.000	conv	0	228	228	density	0	6.064	6.064	covered_nt	0	678	678
TUBB4B	hits	0.000	11.000	11.000	conv	0	228	228	density	0	5.342	5.342	covered_nt	0	630	630
PSMB5	hits	0.0100	4.9900	5.0000	conv	0.03	225.969	225.999	density	0.006	11.627	11.633	covered_nt	0.348	490.651	491
MRPS21	hits	0.0200	6.9800	7.0000	conv	0.653	224.347	225	density	0.023	10.596	10.619	covered_nt	2.277	574.723	577
RBBP7	hits	0.0000	9.0000	9.0000	conv	0	225	225	density	0	7.812	7.812	covered_nt	0	564	564
EIF4G2	hits	0.0000	21.0010	21.0010	conv	0	224.999	224.999	density	0	10.412	10.412	covered_nt	0	1184	1184
APRT	hits	3.0100	1.9900	5.0000	conv	25.901	198.099	224	density	5.871	8.094	13.964	covered_nt	229.495	412.505	642
SNRPA	hits	1.000	4.000	5.000	conv	11	212	223	density	0.703	4.96	5.662	covered_nt	81	491	572
PDXP	hits	0.000	13.000	13.000	conv	0	222	222	density	0	5.916	5.916	covered_nt	0	1191	1191
MRPS23	hits	0.000	3.000	3.000	conv	0	222	222	density	0	4.603	4.603	covered_nt	0	348	348
TSC22D3	hits	0.0000	9.0000	9.0000	conv	0	221.001	221.001	density	0	11.751	11.751	covered_nt	0	837	837
CYB5R3	hits	0.0000	9.0000	9.0000	conv	0	221	221	density	0	13.209	13.209	covered_nt	0	789	789
MRPS2	hits	0.000	14.000	14.000	conv	0	221	221	density	0	6.196	6.196	covered_nt	0	1089	1089
HNRNPA0	hits	0.000	13.000	13.000	conv	0	221	221	density	0	5.157	5.157	covered_nt	0	1029	1029
TBCB	hits	0.000	8.000	8.000	conv	0	220	220	density	0	5.394	5.394	covered_nt	0	606	606
ATP5J2	hits	0.0100	3.5820	3.5920	conv	0.838	218.892	219.73	density	0.014	16.506	16.52	covered_nt	0.738	299.3	300.04
EMD	hits	1.000	5.000	6.000	conv	3	216	219	density	2.548	5.505	8.052	covered_nt	46	595	641
ILF2	hits	2.000	6.000	8.000	conv	28	190	218	density	1.733	5.308	7.042	covered_nt	171	623	794
PHGDH	hits	1.000	3.000	4.000	conv	2	216	218	density	0.101	4.61	4.71	covered_nt	22	472	494
ECHS1	hits	2.000	7.000	9.000	conv	14	203	217	density	1.038	5.664	6.701	covered_nt	101	661	762
TPX2	hits	0.000	11.000	11.000	conv	0	217	217	density	0	4.669	4.669	covered_nt	0	895	895
NGFRAP1	hits	0.0000	3.9990	3.9990	conv	0	216.999	216.999	density	0	12.143	12.143	covered_nt	0	431.001	431.001
WDR18	hits	1.000	10.000	11.000	conv	4	212	216	density	0.403	5.578	5.981	covered_nt	28	726	754
ZNF226	hits	4.0960	4.9020	9.0000	conv	13.47	201.528	215	density	2.54	12.377	14.917	covered_nt	203.828	450.172	654
DYNLRB1	hits	0.000	4.000	4.000	conv	0	215	215	density	0	6.224	6.224	covered_nt	0	506	506
HSBP1	hits	0.000	10.000	10.000	conv	0	215	215	density	0	5.611	5.611	covered_nt	0	906	906
PPM1G	hits	1.000	11.000	12.000	conv	15	200	215	density	0.525	4.875	5.401	covered_nt	115	639	754
NCL	hits	0.000	12.000	12.000	conv	0	215	215	density	0	4.856	4.856	covered_nt	0	760	760
RPL32	hits	1.9990	9.0010	11.0000	conv	5.999	209	214.999	density	1.937	10.156	12.096	covered_nt	79	488.999	567.999
HNRNPL	hits	0.0000	7.0000	7.0000	conv	0	214	214	density	0	7.253	7.253	covered_nt	0	453	453
MRPL51	hits	0.000	5.000	5.000	conv	0	212	212	density	0	6.383	6.383	covered_nt	0	559	559
YWHAB	hits	1.0000	14.0000	15.0000	conv	10	201	211	density	0.305	7.658	7.963	covered_nt	44	808	852
C20orf43	hits	0.000	10.000	10.000	conv	0	211	211	density	0	5.698	5.698	covered_nt	0	840	840
AP2M1	hits	1.0000	6.0000	7.0000	conv	2	208	210	density	0.774	8.671	9.445	covered_nt	45	744	789
DAZAP1	hits	0.0000	15.0000	15.0000	conv	0	210	210	density	0	8.907	8.907	covered_nt	0	932	932
UBA52	hits	1.0000	10.0000	11.0000	conv	2	207	209	density	1.647	7.754	9.401	covered_nt	44	767	811
SPCS1	hits	0.000	5.000	5.000	conv	0	209	209	density	0	5.615	5.615	covered_nt	0	521	521
H3F3B	hits	0.000	16.000	16.000	conv	0	209	209	density	0	4.951	4.951	covered_nt	0	810	810
EIF3B	hits	1.0100	6.9900	8.0000	conv	4.683	203.317	208	density	0.265	6.897	7.163	covered_nt	44.109	777.891	822
YARS	hits	2.000	12.000	14.000	conv	7	201	208	density	0.321	4.954	5.275	covered_nt	99	935	1034
DDOST	hits	0.000	12.000	12.000	conv	0	207	207	density	0	5.033	5.033	covered_nt	0	675	675
CDC25B	hits	0.9990	11.0010	12.0000	conv	3	203.001	206.001	density	0.447	9.937	10.384	covered_nt	21.999	969.999	992.001
ATPIF1	hits	0.0830	7.9170	8.0000	conv	0.673	205.328	206	density	0.655	14.012	14.667	covered_nt	7.331	784.668	792
S100A10	hits	0.000	5.000	5.000	conv	0	206	206	density	0	5.656	5.656	covered_nt	0	522	522
RPS24	hits	1.9980	4.0000	5.9980	conv	172.998	31.998	205.002	density	2.142	15.512	17.653	covered_nt	121.002	255.998	377
C7orf59	hits	2.000	2.000	4.000	conv	119	86	205	density	2.998	4.397	7.395	covered_nt	328	123	451
EIF1	hits	1.000	10.000	11.000	conv	3	202	205	density	1.744	5.475	7.219	covered_nt	34	577	611
PSMA7	hits	1.000	5.000	6.000	conv	9	196	205	density	1.189	5.199	6.388	covered_nt	73	352	425
RHOA	hits	0.000	14.000	14.000	conv	0	205	205	density	0	5.862	5.862	covered_nt	0	1099	1099
PRPF19	hits	0.000	8.000	8.000	conv	0	205	205	density	0	5.196	5.196	covered_nt	0	835	835
EWSR1	hits	0.0000	9.0000	9.0000	conv	0	204	204	density	0	10.534	10.534	covered_nt	0	495	495
SUPT5H	hits	1.0000	8.0000	9.0000	conv	8	196	204	density	0.313	10.024	10.336	covered_nt	61	694	755
RPL37A	hits	1.000	4.000	5.000	conv	38	166	204	density	2.039	5.871	7.909	covered_nt	70	241	311
RAB11A	hits	0.0200	10.9800	11.0000	conv	0.208	203.792	204	density	0.008	6.409	6.417	covered_nt	1	808	809
ATP6AP1	hits	0.000	10.000	10.000	conv	0	204	204	density	0	5.426	5.426	covered_nt	0	882	882
ODC1	hits	0.000	6.000	6.000	conv	0	203	203	density	0	4.837	4.837	covered_nt	0	569	569
COPZ1	hits	2.010	15.000	17.010	conv	14.03	188	202.03	density	0.341	5.787	6.128	covered_nt	66.248	1029	1095.25
CCT2	hits	0.0000	13.0000	13.0000	conv	0	202	202	density	0	8.745	8.745	covered_nt	0	815	815
ERH	hits	0.000	7.000	7.000	conv	0	202	202	density	0	6.038	6.038	covered_nt	0	519	519
TMEM85	hits	0.000	6.000	6.000	conv	0	201	201	density	0	5.937	5.937	covered_nt	0	595	595
SNRPF	hits	0.000	7.000	7.000	conv	0	200	200	density	0	5.715	5.715	covered_nt	0	409	409
PCBP2	hits	0.0200	11.9820	12.0000	conv	0.067	199.932	199.999	density	0.007	15.3	15.307	covered_nt	1.014	777.987	778.999
RBM14	hits	0.0380	11.0700	11.1080	conv	0.076	199.767	199.845	density	0.026	8.365	8.391	covered_nt	1.73	792.588	794.318
MRPS34	hits	2.000	6.000	8.000	conv	29	170	199	density	6.926	5.988	12.913	covered_nt	293	627	920
RPS5	hits	1.000	6.000	7.000	conv	89	110	199	density	1.506	5.622	7.128	covered_nt	125	358	483
SF3A1	hits	0.0100	13.9900	14.0000	conv	0.03	198.97	199	density	0.002	7.014	7.016	covered_nt	0.248	1041.75	1042
COMMD4	hits	0.000	4.000	4.000	conv	0	199	199	density	0	5.508	5.508	covered_nt	0	412	412
RPL35	hits	3.000	2.000	5.000	conv	38	160	198	density	2.314	4.779	7.094	covered_nt	144	122	266
MIEN1	hits	0.000	5.000	5.000	conv	0	198	198	density	0	6.224	6.224	covered_nt	0	557	557
FKBP4	hits	0.000	8.000	8.000	conv	0	198	198	density	0	4.273	4.273	covered_nt	0	686	686
DBNDD2	hits	0.0000	5.4000	5.4000	conv	0	197.1	197.1	density	0	22.549	22.549	covered_nt	0	518.4	518.4
NDUFA9	hits	0.000	6.000	6.000	conv	0	197	197	density	0	4.802	4.802	covered_nt	0	433	433
NKIRAS2	hits	0.0060	15.9930	15.9990	conv	0.052	196.947	196.999	density	0.021	16.493	16.515	covered_nt	0.47	1064.53	1065
SCAMP3	hits	0.0000	7.0000	7.0000	conv	0	196	196	density	0	9.04	9.04	covered_nt	0	673	673
RPS19	hits	2.000	3.000	5.000	conv	82	114	196	density	1.251	4.755	6.006	covered_nt	147	221	368
ZNF703	hits	0.000	14.000	14.000	conv	0	196	196	density	0	5.462	5.462	covered_nt	0	937	937
CALM2	hits	0.000	7.000	7.000	conv	0	196	196	density	0	5.236	5.236	covered_nt	0	478	478
TMCO1	hits	0.000	8.000	8.000	conv	0	196	196	density	0	4.109	4.109	covered_nt	0	723	723
FKBP8	hits	0.000	6.000	6.000	conv	0	195	195	density	0	5.092	5.092	covered_nt	0	585	585
PDIA6	hits	0.000	9.000	9.000	conv	0	195	195	density	0	4.889	4.889	covered_nt	0	667	667
NDUFB10	hits	3.000	4.000	7.000	conv	110	84	194	density	4.189	5.284	9.473	covered_nt	304	265	569
SRSF7	hits	0.0100	15.9900	16.0000	conv	0.079	193.921	194	density	0.008	8.695	8.703	covered_nt	0.297	957.703	958
RAE1	hits	0.0000	5.0000	5.0000	conv	0	194	194	density	0	7.912	7.912	covered_nt	0	530	530
PITHD1	hits	0.000	11.000	11.000	conv	0	194	194	density	0	5.735	5.735	covered_nt	0	848	848
NDUFAB1	hits	1.000	3.000	4.000	conv	169	25	194	density	0.993	4.632	5.626	covered_nt	145	159	304
APEX1	hits	0.0000	4.0000	4.0000	conv	0	193	193	density	0	12.647	12.647	covered_nt	0	484	484
SNRPC	hits	0.0100	7.9900	8.0000	conv	0.04	192.96	193	density	0.003	8.465	8.467	covered_nt	0.287	426.713	427
GABARAP	hits	0.000	6.000	6.000	conv	0	193	193	density	0	5.969	5.969	covered_nt	0	551	551
BUD31	hits	0.000	4.000	4.000	conv	0	193	193	density	0	5.332	5.332	covered_nt	0	410	410
PGAM5	hits	0.0400	11.9610	11.9990	conv	0.138	192.863	192.999	density	0.018	11.601	11.619	covered_nt	1.138	956.862	958
SRSF1	hits	0.0200	15.9810	16.0000	conv	0.075	191.926	192	density	0.074	8.831	8.904	covered_nt	0.771	1058.23	1059
TIMM17B	hits	0.0000	8.0000	8.0000	conv	0	191	191	density	0	9.113	9.113	covered_nt	0	461	461
NHP2	hits	0.0100	5.9900	6.0000	conv	0.158	190.842	191	density	0.026	8.937	8.962	covered_nt	0.673	344.327	345
EDF1	hits	2.0100	4.9900	7.0000	conv	37.03	152.97	190	density	3.191	9.779	12.97	covered_nt	213.287	378.713	592
MRPS18A	hits	0.0000	7.0000	7.0000	conv	0	190	190	density	0	9.74	9.74	covered_nt	0	652	652
ERP29	hits	0.0000	7.0000	7.0000	conv	0	190	190	density	0	8.568	8.568	covered_nt	0	518	518
NOLC1	hits	0.000	13.000	13.000	conv	0	190	190	density	0	4.468	4.468	covered_nt	0	832	832
UNG	hits	1.0000	10.0000	11.0000	conv	2	187	189	density	0.31	8.953	9.262	covered_nt	25	893	918
PSMB4	hits	4.000	8.000	12.000	conv	71	117	188	density	4.394	5.735	10.129	covered_nt	290	484	774
TRA2B	hits	1.0100	9.9900	11.0000	conv	22.04	165.96	188	density	0.513	6.423	6.937	covered_nt	75.386	698.614	774
AHSA1	hits	1.000	4.000	5.000	conv	6	182	188	density	0.861	4.817	5.678	covered_nt	82	381	463
SAP18	hits	0.000	9.000	9.000	conv	0	188	188	density	0	4.685	4.685	covered_nt	0	569	569
C20orf24	hits	0.8020	3.1470	3.9490	conv	72.145	115.392	187.537	density	3.152	12.318	15.469	covered_nt	165.879	335.79	501.669
RPL15	hits	0.0540	8.9480	8.9980	conv	0.606	186.394	187	density	0.222	14.132	14.354	covered_nt	3.643	655.358	659.001
UQCR10	hits	1.0100	3.9900	5.0000	conv	13.416	173.584	187	density	2.768	9.118	11.886	covered_nt	67.634	456.366	524
LGALS3BP	hits	0.000	4.000	4.000	conv	0	187	187	density	0	5.089	5.089	covered_nt	0	747	747
ROMO1	hits	2.000	0.000	2.000	conv	187	0	187	density	4.769	0	4.769	covered_nt	318	0	318
RPS29	hits	1.0100	2.9900	4.0000	conv	10.634	175.366	186	density	1.237	8.407	9.643	covered_nt	43.901	166.099	210
CDT1	hits	1.000	12.000	13.000	conv	12	174	186	density	2.121	5.136	7.256	covered_nt	94	914	1008
EIF3I	hits	2.000	10.000	12.000	conv	16	170	186	density	0.945	5.704	6.649	covered_nt	72	746	818
MCM2	hits	0.000	8.000	8.000	conv	0	186	186	density	0	4.722	4.722	covered_nt	0	872	872
KLHDC3	hits	3.9990	9.0000	12.9990	conv	77.001	108	185.001	density	5.921	10.554	16.475	covered_nt	456.999	584.001	1041
PAK4	hits	0.0060	16.9930	16.9990	conv	0.02	184.979	184.999	density	0.002	16.042	16.043	covered_nt	0.424	1095.58	1096
LUC7L2	hits	4.0240	9.4980	13.5220	conv	45.363	138.965	184.329	density	0.674	9.92	10.594	covered_nt	367.194	687.707	1054.9
PCMT1	hits	0.0500	8.9510	9.0010	conv	3.76	180.24	184	density	0.025	19.912	19.939	covered_nt	10.905	844.095	855
TMSB10	hits	1.000	1.000	2.000	conv	176	7	183	density	5.822	3.655	9.477	covered_nt	309	56	365
SNHG15	hits	1.000	6.000	7.000	conv	11	172	183	density	1.988	6.21	8.198	covered_nt	84	587	671
GABARAPL2	hits	1.000	4.000	5.000	conv	45	138	183	density	1.202	5.616	6.819	covered_nt	137	482	619
RPS23	hits	2.000	6.000	8.000	conv	85	98	183	density	2.736	3.179	5.914	covered_nt	101	267	368
RRM1	hits	0.000	7.000	7.000	conv	0	183	183	density	0	4.069	4.069	covered_nt	0	504	504
TSPAN3	hits	0.0100	12.9910	13.0010	conv	0.03	181.971	182.001	density	0.002	8.997	8.999	covered_nt	0.388	791.612	792
ENSA	hits	0.2600	13.7390	13.9990	conv	1.597	180.403	182	density	0.297	22.947	23.243	covered_nt	9.915	798.085	808
RPS19BP1	hits	0.000	3.000	3.000	conv	0	182	182	density	0	5.767	5.767	covered_nt	0	496	496
HBXIP	hits	0.000	5.000	5.000	conv	0	182	182	density	0	5.599	5.599	covered_nt	0	403	403
SIGMAR1	hits	1.0100	7.9900	9.0000	conv	2.02	178.98	181	density	1.872	8.563	10.435	covered_nt	26.307	594.693	621
TOMM22	hits	1.000	8.000	9.000	conv	79	102	181	density	3.714	5.379	9.093	covered_nt	174	560	734
YWHAE	hits	3.0000	8.0000	11.0000	conv	68	113	181	density	0.594	7.462	8.056	covered_nt	246	453	699
GPX4	hits	2.0010	6.9990	9.0000	conv	18	162	180	density	4.451	12.742	17.192	covered_nt	86.001	515.001	600.999
NDUFA7	hits	1.000	2.000	3.000	conv	5	175	180	density	0.599	6.037	6.637	covered_nt	49	379	428
TRAPPC1	hits	0.0000	4.0000	4.0000	conv	0	179	179	density	0	16.062	16.062	covered_nt	0	457	457
LAGE3	hits	0.000	3.000	3.000	conv	0	179	179	density	0	4.585	4.585	covered_nt	0	418	418
APP	hits	1.0020	11.0000	12.0020	conv	11.01	166.992	178.002	density	0.031	19.685	19.718	covered_nt	67.152	1008.85	1076
C11orf10	hits	2.000	2.000	4.000	conv	61	117	178	density	3.201	5.078	8.279	covered_nt	252	135	387
EIF3G	hits	4.000	5.000	9.000	conv	83	95	178	density	3.265	4.872	8.137	covered_nt	326	319	645
LSM7	hits	1.000	2.000	3.000	conv	150	28	178	density	2.456	4.492	6.947	covered_nt	295	112	407
GHITM	hits	0.000	10.000	10.000	conv	0	178	178	density	0	4.864	4.864	covered_nt	0	689	689
ANAPC16	hits	1.0120	7.9920	9.0000	conv	17.034	160.966	177.998	density	0.274	11.768	12.045	covered_nt	32.302	555.696	587.998
CHCHD1	hits	1.000	7.000	8.000	conv	2	175	177	density	2.351	5.752	8.103	covered_nt	31	447	478
PSME3	hits	0.0000	10.0000	10.0000	conv	0	177	177	density	0	7.756	7.756	covered_nt	0	875	875
PSMA2	hits	1.000	8.000	9.000	conv	5	172	177	density	0.308	4.984	5.292	covered_nt	33	449	482
RPL36AL	hits	0.000	3.000	3.000	conv	0	177	177	density	0	5.016	5.016	covered_nt	0	164	164
PNP	hits	0.000	3.000	3.000	conv	0	177	177	density	0	4.557	4.557	covered_nt	0	546	546
CDC37	hits	0.000	7.500	7.500	conv	0	176.5	176.5	density	0	5.4	5.4	covered_nt	0	689.5	689.5
SYNCRIP	hits	0.1450	21.8550	22.0000	conv	1	175.003	176.003	density	0.03	14.603	14.635	covered_nt	6.05	1221.95	1228
SF3B4	hits	0.000	4.000	4.000	conv	0	176	176	density	0	4.444	4.444	covered_nt	0	414	414
PRDX2	hits	0.0000	4.0000	4.0000	conv	0	175	175	density	0	8.609	8.609	covered_nt	0	481	481
VPS25	hits	1.000	4.000	5.000	conv	2	173	175	density	0.887	5.844	6.731	covered_nt	43	622	665
SURF4	hits	0.000	13.000	13.000	conv	0	175	175	density	0	4.919	4.919	covered_nt	0	869	869
SRP14	hits	0.000	8.000	8.000	conv	0	175	175	density	0	4.916	4.916	covered_nt	0	329	329
BAX	hits	1.0790	3.9190	5.0010	conv	110.007	64.992	174.999	density	4.366	12.973	17.339	covered_nt	278.186	373.815	652.001
TMEM93	hits	0.0000	3.0000	3.0000	conv	0	174	174	density	0	10.371	10.371	covered_nt	0	517	517
SEP15	hits	2.0000	6.0000	8.0000	conv	68	106	174	density	0.51	8.089	8.599	covered_nt	194	563	757
GNB2	hits	2.000	4.000	6.000	conv	65	109	174	density	3.279	4.845	8.124	covered_nt	328	462	790
PRELID1	hits	0.000	9.000	9.000	conv	0	174	174	density	0	5.343	5.343	covered_nt	0	472	472
IDH3B	hits	0.0100	2.9890	2.9990	conv	0.831	172.17	173.001	density	0.065	9.503	9.568	covered_nt	2.104	489.896	492
PAF1	hits	1.000	5.000	6.000	conv	5	168	173	density	1.962	4.294	6.256	covered_nt	95	397	492
MRPL54	hits	0.000	6.000	6.000	conv	0	173	173	density	0	6.183	6.183	covered_nt	0	447	447
MRPL38	hits	0.000	10.000	10.000	conv	0	173	173	density	0	5.599	5.599	covered_nt	0	748	748
PNKD	hits	0.0200	2.9800	3.0000	conv	1.683	170.317	172	density	0.006	6.556	6.563	covered_nt	3.297	388.703	392
NDUFB2	hits	2.000	1.000	3.000	conv	129	43	172	density	1.573	4.869	6.442	covered_nt	187	140	327
AKT1S1	hits	0.0000	12.0000	12.0000	conv	0	171.999	171.999	density	0	10.943	10.943	covered_nt	0	705.999	705.999
PFDN5	hits	2.0100	5.9900	8.0000	conv	6.089	164.911	171	density	2.742	10.015	12.758	covered_nt	107.307	385.693	493
OTUB1	hits	0.0000	8.0000	8.0000	conv	0	171	171	density	0	7.736	7.736	covered_nt	0	652	652
CCDC56	hits	0.000	7.000	7.000	conv	0	171	171	density	0	6.242	6.242	covered_nt	0	563	563
DAD1	hits	1.000	3.000	4.000	conv	53	118	171	density	0.312	5.744	6.055	covered_nt	57	367	424
FAM168B	hits	2.000	7.000	9.000	conv	9	162	171	density	0.241	3.522	3.763	covered_nt	73	567	640
ARL6IP4	hits	0.0300	5.9710	6.0010	conv	3.816	166.184	170	density	0.977	12.685	13.663	covered_nt	9.378	590.621	599.999
PRPS1	hits	1.0100	9.9900	11.0000	conv	16.02	153.98	170	density	0.388	8.518	8.906	covered_nt	59.465	706.535	766
C12orf62	hits	0.000	3.000	3.000	conv	0	170	170	density	0	5.828	5.828	covered_nt	0	336	336
SUPT4H1	hits	0.000	13.000	13.000	conv	0	169	169	density	0	5.973	5.973	covered_nt	0	921	921
EIF3D	hits	3.000	7.000	10.000	conv	12	157	169	density	0.745	4.617	5.362	covered_nt	111	459	570
PPIB	hits	0.000	5.000	5.000	conv	0	169	169	density	0	5.355	5.355	covered_nt	0	411	411
RPL28	hits	2.0500	11.9510	14.0010	conv	56.276	111.724	168.001	density	8.392	13.816	22.208	covered_nt	160.537	672.463	833
HAX1	hits	0.0100	8.9900	9.0000	conv	0.089	167.911	168	density	0.036	9.459	9.495	covered_nt	0.574	565.426	566
EBP	hits	0.000	5.000	5.000	conv	0	168	168	density	0	5.744	5.744	covered_nt	0	609	609
COPS6	hits	0.000	5.000	5.000	conv	0	168	168	density	0	5.422	5.422	covered_nt	0	597	597
FAM100B	hits	0.000	6.000	6.000	conv	0	168	168	density	0	5.292	5.292	covered_nt	0	607	607
PUF60	hits	0.0000	6.9990	6.9990	conv	0	167.001	167.001	density	0	9.672	9.672	covered_nt	0	464.001	464.001
MRPL43	hits	0.0920	7.9080	8.0000	conv	4.134	162.866	167	density	0.369	14.864	15.233	covered_nt	15.781	794.219	810
TYMS	hits	1.000	10.000	11.000	conv	4	163	167	density	0.484	5.678	6.161	covered_nt	57	795	852
SLC35A4	hits	0.000	13.000	13.000	conv	0	167	167	density	0	5.168	5.168	covered_nt	0	929	929
CDIPT	hits	0.000	12.000	12.000	conv	0	166	166	density	0	5.673	5.673	covered_nt	0	938	938
PDRG1	hits	0.000	6.000	6.000	conv	0	165	165	density	0	5.776	5.776	covered_nt	0	739	739
XIST	hits	3.000	25.000	28.000	conv	9	156	165	density	0.982	2.942	3.923	covered_nt	125	1288	1413
DMKN	hits	3.0800	7.9190	10.9990	conv	61.539	103.459	164.998	density	1.844	23.003	24.851	covered_nt	144.135	576.864	721.002
GNAS	hits	1.0000	9.0000	10.0000	conv	4	160	164	density	0.162	18.29	18.452	covered_nt	28	703	731
PSMA4	hits	0.0050	7.9950	8.0000	conv	0.01	163.99	164	density	0.003	11.62	11.623	covered_nt	0.179	467.82	467.999
ECH1	hits	0.000	8.000	8.000	conv	0	164	164	density	0	5.599	5.599	covered_nt	0	600	600
SNRPD1	hits	0.000	7.000	7.000	conv	0	164	164	density	0	5.131	5.131	covered_nt	0	545	545
PTP4A1	hits	0.000	11.000	11.000	conv	0	164	164	density	0	3.752	3.752	covered_nt	0	634	634
RCC1	hits	0.6450	13.0020	13.6440	conv	10.089	153	163.089	density	0.396	15.8	16.196	covered_nt	87.636	841.998	929.634
CLTA	hits	0.0020	4.9970	4.9990	conv	0.004	162.998	163.002	density	0.001	18.859	18.86	covered_nt	0.112	539.887	539.998
MTHFD2	hits	0.0000	13.0000	13.0000	conv	0	163	163	density	0	8.478	8.478	covered_nt	0	800	800
FEN1	hits	0.000	4.000	4.000	conv	0	163	163	density	0	4.112	4.112	covered_nt	0	374	374
RPS14	hits	2.0060	3.9960	6.0000	conv	52.029	110.97	162.999	density	3.231	11.034	14.265	covered_nt	160.343	254.656	415.001
PAICS	hits	0.9990	8.0010	9.0000	conv	11.001	152.001	162.999	density	0.291	8.726	9.018	covered_nt	45.999	651	696.999
U2AF1	hits	4.0090	9.9900	13.9990	conv	9.05	152.95	162	density	1.276	12.897	14.171	covered_nt	140.368	547.632	688.001
CERS2	hits	0.0000	13.0000	13.0000	conv	0	162	162	density	0	8.631	8.631	covered_nt	0	955	955
CCNG1	hits	0.0000	14.0000	14.0000	conv	0	162	162	density	0	8.22	8.22	covered_nt	0	787	787
ZMAT2	hits	0.000	9.000	9.000	conv	0	162	162	density	0	5.445	5.445	covered_nt	0	644	644
MAGOH	hits	0.000	2.000	2.000	conv	0	162	162	density	0	4.966	4.966	covered_nt	0	229	229
SNRNP70	hits	0.000	3.000	3.000	conv	0	162	162	density	0	4.662	4.662	covered_nt	0	468	468
POLR2F	hits	1.000	5.000	6.000	conv	17	145	162	density	0.615	3.849	4.464	covered_nt	72	282	354
TOMM5	hits	0.0100	5.9890	5.9990	conv	0.139	160.861	161.001	density	0.029	13.367	13.396	covered_nt	0.701	532.299	533
SSR4	hits	1.0000	3.0000	4.0000	conv	10	151	161	density	1.979	12.962	14.942	covered_nt	54	269	323
CD63	hits	2.0000	6.0000	8.0000	conv	18	143	161	density	3.53	8.134	11.664	covered_nt	128	320	448
MANBAL	hits	0.0000	6.0000	6.0000	conv	0	161	161	density	0	9.475	9.475	covered_nt	0	645	645
GLRX5	hits	0.000	6.000	6.000	conv	0	161	161	density	0	5.68	5.68	covered_nt	0	589	589
MRPL28	hits	0.000	4.000	4.000	conv	0	161	161	density	0	5.582	5.582	covered_nt	0	535	535
SSRP1	hits	0.000	8.000	8.000	conv	0	161	161	density	0	4.698	4.698	covered_nt	0	704	704
PRMT1	hits	1.0000	4.0000	5.0000	conv	9	151	160	density	0.595	12.095	12.69	covered_nt	43	398	441
FBXO7	hits	0.0000	10.0000	10.0000	conv	0	160	160	density	0	8.599	8.599	covered_nt	0	728	728
HN1L	hits	0.000	23.000	23.000	conv	0	160	160	density	0	5.304	5.304	covered_nt	0	1419	1419
FHL1	hits	0.0010	16.0030	16.0040	conv	0.005	158.998	159.003	density	0	21.907	21.907	covered_nt	0.07	991.928	991.998
ASNS	hits	0.0000	4.9980	4.9980	conv	0	159	159	density	0	12.173	12.173	covered_nt	0	373.998	373.998
ATP6V1E1	hits	0.0050	5.9950	6.0000	conv	0.025	158.975	159	density	0.001	10.809	10.81	covered_nt	0.219	453.781	454
ZIC2	hits	0.000	8.000	8.000	conv	0	159	159	density	0	4.728	4.728	covered_nt	0	759	759
DDX24	hits	0.000	7.000	7.000	conv	0	159	159	density	0	4.038	4.038	covered_nt	0	455	455
PTBP1	hits	0.0030	13.9960	13.9990	conv	0.007	158.992	158.999	density	0.002	13.105	13.107	covered_nt	0.173	1023.83	1024
ARPC4	hits	0.0000	11.5760	11.5760	conv	0	158.416	158.416	density	0	15.771	15.771	covered_nt	0	926.852	926.852
PSMA1	hits	3.0010	3.9990	7.0000	conv	8	150	158	density	0.86	9.763	10.623	covered_nt	106.999	479.999	587.001
PFN2	hits	0.0200	9.9800	10.0000	conv	0.495	157.505	158	density	0.075	8.822	8.896	covered_nt	2.267	817.733	820
CHCHD2	hits	0.000	4.000	4.000	conv	0	158	158	density	0	4.961	4.961	covered_nt	0	246	246
NEDD8	hits	0.500	1.980	2.480	conv	2.5	155.446	157.946	density	0.297	5.284	5.58	covered_nt	34	237.624	271.624
DDX56	hits	1.000	5.000	6.000	conv	2	155	157	density	0.435	4.243	4.678	covered_nt	22	446	468
ITM2C	hits	0.0000	9.9990	9.9990	conv	0	156.999	156.999	density	0	11.403	11.403	covered_nt	0	771.999	771.999
HES4	hits	0.0000	6.0000	6.0000	conv	0	156	156	density	0	8.957	8.957	covered_nt	0	426	426
TRAPPC3	hits	2.000	6.000	8.000	conv	11	145	156	density	0.96	5.656	6.616	covered_nt	110	624	734
RPL5	hits	3.000	4.000	7.000	conv	44	112	156	density	1.208	4.429	5.637	covered_nt	116	212	328
PGRMC1	hits	0.000	14.000	14.000	conv	0	156	156	density	0	5.613	5.613	covered_nt	0	919	919
ILF3	hits	0.0290	12.9720	13.0010	conv	0.188	155.811	155.999	density	0.006	9.554	9.56	covered_nt	1.415	784.584	785.999
PPP1CC	hits	1.0590	10.9410	12.0000	conv	6.099	148.901	155	density	0.252	8.712	8.964	covered_nt	38.653	963.347	1002
TSEN34	hits	0.0000	5.0000	5.0000	conv	0	155	155	density	0	7.226	7.226	covered_nt	0	508	508
SNHG13	hits	0.000	8.000	8.000	conv	0	155	155	density	0	6.203	6.203	covered_nt	0	622	622
SSBP1	hits	2.000	3.000	5.000	conv	24	131	155	density	1.009	5.035	6.045	covered_nt	116	200	316
POMP	hits	0.000	7.000	7.000	conv	0	155	155	density	0	5.253	5.253	covered_nt	0	543	543
XRCC6	hits	1.000	12.000	13.000	conv	2	153	155	density	0.145	4.51	4.655	covered_nt	43	465	508
SEC61A1	hits	1.000	10.000	11.000	conv	4	151	155	density	0.205	4.298	4.503	covered_nt	24	679	703
SAE1	hits	2.0030	10.9960	12.9990	conv	7.01	146.991	154.001	density	0.168	12.502	12.67	covered_nt	91.083	758.918	850.001
MAD2L2	hits	0.0000	5.0000	5.0000	conv	0	154	154	density	0	8.992	8.992	covered_nt	0	490	490
SRRT	hits	0.0000	5.0000	5.0000	conv	0	154	154	density	0	8.168	8.168	covered_nt	0	375	375
IMP3	hits	0.000	6.000	6.000	conv	0	154	154	density	0	5.576	5.576	covered_nt	0	579	579
MYBL2	hits	0.000	11.000	11.000	conv	0	154	154	density	0	5.27	5.27	covered_nt	0	1020	1020
CCT8	hits	1.000	8.000	9.000	conv	9	145	154	density	0.376	4.414	4.789	covered_nt	46	385	431
POLR2G	hits	0.000	1.000	1.000	conv	0	154	154	density	0	4.664	4.664	covered_nt	0	204	204
DDX5	hits	0.000	6.000	6.000	conv	0	154	154	density	0	3.862	3.862	covered_nt	0	509	509
DAZAP2	hits	3.0230	8.9770	12.0000	conv	13.361	139.64	153.002	density	3.539	17.466	21.005	covered_nt	106.004	854.994	960.998
UBE2I	hits	1.0000	3.0000	4.0000	conv	6	147	153	density	0.499	9.552	10.051	covered_nt	53	499	552
CEBPG	hits	0.0000	17.0000	17.0000	conv	0	153	153	density	0	7.494	7.494	covered_nt	0	920	920
MCM4	hits	1.0000	11.0000	12.0000	conv	2	151	153	density	0.233	5.824	6.057	covered_nt	22	634	656
CLPP	hits	2.000	4.000	6.000	conv	5	148	153	density	0.804	5.18	5.983	covered_nt	47	406	453
RALY	hits	0.0000	3.0000	3.0000	conv	0	153	153	density	0	4.798	4.798	covered_nt	0	406	406
LAPTM4B	hits	0.000	5.000	5.000	conv	0	153	153	density	0	4.516	4.516	covered_nt	0	490	490
PRPF8	hits	0.000	9.000	9.000	conv	0	153	153	density	0	3.48	3.48	covered_nt	0	741	741
YIF1B	hits	0.0000	7.0000	7.0000	conv	0	152.999	152.999	density	0	14.504	14.504	covered_nt	0	627.998	627.998
YDJC	hits	4.000	7.000	11.000	conv	38	114	152	density	5.432	5.666	11.098	covered_nt	264	666	930
CD59	hits	0.0000	12.0000	12.0000	conv	0	152	152	density	0	9.293	9.293	covered_nt	0	760	760
PRMT5	hits	0.0000	13.0000	13.0000	conv	0	152	152	density	0	8.371	8.371	covered_nt	0	835	835
PTGES3	hits	1.000	10.000	11.000	conv	13	139	152	density	0.177	4.944	5.121	covered_nt	30	571	601
VCP	hits	0.000	13.000	13.000	conv	0	152	152	density	0	4.571	4.571	covered_nt	0	879	879
CDCA3	hits	2.000	4.000	6.000	conv	10	141	151	density	3.443	5.053	8.496	covered_nt	130	377	507
HIGD2A	hits	0.000	5.000	5.000	conv	0	151	151	density	0	6.197	6.197	covered_nt	0	443	443
HSPBP1	hits	0.0000	11.0000	11.0000	conv	0	150	150	density	0	9.213	9.213	covered_nt	0	866	866
RPS6	hits	4.000	6.000	10.000	conv	32	118	150	density	2.901	5.182	8.083	covered_nt	204	293	497
MRPS26	hits	0.000	4.000	4.000	conv	0	150	150	density	0	5.849	5.849	covered_nt	0	589	589
VAMP8	hits	0.000	2.000	2.000	conv	0	150	150	density	0	5.553	5.553	covered_nt	0	357	357
CNN3	hits	0.000	7.000	7.000	conv	0	150	150	density	0	5.316	5.316	covered_nt	0	803	803
C6orf108	hits	0.0100	3.9900	4.0000	conv	1.317	147.683	149	density	0.202	9.934	10.136	covered_nt	4.812	645.188	650
BCL2L12	hits	1.0000	3.0000	4.0000	conv	136	13	149	density	2.999	4.962	7.961	covered_nt	253	170	423
PRDX4	hits	1.000	5.000	6.000	conv	90	59	149	density	0.675	5.537	6.212	covered_nt	107	419	526
POLR2L	hits	0.000	6.000	6.000	conv	0	149	149	density	0	6.032	6.032	covered_nt	0	565	565
EIF3K	hits	0.000	9.000	9.000	conv	0	149	149	density	0	6.027	6.027	covered_nt	0	565	565
SLC39A1	hits	0.000	16.000	16.000	conv	0	149	149	density	0	5.309	5.309	covered_nt	0	938	938
PDCD6	hits	0.000	5.882	5.882	conv	0	148.039	148.039	density	0	5.634	5.634	covered_nt	0	552.941	552.941
WARS	hits	1.0000	11.0000	12.0000	conv	6	142	148	density	0.215	12.543	12.759	covered_nt	60	836	896
SCAND1	hits	0.0000	5.0000	5.0000	conv	0	148	148	density	0	9.156	9.156	covered_nt	0	509	509
CLTB	hits	0.0000	6.0000	6.0000	conv	0	148	148	density	0	8.84	8.84	covered_nt	0	473	473
PLEKHJ1	hits	1.000	9.000	10.000	conv	18	130	148	density	2.548	5.81	8.358	covered_nt	95	670	765
MEA1	hits	0.000	5.000	5.000	conv	0	148	148	density	0	5.638	5.638	covered_nt	0	423	423
PRCC	hits	0.000	12.000	12.000	conv	0	148	148	density	0	5.38	5.38	covered_nt	0	863	863
CD164	hits	0.0220	13.9770	14.0000	conv	0.153	146.847	147	density	0.013	14.431	14.444	covered_nt	1.218	911.783	913.001
RPL35A	hits	3.000	6.000	9.000	conv	17	130	147	density	1.786	6.302	8.088	covered_nt	127	377	504
MRPL24	hits	0.0000	3.0000	3.0000	conv	0	147	147	density	0	7.917	7.917	covered_nt	0	264	264
GADD45GIP1	hits	0.000	8.000	8.000	conv	0	147	147	density	0	6.365	6.365	covered_nt	0	606	606
TXN2	hits	0.000	8.000	8.000	conv	0	147	147	density	0	5.984	5.984	covered_nt	0	833	833
JAGN1	hits	0.000	7.000	7.000	conv	0	147	147	density	0	5.4	5.4	covered_nt	0	684	684
REEP4	hits	0.000	5.000	5.000	conv	0	147	147	density	0	5.046	5.046	covered_nt	0	543	543
HSD17B10	hits	1.0000	4.0000	5.0000	conv	24	122	146	density	3.587	9.244	12.83	covered_nt	107	449	556
RPL38	hits	1.0000	4.0000	5.0000	conv	42	104	146	density	1.768	9.538	11.306	covered_nt	99	197	296
FAM127B	hits	0.0500	9.9500	10.0000	conv	0.693	145.307	146	density	0.644	9.804	10.448	covered_nt	3.089	627.911	631
RPLP1	hits	0.0100	3.9900	4.0000	conv	0.426	145.574	146	density	0.026	9.596	9.622	covered_nt	0.416	257.584	258
KIAA0101	hits	2.0000	4.0000	6.0000	conv	6	140	146	density	0.768	8.408	9.175	covered_nt	92	489	581
JTB	hits	1.000	8.000	9.000	conv	4	142	146	density	2.262	5.51	7.772	covered_nt	81	702	783
SAR1A	hits	0.0000	11.0000	11.0000	conv	0	146	146	density	0	7.278	7.278	covered_nt	0	696	696
POLR1D	hits	0.0980	5.9020	6.0000	conv	2.804	143.196	146	density	0.02	6.758	6.778	covered_nt	6.216	338.784	345
TKT	hits	2.0100	5.9900	8.0000	conv	23.03	122.97	146	density	0.598	6.001	6.599	covered_nt	130.792	388.208	519
LMAN2	hits	0.000	8.000	8.000	conv	0	146	146	density	0	5.41	5.41	covered_nt	0	761	761
ATP6V0D1	hits	0.000	7.000	7.000	conv	0	146	146	density	0	5.348	5.348	covered_nt	0	664	664
SNHG7	hits	0.0100	5.9900	6.0000	conv	0.109	145.89	145.999	density	0.036	10.338	10.374	covered_nt	0.693	412.308	413.001
EIF4A1	hits	0.0000	6.0000	6.0000	conv	0	145.334	145.334	density	0	6.866	6.866	covered_nt	0	362	362
LDHA	hits	0.0100	9.9910	10.0010	conv	0.222	144.779	145	density	0.007	12.905	12.912	covered_nt	0.559	443.443	444
POP4	hits	0.0300	11.9700	12.0000	conv	0.109	144.891	145	density	0.023	7.516	7.539	covered_nt	1.356	635.644	637
C5orf32	hits	0.000	3.000	3.000	conv	0	145	145	density	0	5.849	5.849	covered_nt	0	516	516
RPA2	hits	1.000	3.000	4.000	conv	6	139	145	density	0.318	5.05	5.368	covered_nt	53	553	606
TAF7	hits	0.000	4.000	4.000	conv	0	145	145	density	0	4.603	4.603	covered_nt	0	535	535
AATF	hits	0.000	6.000	6.000	conv	0	145	145	density	0	4.151	4.151	covered_nt	0	359	359
CAPZB	hits	2.0010	9.9990	12.0000	conv	6.999	137.001	144	density	0.057	11.68	11.737	covered_nt	57	777	834
CCDC124	hits	0.0000	6.0000	6.0000	conv	0	144	144	density	0	9.388	9.388	covered_nt	0	507	507
CDK2	hits	0.0100	13.9900	14.0000	conv	0.109	143.891	144	density	0.024	8.463	8.487	covered_nt	0.653	800.347	801
AKR7A2	hits	0.000	6.000	6.000	conv	0	144	144	density	0	4.317	4.317	covered_nt	0	496	496
SERF2	hits	0.0690	5.7660	5.8380	conv	0.484	143.509	143.992	density	0.284	10.209	10.494	covered_nt	3.169	434.387	437.554
HOXA9	hits	0.000	7.970	7.970	conv	0	143.792	143.792	density	0	4.602	4.602	covered_nt	0	479.114	479.114
PIGY	hits	0.0000	10.0000	10.0000	conv	0	143	143	density	0	9.104	9.104	covered_nt	0	608	608
PNPLA2	hits	0.000	8.000	8.000	conv	0	143	143	density	0	4.707	4.707	covered_nt	0	610	610
RNH1	hits	0.0080	4.9920	5.0000	conv	0.02	141.98	142	density	0.004	15.912	15.916	covered_nt	0.404	451.596	452
H2AFV	hits	3.0110	9.9890	13.0000	conv	30.16	111.841	142	density	1.213	14.163	15.377	covered_nt	162.835	677.164	840
ATP5D	hits	2.0400	5.9600	8.0000	conv	11.02	130.98	142	density	2.875	8.834	11.708	covered_nt	76.01	451.99	528
DPM3	hits	0.0000	3.0000	3.0000	conv	0	142	142	density	0	10.376	10.376	covered_nt	0	317	317
COX5B	hits	1.000	4.000	5.000	conv	16	126	142	density	2.997	5.928	8.925	covered_nt	114	303	417
PRKCSH	hits	3.0000	5.0000	8.0000	conv	86	56	142	density	2.743	5.457	8.2	covered_nt	421	254	675
EZR	hits	0.0000	11.0000	11.0000	conv	0	142	142	density	0	8.001	8.001	covered_nt	0	940	940
ELOF1	hits	0.000	9.000	9.000	conv	0	142	142	density	0	6.154	6.154	covered_nt	0	716	716
TXNL4A	hits	1.000	7.000	8.000	conv	5	137	142	density	0.499	5.483	5.982	covered_nt	59	607	666
ARL6IP1	hits	0.000	8.000	8.000	conv	0	142	142	density	0	5.098	5.098	covered_nt	0	753	753
CD9	hits	0.000	5.000	5.000	conv	0	142	142	density	0	4.693	4.693	covered_nt	0	327	327
ATP1A1	hits	0.0000	6.0000	6.0000	conv	0	141.999	141.999	density	0	8.406	8.406	covered_nt	0	662.001	662.001
HNRNPK	hits	0.0050	8.9950	9.0000	conv	0.07	140.931	141.001	density	0.005	7.5	7.504	covered_nt	0.308	413.691	414
RHOC	hits	0.9990	5.0010	6.0000	conv	2.001	138.999	141	density	1.749	11.462	13.212	covered_nt	72	528	600
USF2	hits	0.0000	7.0000	7.0000	conv	0	141	141	density	0	8.611	8.611	covered_nt	0	603	603
SNAPIN	hits	0.000	9.000	9.000	conv	0	141	141	density	0	6.177	6.177	covered_nt	0	739	739
CYC1	hits	0.000	9.000	9.000	conv	0	141	141	density	0	5.559	5.559	covered_nt	0	559	559
TRIP6	hits	1.000	7.000	8.000	conv	4	137	141	density	0.693	4.853	5.546	covered_nt	27	489	516
STRAP	hits	0.000	9.000	9.000	conv	0	141	141	density	0	4.96	4.96	covered_nt	0	574	574
SRPRB	hits	0.000	15.000	15.000	conv	0	141	141	density	0	4.944	4.944	covered_nt	0	842	842
EIF4G1	hits	0.0020	13.9980	14.0000	conv	0.008	139.994	140.002	density	0	11.969	11.97	covered_nt	0.048	854.953	855.001
NME2	hits	0.0380	4.4660	4.5050	conv	0.839	139.162	140.001	density	0.153	15.652	15.806	covered_nt	5.202	348.525	353.727
LMNB1	hits	1.0000	7.0000	8.0000	conv	9	131	140	density	0.181	6.398	6.578	covered_nt	74	452	526
DHX15	hits	1.000	12.000	13.000	conv	2	138	140	density	0.123	4.378	4.501	covered_nt	48	597	645
PEF1	hits	0.0100	11.9890	11.9990	conv	0.035	138.966	139.001	density	0.005	12.106	12.111	covered_nt	0.458	844.542	845
URM1	hits	1.0000	10.0000	11.0000	conv	2	137	139	density	0.291	9.386	9.677	covered_nt	38	765	803
STRA13	hits	6.000	2.000	8.000	conv	43	96	139	density	3.297	5.75	9.047	covered_nt	306	386	692
GRAMD1A	hits	0.0000	6.0000	6.0000	conv	0	139	139	density	0	6.575	6.575	covered_nt	0	460	460
TMEM208	hits	0.000	6.000	6.000	conv	0	139	139	density	0	5.757	5.757	covered_nt	0	422	422
SUMO3	hits	0.000	12.000	12.000	conv	0	139	139	density	0	5.343	5.343	covered_nt	0	716	716
RAB7A	hits	0.000	10.000	10.000	conv	0	139	139	density	0	5.234	5.234	covered_nt	0	818	818
MYL12A	hits	0.000	3.000	3.000	conv	0	139	139	density	0	4.6	4.6	covered_nt	0	286	286
MARCKS	hits	0.000	5.000	5.000	conv	0	139	139	density	0	3.51	3.51	covered_nt	0	446	446
UBE2A	hits	0.0050	12.9950	13.0000	conv	0.015	137.985	138	density	0.002	10.534	10.536	covered_nt	0.119	625.881	626.001
SEPT2	hits	1.0000	8.0000	9.0000	conv	5	133	138	density	0.106	8.831	8.936	covered_nt	26	499	525
NACA	hits	0.9990	3.9990	5.0010	conv	95.001	42.999	138	density	0.613	7.109	7.722	covered_nt	51	186	237
PPP2R2A	hits	0.0000	13.0000	13.0000	conv	0	138	138	density	0	6.615	6.615	covered_nt	0	677	677
TTC1	hits	0.000	4.000	4.000	conv	0	138	138	density	0	5.518	5.518	covered_nt	0	631	631
GSK3A	hits	0.000	10.000	10.000	conv	0	138	138	density	0	5.31	5.31	covered_nt	0	843	843
PERP	hits	0.000	10.000	10.000	conv	0	138	138	density	0	4.432	4.432	covered_nt	0	886	886
COASY	hits	1.0300	5.9700	7.0000	conv	6.102	131.896	137.998	density	3.71	12.42	16.13	covered_nt	64.888	519.114	584.002
HNRNPD	hits	1.0100	7.9900	9.0000	conv	2.08	134.92	137	density	0.295	11.281	11.575	covered_nt	38.882	529.118	568
GPS1	hits	1.0000	9.0000	10.0000	conv	3	134	137	density	1.776	7.741	9.517	covered_nt	59	570	629
LAMP1	hits	0.000	7.000	7.000	conv	0	137	137	density	0	4.957	4.957	covered_nt	0	764	764
ZSCAN18	hits	0.0000	9.0000	9.0000	conv	0	136	136	density	0	11.897	11.897	covered_nt	0	710	710
TXNRD1	hits	0.0000	14.0000	14.0000	conv	0	136	136	density	0	11.706	11.706	covered_nt	0	763	763
PRDX3	hits	0.0000	11.0000	11.0000	conv	0	136	136	density	0	9.356	9.356	covered_nt	0	770	770
PSMB6	hits	2.000	5.000	7.000	conv	40	96	136	density	3.949	5.363	9.312	covered_nt	218	332	550
STOML2	hits	2.000	5.000	7.000	conv	110	26	136	density	4.132	4.457	8.589	covered_nt	329	268	597
C1orf122	hits	0.0000	3.0000	3.0000	conv	0	136	136	density	0	8.525	8.525	covered_nt	0	455	455
RPL29	hits	2.000	2.000	4.000	conv	64	72	136	density	3.907	4.131	8.038	covered_nt	227	115	342
CENPV	hits	2.000	6.000	8.000	conv	10	126	136	density	1.029	5.296	6.325	covered_nt	102	446	548
METTL11A	hits	0.000	7.000	7.000	conv	0	136	136	density	0	6.007	6.007	covered_nt	0	635	635
HSP90B1	hits	0.000	4.500	4.500	conv	0	136	136	density	0	3.326	3.326	covered_nt	0	251	251
COPS7A	hits	1.0000	9.0000	10.0000	conv	3	132	135	density	0.888	13.386	14.273	covered_nt	39	703	742
AURKA	hits	1.0020	6.0000	7.0020	conv	4.002	130.998	135	density	0.228	12.559	12.785	covered_nt	33	442.998	475.998
CNPY2	hits	0.0300	7.9700	8.0000	conv	0.535	134.465	135	density	0.108	10.23	10.338	covered_nt	3.644	791.356	795
NGRN	hits	0.0300	9.9700	10.0000	conv	0.832	134.168	135	density	0.116	8.332	8.448	covered_nt	4.337	674.663	679
PSMB3	hits	1.000	7.000	8.000	conv	30	105	135	density	1.012	6.022	7.034	covered_nt	109	483	592
LAMTOR1	hits	1.000	8.000	9.000	conv	3	132	135	density	0.687	5.516	6.203	covered_nt	30	528	558
NPM3	hits	0.000	6.000	6.000	conv	0	135	135	density	0	5.698	5.698	covered_nt	0	447	447
STUB1	hits	0.000	7.000	7.000	conv	0	135	135	density	0	5.285	5.285	covered_nt	0	609	609
EID1	hits	0.000	4.000	4.000	conv	0	135	135	density	0	4.414	4.414	covered_nt	0	425	425
PMF1	hits	0.0040	5.7690	5.7740	conv	0.027	134.549	134.575	density	0.002	11.833	11.835	covered_nt	0.229	477.118	477.347
GEMIN7	hits	0.0000	6.0000	6.0000	conv	0	134.001	134.001	density	0	10.65	10.65	covered_nt	0	507	507
PSMG1	hits	0.0000	6.0000	6.0000	conv	0	134	134	density	0	7.949	7.949	covered_nt	0	323	323
UBA1	hits	0.0000	6.0000	6.0000	conv	0	134	134	density	0	6.177	6.177	covered_nt	0	535	535
ATP6V0E1	hits	0.000	5.000	5.000	conv	0	134	134	density	0	5.986	5.986	covered_nt	0	551	551
MRPL41	hits	0.000	4.000	4.000	conv	0	134	134	density	0	5.942	5.942	covered_nt	0	366	366
INO80E	hits	0.000	8.000	8.000	conv	0	134	134	density	0	5.731	5.731	covered_nt	0	618	618
ARF3	hits	0.000	12.000	12.000	conv	0	134	134	density	0	4.602	4.602	covered_nt	0	824	824
NUCKS1	hits	0.000	19.000	19.000	conv	0	134	134	density	0	4.197	4.197	covered_nt	0	1121	1121
TMEM205	hits	1.0190	4.9800	5.9990	conv	5.157	127.843	133	density	2.216	10.607	12.823	covered_nt	50.451	326.55	376.999
MYEOV2	hits	1.0100	0.9900	2.0000	conv	12.208	120.792	133	density	1.329	5.811	7.14	covered_nt	77.465	246.535	324
HNRNPM	hits	0.0000	6.0000	6.0000	conv	0	133	133	density	0	6.543	6.543	covered_nt	0	429	429
ITM2B	hits	0.000	13.000	13.000	conv	0	133	133	density	0	5.465	5.465	covered_nt	0	819	819
CDCA8	hits	0.000	11.000	11.000	conv	0	133	133	density	0	5.074	5.074	covered_nt	0	753	753
PGD	hits	0.000	8.000	8.000	conv	0	133	133	density	0	4.859	4.859	covered_nt	0	543	543
SFXN1	hits	0.000	10.000	10.000	conv	0	133	133	density	0	4.375	4.375	covered_nt	0	591	591
ATP5G1	hits	1.0000	4.0000	5.0000	conv	107	25	132	density	4.791	8.083	12.875	covered_nt	211	189	400
BCAP31	hits	0.0000	5.0000	5.0000	conv	0	132	132	density	0	12.787	12.787	covered_nt	0	504	504
SNX3	hits	1.0100	5.9900	7.0000	conv	6.03	125.97	132	density	0.177	8.768	8.945	covered_nt	61.277	563.723	625
C16orf80	hits	0.000	5.000	5.000	conv	0	132	132	density	0	5.288	5.288	covered_nt	0	492	492
KRT10	hits	0.000	5.000	5.000	conv	0	132	132	density	0	4.057	4.057	covered_nt	0	335	335
SMC1A	hits	0.000	14.000	14.000	conv	0	132	132	density	0	3.14	3.14	covered_nt	0	760	760
GPX1	hits	0.0100	6.9900	7.0000	conv	0.02	130.98	131	density	0.118	8.105	8.223	covered_nt	0.238	323.762	324
FDFT1	hits	4.000	5.000	9.000	conv	9	122	131	density	0.558	5.019	5.577	covered_nt	163	662	825
USP11	hits	0.000	8.000	8.000	conv	0	131	131	density	0	4.443	4.443	covered_nt	0	683	683
FTH1	hits	0.000	5.000	5.000	conv	0	131	131	density	0	3.791	3.791	covered_nt	0	158	158
MTFP1	hits	1.0200	8.9800	10.0000	conv	15.149	114.851	130	density	2.3	9.27	11.57	covered_nt	55.307	566.693	622
SYF2	hits	0.0000	5.0000	5.0000	conv	0	130	130	density	0	7.753	7.753	covered_nt	0	469	469
MRPL23	hits	1.000	9.000	10.000	conv	23	107	130	density	0.949	5.686	6.635	covered_nt	80	375	455
TMEM101	hits	0.000	8.000	8.000	conv	0	130	130	density	0	5.816	5.816	covered_nt	0	852	852
SMG9	hits	0.000	7.000	7.000	conv	0	130	130	density	0	4.762	4.762	covered_nt	0	615	615
ZNF207	hits	0.0000	12.9990	12.9990	conv	0	129.999	129.999	density	0	10.214	10.214	covered_nt	0	654.999	654.999
SLC25A5	hits	1.000	7.000	8.000	conv	11	118	129	density	2.117	4.996	7.114	covered_nt	55	418	473
NDUFA13	hits	2.000	2.000	4.000	conv	22	107	129	density	1.07	5.486	6.557	covered_nt	126	238	364
NDUFS7	hits	0.000	6.000	6.000	conv	0	129	129	density	0	5.741	5.741	covered_nt	0	413	413
RRAGA	hits	0.000	5.000	5.000	conv	0	129	129	density	0	4.896	4.896	covered_nt	0	475	475
POLDIP2	hits	0.000	10.000	10.000	conv	0	129	129	density	0	4.795	4.795	covered_nt	0	728	728
SUB1	hits	0.000	10.000	10.000	conv	0	129	129	density	0	4.369	4.369	covered_nt	0	690	690
MLX	hits	0.0000	9.0000	9.0000	conv	0	128.001	128.001	density	0	10.591	10.591	covered_nt	0	767.001	767.001
TRIAP1	hits	0.000	8.000	8.000	conv	0	128	128	density	0	5.669	5.669	covered_nt	0	590	590
DNTTIP1	hits	0.000	2.000	2.000	conv	0	128	128	density	0	4.353	4.353	covered_nt	0	251	251
HDAC2	hits	1.0000	6.0000	7.0000	conv	2	126	128	density	0.164	4.121	4.283	covered_nt	33	423	456
SF3B3	hits	0.000	7.000	7.000	conv	0	128	128	density	0	2.94	2.94	covered_nt	0	649	649
MRPS14	hits	3.0000	4.0000	7.0000	conv	14	113	127	density	2.068	6.634	8.702	covered_nt	174	393	567
XBP1	hits	0.0100	8.9900	9.0000	conv	0.069	126.931	127	density	0.032	8.256	8.288	covered_nt	0.941	603.059	604
SMARCB1	hits	0.0000	6.0000	6.0000	conv	0	127	127	density	0	8.078	8.078	covered_nt	0	522	522
AP1M1	hits	0.0000	12.0000	12.0000	conv	0	127	127	density	0	7.887	7.887	covered_nt	0	683	683
POLR2C	hits	0.000	10.000	10.000	conv	0	127	127	density	0	5.475	5.475	covered_nt	0	785	785
SRP9	hits	1.0000	3.0000	4.0000	conv	3	124	127	density	0.296	4.999	5.295	covered_nt	24	145	169
RPA1	hits	1.000	7.000	8.000	conv	2	125	127	density	0.111	3.921	4.032	covered_nt	52	615	667
CYB5B	hits	0.000	7.000	7.000	conv	0	127	127	density	0	3.942	3.942	covered_nt	0	616	616
RANGRF	hits	0.0350	9.9660	10.0000	conv	0.364	125.636	126	density	0.873	13.111	13.985	covered_nt	3.386	657.614	661
HM13	hits	0.9990	6.0000	6.9990	conv	9.999	116.001	126	density	0.081	10.139	10.22	covered_nt	30	483	513
PSMD13	hits	0.0100	7.9900	8.0000	conv	0.04	125.96	126	density	0.004	7.984	7.988	covered_nt	0.396	526.604	527
TIMM23	hits	0.000	4.000	4.000	conv	0	126	126	density	0	5.262	5.262	covered_nt	0	437	437
PSMB7	hits	0.000	2.000	2.000	conv	0	126	126	density	0	5.254	5.254	covered_nt	0	366	366
PIM3	hits	0.000	10.000	10.000	conv	0	126	126	density	0	5.108	5.108	covered_nt	0	797	797
UQCRC1	hits	0.000	5.000	5.000	conv	0	126	126	density	0	4.584	4.584	covered_nt	0	372	372
APH1A	hits	0.0040	11.9970	12.0010	conv	0.012	125.987	125.999	density	0.019	20.112	20.131	covered_nt	0.266	905.734	906.002
HOXA10-HOXA9	hits	0.094	6.000	6.094	conv	0.581	125	125.581	density	0.041	4.308	4.349	covered_nt	4.503	397	401.503
VKORC1	hits	1.0100	7.9900	9.0000	conv	17.05	107.95	125	density	2.678	9.776	12.454	covered_nt	96.663	543.337	640
AHCY	hits	0.0000	8.0000	8.0000	conv	0	125	125	density	0	7.712	7.712	covered_nt	0	617	617
TMEM55B	hits	0.0000	4.0000	4.0000	conv	0	125	125	density	0	7.387	7.387	covered_nt	0	407	407
WBP2	hits	0.000	16.000	16.000	conv	0	125	125	density	0	5.416	5.416	covered_nt	0	811	811
AIMP2	hits	0.000	3.000	3.000	conv	0	125	125	density	0	4.919	4.919	covered_nt	0	357	357
RAB1B	hits	0.000	10.000	10.000	conv	0	125	125	density	0	4.874	4.874	covered_nt	0	554	554
MFAP1	hits	0.000	4.000	4.000	conv	0	125	125	density	0	4.714	4.714	covered_nt	0	521	521
LAPTM4A	hits	0.000	7.000	7.000	conv	0	125	125	density	0	4.608	4.608	covered_nt	0	413	413
GNG12	hits	1.000	14.000	15.000	conv	2	123	125	density	0.027	4.248	4.275	covered_nt	24	794	818
NUDT1	hits	0.0000	3.9970	3.9970	conv	0	124.999	124.999	density	0	20.991	20.991	covered_nt	0	358.001	358.001
CENPM	hits	2.9990	2.9990	6.0010	conv	77.001	47	124.001	density	7.047	9.709	16.757	covered_nt	478.999	201	679.999
FAM96B	hits	0.0200	5.9800	6.0000	conv	0.069	123.931	124	density	0.073	9.861	9.934	covered_nt	0.861	461.139	462
PLD3	hits	1.0000	7.0000	8.0000	conv	2	122	124	density	0.196	7.575	7.772	covered_nt	39	587	626
DCTN2	hits	0.000	8.000	8.000	conv	0	124	124	density	0	5.279	5.279	covered_nt	0	650	650
TMEM97	hits	0.000	13.000	13.000	conv	0	124	124	density	0	4.871	4.871	covered_nt	0	726	726
PSMD9	hits	1.000	5.000	6.000	conv	56	68	124	density	0.751	3.795	4.547	covered_nt	183	302	485
ARL2	hits	0.6760	3.3090	3.9850	conv	45.402	77.917	123.32	density	2.276	8.803	11.08	covered_nt	171.431	385.794	557.226
MRPL10	hits	0.0000	9.9990	9.9990	conv	0	123	123	density	0	10.945	10.945	covered_nt	0	633.999	633.999
RPUSD3	hits	1.0000	8.0000	9.0000	conv	3	120	123	density	1.215	8.896	10.111	covered_nt	52	502	554
ARPC2	hits	0.0000	10.0000	10.0000	conv	0	123	123	density	0	8.622	8.622	covered_nt	0	539	539
ERAL1	hits	1.000	10.000	11.000	conv	11	112	123	density	1.854	5.479	7.333	covered_nt	110	796	906
C7orf11	hits	0.000	7.000	7.000	conv	0	123	123	density	0	5.576	5.576	covered_nt	0	440	440
PTMS	hits	0.000	3.000	3.000	conv	0	123	123	density	0	5.488	5.488	covered_nt	0	505	505
CDC123	hits	2.000	4.000	6.000	conv	17	106	123	density	0.329	5.002	5.331	covered_nt	136	481	617
FAM127A	hits	0.000	7.000	7.000	conv	0	123	123	density	0	5.106	5.106	covered_nt	0	416	416
C19orf53	hits	0.000	1.000	1.000	conv	0	123	123	density	0	5.086	5.086	covered_nt	0	300	300
ATP5SL	hits	1.0010	7.0000	8.0010	conv	3.003	120.001	122.997	density	0.669	21.362	22.033	covered_nt	32.998	837.998	871.003
LSMD1	hits	1.000	3.000	4.000	conv	15	107	122	density	5.093	4.766	9.859	covered_nt	57	262	319
PSMA5	hits	2.0000	4.0000	6.0000	conv	29	93	122	density	0.613	6.14	6.753	covered_nt	106	286	392
GOT1	hits	0.000	13.000	13.000	conv	0	122	122	density	0	4.969	4.969	covered_nt	0	645	645
VAMP3	hits	0.000	9.000	9.000	conv	0	122	122	density	0	4.836	4.836	covered_nt	0	608	608
C7orf55	hits	0.000	1.478	1.478	conv	0	121.671	121.671	density	0	5.694	5.694	covered_nt	0	339.099	339.099
MEPCE	hits	0.0300	11.9710	12.0010	conv	0.087	120.913	121	density	0.068	14.02	14.086	covered_nt	1.572	909.427	910.999
HMGN3	hits	0.0330	3.9670	4.0000	conv	1.555	119.447	121	density	0.022	13.043	13.066	covered_nt	5.003	427.997	433
POP5	hits	1.0100	2.9900	4.0000	conv	3.079	117.921	121	density	1.667	9.936	11.604	covered_nt	25.465	439.535	465
HNRNPH3	hits	2.0000	12.0000	14.0000	conv	39	82	121	density	2.49	7.915	10.405	covered_nt	241	695	936
BANF1	hits	0.0000	4.0000	4.0000	conv	0	121	121	density	0	6.826	6.826	covered_nt	0	217	217
HIST1H2BK	hits	1.000	7.000	8.000	conv	8	113	121	density	0.808	5.575	6.383	covered_nt	58	392	450
MRPL27	hits	0.000	4.000	4.000	conv	0	121	121	density	0	6.147	6.147	covered_nt	0	492	492
EIF4E2	hits	1.000	6.000	7.000	conv	4	117	121	density	0.192	5.358	5.55	covered_nt	25	404	429
MRPL12	hits	0.000	4.000	4.000	conv	0	121	121	density	0	5.514	5.514	covered_nt	0	454	454
MTA2	hits	0.000	10.000	10.000	conv	0	121	121	density	0	4.742	4.742	covered_nt	0	791	791
ZNF580	hits	0.0000	5.0010	5.0010	conv	0	120.999	120.999	density	0	12.018	12.018	covered_nt	0	534	534
C11orf31	hits	1.500	3.960	5.460	conv	26	94.059	120.059	density	3.664	4.234	7.898	covered_nt	101.5	230.693	332.193
DBI	hits	0.0000	3.0030	3.0030	conv	0	120.001	120.001	density	0	19.768	19.768	covered_nt	0	287	287
UBL5	hits	0.0000	3.0000	3.0000	conv	0	120	120	density	0	9.095	9.095	covered_nt	0	217	217
CSNK1E	hits	8.0000	12.0000	20.0000	conv	38	82	120	density	1.567	7.309	8.877	covered_nt	351	630	981
NUBP2	hits	2.000	7.000	9.000	conv	6	114	120	density	1.738	5.686	7.424	covered_nt	114	698	812
EIF5	hits	0.0000	16.0000	16.0000	conv	0	120	120	density	0	6.15	6.15	covered_nt	0	858	858
DDX17	hits	0.0000	15.0000	15.0000	conv	0	120	120	density	0	6.146	6.146	covered_nt	0	711	711
TFDP1	hits	3.0000	9.0000	12.0000	conv	60	60	120	density	0.395	5.738	6.133	covered_nt	159	319	478
FIS1	hits	0.000	5.000	5.000	conv	0	120	120	density	0	5.94	5.94	covered_nt	0	447	447
ZNHIT3	hits	0.000	6.000	6.000	conv	0	120	120	density	0	5.716	5.716	covered_nt	0	492	492
PPIL1	hits	0.000	13.000	13.000	conv	0	120	120	density	0	5.603	5.603	covered_nt	0	827	827
RPL13A	hits	0.510	3.000	3.510	conv	2.02	117.5	119.52	density	0.574	3.896	4.47	covered_nt	17.461	156.5	173.961
ATP5J	hits	1.0060	6.9930	7.9990	conv	13.014	105.986	119	density	0.602	15.509	16.112	covered_nt	44.192	379.809	424.001
SLC16A1	hits	0.0000	12.0000	12.0000	conv	0	119	119	density	0	7.06	7.06	covered_nt	0	873	873
CKS2	hits	0.000	6.000	6.000	conv	0	119	119	density	0	6.037	6.037	covered_nt	0	397	397
NDUFA12	hits	0.000	6.000	6.000	conv	0	119	119	density	0	5.741	5.741	covered_nt	0	315	315
BEX1	hits	0.000	3.000	3.000	conv	0	119	119	density	0	5.485	5.485	covered_nt	0	378	378
VBP1	hits	0.000	11.000	11.000	conv	0	119	119	density	0	5.484	5.484	covered_nt	0	713	713
C1orf35	hits	0.000	3.000	3.000	conv	0	119	119	density	0	5.298	5.298	covered_nt	0	495	495
SF3B2	hits	0.000	8.000	8.000	conv	0	119	119	density	0	4.113	4.113	covered_nt	0	472	472
RRM2	hits	0.0000	11.0000	11.0000	conv	0	118	118	density	0	7.184	7.184	covered_nt	0	741	741
C20orf27	hits	1.000	12.000	13.000	conv	2	116	118	density	0.265	5.634	5.898	covered_nt	26	670	696
TIMM17A	hits	1.000	10.000	11.000	conv	4	114	118	density	0.298	5.36	5.658	covered_nt	31	665	696
KHDRBS1	hits	0.000	10.000	10.000	conv	0	118	118	density	0	4.876	4.876	covered_nt	0	762	762
TUBG1	hits	0.000	3.000	3.000	conv	0	118	118	density	0	4.227	4.227	covered_nt	0	346	346
ELAVL1	hits	0.000	13.000	13.000	conv	0	118	118	density	0	3.667	3.667	covered_nt	0	709	709
DCXR	hits	6.0000	4.0000	10.0000	conv	34	83	117	density	7.902	8.744	16.646	covered_nt	287	326	613
TMEM106C	hits	0.0100	11.9900	12.0000	conv	0.02	116.98	117	density	0.009	15.07	15.078	covered_nt	0.238	769.762	770
CDKN1A	hits	0.0000	11.0000	11.0000	conv	0	117	117	density	0	12.845	12.845	covered_nt	0	714	714
CHTOP	hits	3.0000	3.0000	6.0000	conv	9.999	107.001	117	density	1.717	9.389	11.106	covered_nt	150	477	627
DDX39A	hits	2.0000	4.0000	6.0000	conv	24	93	117	density	1.866	7.763	9.629	covered_nt	161	436	597
GTF3C5	hits	1.0000	9.0000	10.0000	conv	3	114	117	density	0.234	7.95	8.184	covered_nt	43	716	759
NPM1	hits	0.0580	4.9410	4.9990	conv	1.588	115.412	117	density	0.026	8.052	8.079	covered_nt	4	287	291
ATOX1	hits	0.000	4.000	4.000	conv	0	117	117	density	0	6.12	6.12	covered_nt	0	336	336
MBD3	hits	1.000	14.000	15.000	conv	2	115	117	density	0.385	4.923	5.308	covered_nt	41	751	792
DDRGK1	hits	0.000	4.000	4.000	conv	0	117	117	density	0	5.201	5.201	covered_nt	0	449	449
FAM50A	hits	0.000	3.000	3.000	conv	0	117	117	density	0	4.891	4.891	covered_nt	0	388	388
TUBA1C	hits	0.000	8.000	8.000	conv	0	117	117	density	0	4.889	4.889	covered_nt	0	445	445
ABT1	hits	0.000	6.000	6.000	conv	0	117	117	density	0	4.838	4.838	covered_nt	0	625	625
SFPQ	hits	0.000	8.000	8.000	conv	0	117	117	density	0	4.415	4.415	covered_nt	0	625	625
PSMD11	hits	2.000	4.000	6.000	conv	89	28	117	density	0.965	3.309	4.275	covered_nt	333	141	474
TSPYL1	hits	0.000	12.000	12.000	conv	0	117	117	density	0	3.727	3.727	covered_nt	0	644	644
POLR2A	hits	0.000	15.000	15.000	conv	0	117	117	density	0	3.691	3.691	covered_nt	0	803	803
CLTC	hits	0.000	17.000	17.000	conv	0	117	117	density	0	3.373	3.373	covered_nt	0	803	803
EDC3	hits	0.9990	17.0010	18.0000	conv	8.001	108	116.001	density	0.162	9.415	9.576	covered_nt	69.999	912	981.999
MRPS35	hits	0.0000	8.0000	8.0000	conv	0	116	116	density	0	7.892	7.892	covered_nt	0	531	531
SNRPB2	hits	0.0000	3.0000	3.0000	conv	0	116	116	density	0	6.511	6.511	covered_nt	0	279	279
PLP2	hits	0.000	4.000	4.000	conv	0	116	116	density	0	5.559	5.559	covered_nt	0	484	484
E2F1	hits	0.000	16.000	16.000	conv	0	116	116	density	0	5.127	5.127	covered_nt	0	917	917
PA2G4	hits	0.000	7.000	7.000	conv	0	116	116	density	0	4.047	4.047	covered_nt	0	408	408
PRC1	hits	0.0050	9.9960	10.0010	conv	0.025	114.975	115	density	0.002	9.233	9.235	covered_nt	0.323	684.677	685
CST3	hits	0.000	5.000	5.000	conv	0	115	115	density	0	5.628	5.628	covered_nt	0	376	376
VPS72	hits	0.000	11.000	11.000	conv	0	115	115	density	0	5.513	5.513	covered_nt	0	592	592
ANP32B	hits	0.000	5.000	5.000	conv	0	115	115	density	0	4.593	4.593	covered_nt	0	374	374
MRPS16	hits	0.000	6.000	6.000	conv	0	115	115	density	0	4.146	4.146	covered_nt	0	440	440
RAB5C	hits	0.0000	8.0010	8.0010	conv	0	114.999	114.999	density	0	10.946	10.946	covered_nt	0	626.001	626.001
RPAIN	hits	0.0060	2.9920	2.9980	conv	0.036	114.96	114.996	density	0.002	13.558	13.56	covered_nt	0.21	241.792	242.002
NAPA	hits	0.0250	6.9750	7.0000	conv	0.323	113.677	114.001	density	0.016	11.211	11.226	covered_nt	2.781	741.219	744
PPP2R4	hits	1.0030	14.9960	15.9990	conv	3.017	110.983	114	density	0.26	15.631	15.891	covered_nt	64.233	1036.77	1101
TRAPPC5	hits	0.0000	3.9990	3.9990	conv	0	114	114	density	0	13.708	13.708	covered_nt	0	510	510
RBM10	hits	0.0000	6.0000	6.0000	conv	0	114	114	density	0	9.934	9.934	covered_nt	0	491	491
NDUFS5	hits	0.0000	4.0000	4.0000	conv	0	114	114	density	0	9.58	9.58	covered_nt	0	304	304
CCT6A	hits	1.0100	8.9900	10.0000	conv	6.02	107.98	114	density	0.892	6.957	7.849	covered_nt	70.287	527.713	598
UROD	hits	0.0000	7.0000	7.0000	conv	0	114	114	density	0	7.777	7.777	covered_nt	0	396	396
SARS	hits	0.0400	7.9600	8.0000	conv	0.149	113.851	114	density	0.012	7.166	7.178	covered_nt	1.941	559.059	561
RRP36	hits	0.000	6.000	6.000	conv	0	114	114	density	0	4.99	4.99	covered_nt	0	357	357
ILVBL	hits	0.000	7.000	7.000	conv	0	114	114	density	0	4.463	4.463	covered_nt	0	484	484
TP53	hits	2.0000	5.9980	7.9980	conv	8	105.999	113.999	density	0.597	12.419	13.015	covered_nt	72	427	499
SENP3-EIF4A1	hits	0.530	7.500	8.030	conv	4.545	109.167	113.711	density	0.39	3.345	3.736	covered_nt	39.485	394.5	433.985
AES	hits	0.9990	9.0000	9.9990	conv	2.001	111	113.001	density	0.415	11.523	11.938	covered_nt	24	678.999	702.999
COPE	hits	0.0050	5.9950	6.0000	conv	0.01	112.99	113	density	0.001	10.419	10.42	covered_nt	0.159	312.841	313
GRB2	hits	1.0000	9.0000	10.0000	conv	6	107	113	density	0.11	6.776	6.887	covered_nt	66	614	680
NDUFB3	hits	0.000	4.000	4.000	conv	0	113	113	density	0	5.113	5.113	covered_nt	0	254	254
RER1	hits	1.000	9.000	10.000	conv	2	111	113	density	0.35	4.42	4.769	covered_nt	29	633	662
RAVER1	hits	0.000	13.000	13.000	conv	0	113	113	density	0	4.726	4.726	covered_nt	0	915	915
C14orf166	hits	0.000	2.000	2.000	conv	0	113	113	density	0	4.55	4.55	covered_nt	0	236	236
PTPLAD1	hits	0.000	12.000	12.000	conv	0	113	113	density	0	4.188	4.188	covered_nt	0	553	553
ACLY	hits	0.0000	7.0000	7.0000	conv	0	112	112	density	0	6.365	6.365	covered_nt	0	701	701
GINS2	hits	1.000	7.000	8.000	conv	2	110	112	density	0.295	5.69	5.985	covered_nt	23	598	621
TMEM59	hits	0.000	9.000	9.000	conv	0	112	112	density	0	5.072	5.072	covered_nt	0	554	554
CDC20	hits	0.000	8.000	8.000	conv	0	112	112	density	0	4.879	4.879	covered_nt	0	476	476
CAMLG	hits	0.000	9.000	9.000	conv	0	112	112	density	0	4.78	4.78	covered_nt	0	594	594
RBM22	hits	0.000	8.000	8.000	conv	0	112	112	density	0	4.423	4.423	covered_nt	0	480	480
ANP32E	hits	0.0000	6.9990	6.9990	conv	0	111.999	111.999	density	0	8.254	8.254	covered_nt	0	567.999	567.999
NME1-NME2	hits	1.5330	2.9710	4.5040	conv	51.614	59.584	111.198	density	0.855	6.281	7.135	covered_nt	117.344	185.998	303.343
ACOT7	hits	0.0000	5.0000	5.0000	conv	0	111	111	density	0	11.379	11.379	covered_nt	0	386	386
PRKAR1A	hits	3.0000	11.0010	14.0010	conv	6	105	111	density	0.752	8.791	9.542	covered_nt	96	723	819
ITPA	hits	0.0000	8.0000	8.0000	conv	0	111	111	density	0	9.524	9.524	covered_nt	0	575	575
GORASP2	hits	0.0100	12.9900	13.0000	conv	0.059	110.941	111	density	0.002	7.51	7.513	covered_nt	0.594	696.406	697
RPP30	hits	0.0690	16.9310	17.0000	conv	0.584	110.416	111	density	0.016	7.131	7.146	covered_nt	3.574	704.426	708
SRSF6	hits	0.0000	11.0000	11.0000	conv	0	111	111	density	0	5.768	5.768	covered_nt	0	495	495
RUVBL2	hits	1.000	8.000	9.000	conv	3	108	111	density	0.331	5.148	5.479	covered_nt	53	513	566
MRPL2	hits	0.000	5.000	5.000	conv	0	111	111	density	0	4.809	4.809	covered_nt	0	348	348
ARFIP2	hits	1.0300	8.9710	10.0010	conv	2.057	108.942	110.999	density	0.926	9.902	10.827	covered_nt	21.816	669.184	691
MRPL42	hits	0.0000	12.0000	12.0000	conv	0	110	110	density	0	11.168	11.168	covered_nt	0	587	587
PHPT1	hits	1.0000	3.0000	4.0000	conv	2	108	110	density	3.049	7.329	10.379	covered_nt	38	286	324
LY6E	hits	0.0000	7.0000	7.0000	conv	0	110	110	density	0	9.755	9.755	covered_nt	0	667	667
C19orf63	hits	0.0000	15.0000	15.0000	conv	0	110	110	density	0	9.335	9.335	covered_nt	0	972	972
RAC3	hits	1.000	6.000	7.000	conv	8	102	110	density	2.896	5.884	8.78	covered_nt	96	616	712
RNPS1	hits	0.0000	7.0000	7.0000	conv	0	110	110	density	0	6.705	6.705	covered_nt	0	401	401
NAA10	hits	1.000	5.000	6.000	conv	11	99	110	density	0.854	5.661	6.515	covered_nt	34	438	472
TARS	hits	1.000	9.000	10.000	conv	3	107	110	density	0.188	4.592	4.78	covered_nt	34	659	693
CALM1	hits	1.000	12.000	13.000	conv	2	108	110	density	0.762	3.988	4.751	covered_nt	49	633	682
WDR77	hits	0.000	8.000	8.000	conv	0	110	110	density	0	4.714	4.714	covered_nt	0	608	608
C17orf61	hits	0.000	2.480	2.480	conv	0	109.931	109.931	density	0	5.936	5.936	covered_nt	0	290.376	290.376
NUSAP1	hits	0.0000	13.0000	13.0000	conv	0	109	109	density	0	13.771	13.771	covered_nt	0	691	691
NDUFB8	hits	1.000	2.000	3.000	conv	2	107	109	density	0.489	4.967	5.456	covered_nt	22	208	230
ARPC5	hits	0.000	12.000	12.000	conv	0	109	109	density	0	5.176	5.176	covered_nt	0	697	697
DCAF7	hits	1.000	10.000	11.000	conv	2	107	109	density	0.143	3.675	3.818	covered_nt	39	748	787
HNRPDL	hits	0.0250	8.9750	9.0000	conv	0.143	107.857	108	density	0.061	6.716	6.777	covered_nt	1.567	475.432	477
ZNHIT1	hits	1.000	5.000	6.000	conv	41	67	108	density	2.04	4.421	6.461	covered_nt	165	243	408
TMEM9	hits	0.000	9.000	9.000	conv	0	108	108	density	0	5.297	5.297	covered_nt	0	590	590
TALDO1	hits	1.000	6.000	7.000	conv	3	105	108	density	0.205	5.048	5.253	covered_nt	25	399	424
MANF	hits	0.000	3.000	3.000	conv	0	108	108	density	0	5.195	5.195	covered_nt	0	335	335
COPS4	hits	0.000	6.000	6.000	conv	0	108	108	density	0	4.917	4.917	covered_nt	0	511	511
TXLNA	hits	0.000	19.000	19.000	conv	0	108	108	density	0	4.534	4.534	covered_nt	0	1063	1063
EIF2S1	hits	0.000	12.000	12.000	conv	0	108	108	density	0	4.23	4.23	covered_nt	0	740	740
LRRC47	hits	0.000	6.000	6.000	conv	0	108	108	density	0	4.225	4.225	covered_nt	0	469	469
IRF2BP1	hits	0.000	5.000	5.000	conv	0	108	108	density	0	4.121	4.121	covered_nt	0	412	412
SRRM2	hits	0.000	16.000	16.000	conv	0	108	108	density	0	3.33	3.33	covered_nt	0	847	847
MORF4L2	hits	0.0000	10.0000	10.0000	conv	0	107.008	107.008	density	0	25.327	25.327	covered_nt	0	620	620
NAA20	hits	0.0000	5.0010	5.0010	conv	0	107.001	107.001	density	0	11.27	11.27	covered_nt	0	399	399
MYL12B	hits	0.0000	3.9990	3.9990	conv	0	107.001	107.001	density	0	9.116	9.116	covered_nt	0	215.001	215.001
MCRS1	hits	0.0000	10.0000	10.0000	conv	0	107	107	density	0	8.057	8.057	covered_nt	0	566	566
PXMP2	hits	0.000	8.000	8.000	conv	0	107	107	density	0	6.123	6.123	covered_nt	0	658	658
VPS4A	hits	0.000	9.000	9.000	conv	0	107	107	density	0	5.305	5.305	covered_nt	0	839	839
FLNA	hits	0.0000	6.0000	6.0000	conv	0	107	107	density	0	3.865	3.865	covered_nt	0	479	479
SLC25A1	hits	2.0000	8.0000	10.0000	conv	19	87	106	density	5.545	8.433	13.978	covered_nt	176	550	726
CD151	hits	1.0000	4.0000	5.0000	conv	19	87	106	density	2.978	10.108	13.085	covered_nt	118	289	407
NDUFA8	hits	0.000	5.000	5.000	conv	0	106	106	density	0	5.546	5.546	covered_nt	0	386	386
CHCHD10	hits	0.000	3.000	3.000	conv	0	106	106	density	0	5.299	5.299	covered_nt	0	262	262
DEGS1	hits	0.000	10.000	10.000	conv	0	106	106	density	0	5.06	5.06	covered_nt	0	668	668
UTP11L	hits	0.000	7.000	7.000	conv	0	106	106	density	0	4.451	4.451	covered_nt	0	428	428
RPF1	hits	0.000	4.000	4.000	conv	0	106	106	density	0	3.722	3.722	covered_nt	0	241	241
URGCP-MRPS24	hits	0.507	0.500	1.007	conv	2.523	103	105.523	density	0.097	4.603	4.7	covered_nt	27.266	195.5	222.766
MRPS24	hits	0.500	0.500	1.000	conv	2.5	103	105.5	density	1.122	4.86	5.983	covered_nt	27	195.5	222.5
CHMP1A	hits	0.0000	9.0000	9.0000	conv	0	105	105	density	0	8.148	8.148	covered_nt	0	743	743
CHCHD8	hits	2.000	9.000	11.000	conv	4	101	105	density	1.462	6.015	7.476	covered_nt	59	520	579
MRTO4	hits	1.000	10.000	11.000	conv	20	85	105	density	1.176	4.634	5.81	covered_nt	79	542	621
MMADHC	hits	1.000	8.000	9.000	conv	4	101	105	density	0.337	5.4	5.737	covered_nt	44	593	637
EXOSC5	hits	0.000	4.000	4.000	conv	0	105	105	density	0	5.154	5.154	covered_nt	0	344	344
SPRYD4	hits	0.000	9.000	9.000	conv	0	105	105	density	0	4.618	4.618	covered_nt	0	496	496
THOP1	hits	0.000	6.000	6.000	conv	0	105	105	density	0	4.458	4.458	covered_nt	0	535	535
FASN	hits	1.000	9.000	10.000	conv	6	99	105	density	0.906	3.072	3.979	covered_nt	100	627	727
TMEM222	hits	1.0100	10.9900	12.0000	conv	21.02	82.98	104	density	1.111	13.33	14.441	covered_nt	106.288	629.712	736
LOC388796	hits	2.0000	7.0000	9.0000	conv	30	74	104	density	0.783	8.68	9.464	covered_nt	85	429	514
LOC100506930	hits	4.0000	4.0000	8.0000	conv	80	24	104	density	1.617	6.482	8.099	covered_nt	198	221	419
COX4NB	hits	0.0000	10.0000	10.0000	conv	0	104	104	density	0	8.067	8.067	covered_nt	0	589	589
RPL30	hits	5.000	3.000	8.000	conv	53	51	104	density	3.11	4.925	8.034	covered_nt	254	163	417
CBR1	hits	1.000	8.000	9.000	conv	2	102	104	density	1.261	5.566	6.827	covered_nt	27	578	605
C15orf24	hits	1.000	5.000	6.000	conv	2	102	104	density	0.23	5.52	5.75	covered_nt	29	473	502
HNRNPH1	hits	0.000	11.000	11.000	conv	0	104	104	density	0	4.851	4.851	covered_nt	0	627	627
ZNF787	hits	0.000	7.000	7.000	conv	0	104	104	density	0	4.499	4.499	covered_nt	0	417	417
SCD	hits	1.000	13.000	14.000	conv	3	101	104	density	0.499	3.366	3.864	covered_nt	51	509	560
LYRM4	hits	0.0400	5.9610	6.0010	conv	0.156	103.843	103.999	density	0.002	11.098	11.1	covered_nt	2.294	452.706	455
NENF	hits	0.0000	6.0000	6.0000	conv	0	103	103	density	0	9.392	9.392	covered_nt	0	458	458
NDUFA1	hits	1.000	3.000	4.000	conv	11	92	103	density	0.998	5.634	6.632	covered_nt	44	237	281
AP3M1	hits	0.0000	9.0000	9.0000	conv	0	103	103	density	0	5.83	5.83	covered_nt	0	679	679
ADPRHL2	hits	0.000	9.000	9.000	conv	0	103	103	density	0	5.559	5.559	covered_nt	0	781	781
JMJD6	hits	0.0200	4.9800	5.0000	conv	0.95	102.05	103	density	0.047	5.38	5.427	covered_nt	2.822	402.178	405
CCNI	hits	0.000	10.000	10.000	conv	0	103	103	density	0	5.231	5.231	covered_nt	0	686	686
ATP6V1D	hits	0.000	9.000	9.000	conv	0	103	103	density	0	5.077	5.077	covered_nt	0	592	592
NARS	hits	0.000	9.000	9.000	conv	0	103	103	density	0	4.406	4.406	covered_nt	0	579	579
GOT2	hits	0.000	8.000	8.000	conv	0	103	103	density	0	4.28	4.28	covered_nt	0	451	451
USP22	hits	0.000	18.000	18.000	conv	0	103	103	density	0	4.098	4.098	covered_nt	0	842	842
NT5C3L	hits	2.0010	6.0000	8.0010	conv	8.001	95.001	102.999	density	0.84	11.194	12.033	covered_nt	62.001	558.999	621
NDUFAF3	hits	1.0300	4.9710	6.0010	conv	2.234	99.767	102.001	density	4.951	12.989	17.94	covered_nt	53.428	362.573	416.001
C2orf28	hits	0.0000	6.0000	6.0000	conv	0	102	102	density	0	10.024	10.024	covered_nt	0	297	297
CD320	hits	0.0000	5.0000	5.0000	conv	0	102	102	density	0	9.369	9.369	covered_nt	0	587	587
RPS8	hits	6.000	5.000	11.000	conv	74	28	102	density	3.781	4.773	8.554	covered_nt	314	186	500
RABAC1	hits	1.000	5.000	6.000	conv	10	92	102	density	2.313	5.865	8.178	covered_nt	75	463	538
PES1	hits	0.0000	3.0000	3.0000	conv	0	102	102	density	0	7.782	7.782	covered_nt	0	365.001	365.001
MAF1	hits	1.000	6.000	7.000	conv	19	83	102	density	2.98	4.653	7.633	covered_nt	99	429	528
RAC1	hits	0.0000	9.0000	9.0000	conv	0	102	102	density	0	7.188	7.188	covered_nt	0	525	525
SRSF3	hits	0.0100	11.9900	12.0000	conv	0.03	101.97	102	density	0.014	6.713	6.726	covered_nt	0.663	625.337	626
C7orf44	hits	2.000	6.000	8.000	conv	17	85	102	density	0.157	5.219	5.376	covered_nt	103	311	414
RUVBL1	hits	0.000	4.000	4.000	conv	0	102	102	density	0	4.374	4.374	covered_nt	0	349	349
CAPZA1	hits	0.000	8.000	8.000	conv	0	102	102	density	0	3.617	3.617	covered_nt	0	309	309
APTX	hits	0.0010	13.9970	13.9980	conv	0.002	101.002	101.004	density	0	22.908	22.908	covered_nt	0.025	659.977	660.002
KXD1	hits	0.9990	9.0000	9.9990	conv	6.999	93.999	101.001	density	0.434	11.728	12.162	covered_nt	32.001	638.001	669.999
UCK1	hits	0.0100	14.9900	15.0000	conv	0.02	100.98	101	density	0.008	8.498	8.506	covered_nt	0.287	768.713	769
RPS15	hits	2.000	3.000	5.000	conv	38	63	101	density	3.788	4.57	8.357	covered_nt	205	121	326
SDF4	hits	0.0000	7.0000	7.0000	conv	0	101	101	density	0	7.576	7.576	covered_nt	0	533	533
LSM14A	hits	0.0100	15.9900	16.0000	conv	0.04	100.96	101	density	0.001	6.819	6.82	covered_nt	0.317	721.683	722
UBXN1	hits	1.000	3.000	4.000	conv	2	99	101	density	1.609	4.895	6.504	covered_nt	26	371	397
EPB41L4A-AS1	hits	0.000	4.000	4.000	conv	0	101	101	density	0	5.086	5.086	covered_nt	0	394	394
ICMT	hits	2.000	17.000	19.000	conv	8	93	101	density	0.849	3.986	4.835	covered_nt	80	715	795
MRPL3	hits	0.000	11.000	11.000	conv	0	101	101	density	0	4.619	4.619	covered_nt	0	416	416
HARS	hits	0.000	7.000	7.000	conv	0	101	101	density	0	4.56	4.56	covered_nt	0	444	444
DDA1	hits	0.000	12.000	12.000	conv	0	101	101	density	0	4.02	4.02	covered_nt	0	621	621
DLD	hits	1.000	8.000	9.000	conv	3	98	101	density	0.14	3.854	3.994	covered_nt	27	482	509
RBM8A	hits	0.000	8.000	8.000	conv	0	101	101	density	0	3.18	3.18	covered_nt	0	400	400
BID	hits	0.0000	4.9980	4.9980	conv	0	100.002	100.002	density	0	11.227	11.227	covered_nt	0	306.999	306.999
SEC61G	hits	1.0000	2.0000	3.0000	conv	79	21	100	density	2.355	5.917	8.272	covered_nt	165	63	228
PPP5C	hits	0.0000	9.0000	9.0000	conv	0	100	100	density	0	7.81	7.81	covered_nt	0	615	615
C16orf42	hits	0.000	6.000	6.000	conv	0	100	100	density	0	5.046	5.046	covered_nt	0	386	386
HSPA9	hits	2.000	6.000	8.000	conv	10	90	100	density	0.655	3.89	4.545	covered_nt	99	485	584
MCM3	hits	0.000	8.000	8.000	conv	0	100	100	density	0	3.962	3.962	covered_nt	0	454	454
EIF2S2	hits	1.000	7.000	8.000	conv	2	98	100	density	0.27	3.589	3.859	covered_nt	44	286	330
NDUFC1	hits	0.0000	3.9970	3.9970	conv	0	99.001	99.001	density	0	17.34	17.34	covered_nt	0	280	280
TFG	hits	0.0000	6.0000	6.0000	conv	0	99	99	density	0	12.052	12.052	covered_nt	0	542	542
C21orf33	hits	1.0000	4.0000	5.0000	conv	2	97	99	density	0.583	8.554	9.137	covered_nt	47	596	643
SRSF5	hits	1.0000	10.0000	11.0000	conv	2	97	99	density	0.893	7.966	8.859	covered_nt	24	469	493
COX6A1	hits	1.000	4.000	5.000	conv	5	94	99	density	1.992	5.227	7.219	covered_nt	62	199	261
C1orf144	hits	0.0000	13.0000	13.0000	conv	0	99	99	density	0	6.716	6.716	covered_nt	0	668	668
MRPL40	hits	1.000	4.000	5.000	conv	2	97	99	density	1.003	5.116	6.119	covered_nt	28	261	289
SLIRP	hits	2.000	2.000	4.000	conv	71	28	99	density	1.588	4.375	5.963	covered_nt	183	79	262
SELK	hits	0.000	6.000	6.000	conv	0	99	99	density	0	5.234	5.234	covered_nt	0	300	300
WDR34	hits	1.000	5.000	6.000	conv	23	76	99	density	0.806	4.275	5.081	covered_nt	160	334	494
HOXB9	hits	0.000	9.000	9.000	conv	0	99	99	density	0	4.589	4.589	covered_nt	0	623	623
ZCCHC12	hits	0.000	4.000	4.000	conv	0	99	99	density	0	4.3	4.3	covered_nt	0	411	411
SLC7A5	hits	0.000	11.000	11.000	conv	0	99	99	density	0	3.755	3.755	covered_nt	0	568	568
KPNA6	hits	0.000	19.000	19.000	conv	0	99	99	density	0	3.681	3.681	covered_nt	0	872	872
NDUFC2	hits	0.0070	3.4670	3.4750	conv	0.331	98.541	98.872	density	0.014	7.248	7.262	covered_nt	0.942	337.777	338.719
MCL1	hits	0.0150	15.9850	16.0000	conv	0.055	97.946	98.001	density	0.061	8.533	8.594	covered_nt	0.582	717.417	717.999
DDX3X	hits	0.9990	9.0000	9.9990	conv	2.001	96	98.001	density	0.596	6.617	7.213	covered_nt	51	582.999	633.999
MAT2B	hits	0.0000	9.0000	9.0000	conv	0	98	98	density	0	8.219	8.219	covered_nt	0	679	679
DHCR7	hits	0.0000	9.0000	9.0000	conv	0	98	98	density	0	7.32	7.32	covered_nt	0	618	618
NDUFS8	hits	2.000	5.000	7.000	conv	12	86	98	density	1.661	5.631	7.292	covered_nt	113	391	504
PDHA1	hits	0.0000	3.0000	3.0000	conv	0	98	98	density	0	7.201	7.201	covered_nt	0	336	336
PPDPF	hits	0.000	3.000	3.000	conv	0	98	98	density	0	5.937	5.937	covered_nt	0	469	469
C19orf42	hits	0.000	8.000	8.000	conv	0	98	98	density	0	5.077	5.077	covered_nt	0	450	450
CCDC86	hits	0.000	9.000	9.000	conv	0	98	98	density	0	4.852	4.852	covered_nt	0	562	562
GDI1	hits	0.000	11.000	11.000	conv	0	98	98	density	0	4.69	4.69	covered_nt	0	616	616
FOXC1	hits	0.000	13.000	13.000	conv	0	98	98	density	0	4.382	4.382	covered_nt	0	685	685
REEP5	hits	0.000	6.000	6.000	conv	0	98	98	density	0	4.121	4.121	covered_nt	0	511	511
ETF1	hits	0.000	5.000	5.000	conv	0	98	98	density	0	3.325	3.325	covered_nt	0	333	333
LSM1	hits	0.0050	5.9950	6.0000	conv	0.045	97.955	97.999	density	0.004	11.75	11.754	covered_nt	0.313	435.687	436.001
CALU	hits	0.0000	15.0000	15.0000	conv	0	97.002	97.002	density	0	10.557	10.557	covered_nt	0	787.002	787.002
SRA1	hits	0.0030	7.9960	7.9990	conv	0.027	96.974	97.001	density	0.005	12.032	12.038	covered_nt	0.223	462.777	463
PSMA3	hits	0.0050	2.9950	3.0000	conv	0.01	96.991	97.001	density	0.001	8.694	8.695	covered_nt	0.154	187.845	188
HIST1H3B	hits	0.000	4.000	4.000	conv	0	97	97	density	0	6.606	6.606	covered_nt	0	456	456
DYNLT1	hits	0.000	4.000	4.000	conv	0	97	97	density	0	5.819	5.819	covered_nt	0	421	421
YKT6	hits	2.000	12.000	14.000	conv	4	93	97	density	0.905	4.438	5.342	covered_nt	92	572	664
RPL27A	hits	2.000	8.000	10.000	conv	5	92	97	density	1.906	3.242	5.149	covered_nt	70	413	483
MLLT11	hits	0.000	4.000	4.000	conv	0	97	97	density	0	4.6	4.6	covered_nt	0	502	502
DCAF15	hits	0.000	7.000	7.000	conv	0	97	97	density	0	4.578	4.578	covered_nt	0	517	517
TXNDC12	hits	0.020	3.000	3.020	conv	0.158	96	96.158	density	0.006	4.468	4.474	covered_nt	1.396	338	339.396
GPR172A	hits	0.0000	7.0000	7.0000	conv	0	96	96	density	0	12.181	12.181	covered_nt	0	547	547
PSMC5	hits	1.0000	6.0000	7.0000	conv	9	87	96	density	2.749	7.534	10.284	covered_nt	97	360	457
PSMC4	hits	1.0100	7.9900	9.0000	conv	17.02	78.98	96	density	1.634	8.562	10.196	covered_nt	135.495	514.505	650
PPP2R5D	hits	0.9990	9.0000	9.9990	conv	5.001	90.999	96	density	0.366	8.973	9.339	covered_nt	66	585.999	651.999
PEPD	hits	0.0000	8.0010	8.0010	conv	0	96	96	density	0	9.259	9.259	covered_nt	0	428.001	428.001
CTBP1	hits	0.0000	14.0000	14.0000	conv	0	96	96	density	0	8.427	8.427	covered_nt	0	837	837
CARHSP1	hits	0.0000	7.0000	7.0000	conv	0	96	96	density	0	7.819	7.819	covered_nt	0	802	802
OBFC2B	hits	3.000	6.000	9.000	conv	23	73	96	density	2.783	4.956	7.738	covered_nt	242	421	663
NDUFS2	hits	0.0000	6.0000	6.0000	conv	0	96	96	density	0	6.472	6.472	covered_nt	0	346	346
GRPEL1	hits	1.000	6.000	7.000	conv	2	94	96	density	0.77	5.293	6.063	covered_nt	46	575	621
CDCA5	hits	0.000	15.000	15.000	conv	0	96	96	density	0	5.153	5.153	covered_nt	0	891	891
GRN	hits	1.000	2.000	3.000	conv	7	89	96	density	1.136	3.932	5.069	covered_nt	68	329	397
YRDC	hits	0.000	8.000	8.000	conv	0	96	96	density	0	5.004	5.004	covered_nt	0	571	571
TIMP1	hits	0.000	2.000	2.000	conv	0	96	96	density	0	4.764	4.764	covered_nt	0	240	240
GTF2F1	hits	0.000	7.000	7.000	conv	0	96	96	density	0	4.683	4.683	covered_nt	0	630	630
UQCRFS1	hits	0.000	5.000	5.000	conv	0	96	96	density	0	4.059	4.059	covered_nt	0	192	192
DNAJC7	hits	0.0000	6.0010	6.0010	conv	0	95.999	95.999	density	0	9.412	9.412	covered_nt	0	461.001	461.001
EPN1	hits	0.0000	9.0000	9.0000	conv	0	95.001	95.001	density	0	8.598	8.598	covered_nt	0	491.001	491.001
RAB34	hits	4.0080	8.9890	13.0000	conv	27.044	67.956	95	density	10.398	17.898	28.295	covered_nt	302.508	483.49	785.999
SEC13	hits	2.0000	7.0000	9.0000	conv	4	91	95	density	0.502	13.108	13.61	covered_nt	68	516	584
COPS3	hits	1.0000	8.0000	9.0000	conv	2	93	95	density	0.139	7.612	7.751	covered_nt	32	478	510
OAZ2	hits	1.000	13.000	14.000	conv	13	82	95	density	0.835	5.347	6.182	covered_nt	108	761	869
SSNA1	hits	0.000	7.000	7.000	conv	0	95	95	density	0	5.982	5.982	covered_nt	0	586	586
NME3	hits	0.000	3.000	3.000	conv	0	95	95	density	0	5.484	5.484	covered_nt	0	444	444
CDK2AP1	hits	0.000	6.000	6.000	conv	0	95	95	density	0	5.032	5.032	covered_nt	0	512	512
MIDN	hits	1.000	13.000	14.000	conv	2	93	95	density	0.585	4.168	4.753	covered_nt	34	644	678
DR1	hits	0.000	12.000	12.000	conv	0	95	95	density	0	4.213	4.213	covered_nt	0	563	563
MRP63	hits	0.000	7.000	7.000	conv	0	95	95	density	0	4.201	4.201	covered_nt	0	462	462
SENP3	hits	0.500	7.470	7.970	conv	4	90.955	94.955	density	0.567	4.556	5.122	covered_nt	36	562.015	598.015
EEF1E1	hits	1.8630	4.2750	6.1380	conv	24.284	69.765	94.049	density	0.605	6.882	7.487	covered_nt	118.628	318.078	436.706
GIPC1	hits	0.0000	4.9980	4.9980	conv	0	94.002	94.002	density	0	16.175	16.175	covered_nt	0	556.998	556.998
RUSC1	hits	0.0030	6.9960	6.9990	conv	0.04	93.961	94.001	density	0.009	11.191	11.2	covered_nt	0.429	655.571	656
MRPS11	hits	0.0100	3.9900	4.0000	conv	0.089	93.911	94	density	0.004	7.581	7.585	covered_nt	0.277	373.723	374
MRPL17	hits	1.000	5.000	6.000	conv	2	92	94	density	2.525	4.182	6.707	covered_nt	31	406	437
MRPL37	hits	1.000	6.000	7.000	conv	22	72	94	density	1.066	4.839	5.905	covered_nt	183	410	593
PFDN2	hits	0.000	3.000	3.000	conv	0	94	94	density	0	5.67	5.67	covered_nt	0	321	321
RAD23A	hits	0.000	8.000	8.000	conv	0	94	94	density	0	5.276	5.276	covered_nt	0	677	677
ERI3	hits	0.000	9.000	9.000	conv	0	94	94	density	0	5.076	5.076	covered_nt	0	571	571
C20orf4	hits	0.000	10.000	10.000	conv	0	94	94	density	0	4.508	4.508	covered_nt	0	576	576
ACTR1A	hits	0.000	9.000	9.000	conv	0	94	94	density	0	4.402	4.402	covered_nt	0	579	579
GOLPH3	hits	0.000	8.000	8.000	conv	0	94	94	density	0	4.24	4.24	covered_nt	0	479	479
DDX21	hits	0.000	9.000	9.000	conv	0	94	94	density	0	4.148	4.148	covered_nt	0	695	695
ATXN7L3B	hits	0.000	11.000	11.000	conv	0	94	94	density	0	4.009	4.009	covered_nt	0	556	556
PDIA3	hits	0.000	4.000	4.000	conv	0	94	94	density	0	3.313	3.313	covered_nt	0	273	273
PLIN3	hits	0.0000	6.0000	6.0000	conv	0	93.999	93.999	density	0	8.93	8.93	covered_nt	0	480	480
WBP5	hits	0.0000	6.0000	6.0000	conv	0	93	93	density	0	12.957	12.957	covered_nt	0	354	354
ADRM1	hits	0.0000	7.0000	7.0000	conv	0	93	93	density	0	8.83	8.83	covered_nt	0	571	571
CSTF1	hits	0.0000	6.0000	6.0000	conv	0	93	93	density	0	8.809	8.809	covered_nt	0	459.999	459.999
C19orf6	hits	0.0000	13.0000	13.0000	conv	0	93	93	density	0	7.915	7.915	covered_nt	0	773	773
PSMF1	hits	0.0000	10.0000	10.0000	conv	0	93	93	density	0	6.988	6.988	covered_nt	0	758	758
SERP1	hits	1.000	9.000	10.000	conv	14	79	93	density	2.603	4.194	6.797	covered_nt	75	549	624
HDGFRP2	hits	4.0000	4.0000	8.0000	conv	14	79	93	density	0.778	5.887	6.664	covered_nt	171	309	480
PTOV1	hits	1.000	6.000	7.000	conv	8	85	93	density	0.831	4.314	5.145	covered_nt	60	356	416
TRAPPC4	hits	0.000	4.000	4.000	conv	0	93	93	density	0	4.861	4.861	covered_nt	0	337	337
GRWD1	hits	0.000	6.000	6.000	conv	0	93	93	density	0	4.441	4.441	covered_nt	0	509	509
ARPP19	hits	0.000	13.000	13.000	conv	0	93	93	density	0	3.617	3.617	covered_nt	0	582	582
RNASEK-C17ORF49	hits	0.274	2.082	2.357	conv	7.726	84.661	92.387	density	0.818	3.622	4.44	covered_nt	24.432	216.019	240.451
TBRG4	hits	0.9990	3.9990	5.0010	conv	3	89.001	92.001	density	0.455	8.185	8.641	covered_nt	32.001	339.999	372
TSFM	hits	0.0130	5.9870	6.0000	conv	0.276	91.725	92	density	0.009	11.52	11.528	covered_nt	1.059	422.94	424
AK2	hits	0.0300	6.9700	7.0000	conv	0.93	91.067	92	density	0.018	9.848	9.868	covered_nt	3.369	488.63	491.999
ARRB2	hits	2.0000	7.0000	9.0000	conv	5	87	92	density	1.148	7.387	8.535	covered_nt	89	453	542
CDKN2C	hits	1.0000	4.0000	5.0000	conv	3	89	92	density	1.03	7.213	8.244	covered_nt	31	371	402
KIAA1967	hits	0.0000	10.0000	10.0000	conv	0	92	92	density	0	6.278	6.278	covered_nt	0	609	609
TMED3	hits	0.000	6.000	6.000	conv	0	92	92	density	0	5.14	5.14	covered_nt	0	476	476
AKR1B1	hits	0.000	8.000	8.000	conv	0	92	92	density	0	5.127	5.127	covered_nt	0	475	475
TWF2	hits	0.000	8.000	8.000	conv	0	92	92	density	0	5.049	5.049	covered_nt	0	522	522
GNG5	hits	0.000	5.000	5.000	conv	0	92	92	density	0	4.913	4.913	covered_nt	0	235	235
SNX17	hits	0.000	4.000	4.000	conv	0	92	92	density	0	4.681	4.681	covered_nt	0	504	504
C22orf32	hits	0.000	3.000	3.000	conv	0	92	92	density	0	4.552	4.552	covered_nt	0	353	353
JPX	hits	7.000	1.000	8.000	conv	81	11	92	density	0.475	2.472	2.947	covered_nt	485	76	561
ECSIT	hits	0.0100	5.9910	6.0010	conv	0.037	91.962	91.999	density	0.003	12.462	12.465	covered_nt	0.478	453.523	454.001
PIN4	hits	0.0350	7.9650	8.0000	conv	0.438	91.561	91.999	density	0.003	8.301	8.304	covered_nt	1.612	349.388	351
AKR1A1	hits	0.0000	6.0000	6.0000	conv	0	91	91	density	0	13.353	13.353	covered_nt	0	536	536
ATP5I	hits	1.0100	1.9900	3.0000	conv	84.03	6.97	91	density	4.076	7.838	11.914	covered_nt	97.297	99.703	197
MPDU1	hits	1.0000	6.0000	7.0000	conv	8	83	91	density	1.523	8.41	9.933	covered_nt	41	564	605
TMED4	hits	1.000	5.000	6.000	conv	9	82	91	density	2.485	5.778	8.262	covered_nt	94	551	645
NT5DC2	hits	0.0000	10.0000	10.0000	conv	0	91	91	density	0	7.847	7.847	covered_nt	0	552	552
TCP1	hits	0.0000	12.0000	12.0000	conv	0	91	91	density	0	7.728	7.728	covered_nt	0	654	654
ARPC5L	hits	0.000	11.000	11.000	conv	0	91	91	density	0	5.966	5.966	covered_nt	0	631	631
POLR2K	hits	0.000	8.000	8.000	conv	0	91	91	density	0	5.652	5.652	covered_nt	0	479	479
GRSF1	hits	0.0000	13.0000	13.0000	conv	0	91	91	density	0	5.334	5.334	covered_nt	0	701	701
POLR2J	hits	0.000	2.000	2.000	conv	0	91	91	density	0	4.968	4.968	covered_nt	0	296	296
EIF3H	hits	0.000	8.000	8.000	conv	0	91	91	density	0	4.922	4.922	covered_nt	0	374	374
YWHAG	hits	0.000	15.000	15.000	conv	0	91	91	density	0	4.241	4.241	covered_nt	0	671	671
MAPK1IP1L	hits	2.000	9.000	11.000	conv	5	86	91	density	0.85	3.21	4.06	covered_nt	97	534	631
NOC2L	hits	0.000	7.000	7.000	conv	0	91	91	density	0	3.558	3.558	covered_nt	0	302	302
PUS1	hits	2.0190	6.9800	8.9990	conv	39.04	51.961	90.999	density	1.746	8.642	10.387	covered_nt	191.451	338.548	529.999
PDCD4	hits	2.0010	8.7510	10.7490	conv	3.999	86.25	90.249	density	0.339	6.357	6.696	covered_nt	60	363.999	423.999
TPD52L2	hits	0.0020	7.9950	7.9970	conv	0.008	89.994	90.004	density	0	19.654	19.654	covered_nt	0.058	625.942	626
MANEAL	hits	0.0000	14.0010	14.0010	conv	0	90	90	density	0	9.668	9.668	covered_nt	0	658	658
DNM2	hits	0.0000	9.0000	9.0000	conv	0	90	90	density	0	9.197	9.197	covered_nt	0	472	472
GDI2	hits	0.0000	8.0000	8.0000	conv	0	90	90	density	0	7.03	7.03	covered_nt	0	489	489
NSUN2	hits	0.0000	3.9990	3.9990	conv	0	90	90	density	0	6.357	6.357	covered_nt	0	332.001	332.001
MED24	hits	1.0000	8.0000	9.0000	conv	3	87	90	density	0.172	5.626	5.798	covered_nt	39	447	486
POLR3K	hits	0.000	3.000	3.000	conv	0	90	90	density	0	5.42	5.42	covered_nt	0	345	345
DPM2	hits	0.000	6.000	6.000	conv	0	90	90	density	0	5.363	5.363	covered_nt	0	621	621
PPP1R7	hits	4.000	3.000	7.000	conv	22	68	90	density	0.697	4.596	5.293	covered_nt	194	300	494
AIP	hits	0.000	7.000	7.000	conv	0	90	90	density	0	5.228	5.228	covered_nt	0	450	450
BASP1	hits	0.000	5.000	5.000	conv	0	90	90	density	0	4.649	4.649	covered_nt	0	433	433
HDAC1	hits	1.000	4.000	5.000	conv	6	84	90	density	0.169	4.433	4.602	covered_nt	49	431	480
PRPF31	hits	1.000	4.000	5.000	conv	5	85	90	density	0.428	3.968	4.397	covered_nt	49	320	369
ATP2A2	hits	0.0690	7.9310	8.0000	conv	0.871	89.129	90	density	0.012	3.475	3.487	covered_nt	5.525	588.475	594
DYNLL1	hits	0.0050	3.9960	4.0010	conv	0.01	89.989	89.999	density	0.002	11.108	11.109	covered_nt	0.308	275.691	276
GAS5	hits	4.010	3.000	7.010	conv	42.149	47	89.149	density	2.809	4.47	7.28	covered_nt	207.653	134	341.653
CTNNB1	hits	0.0000	9.9990	9.9990	conv	0	89.001	89.001	density	0	7.469	7.469	covered_nt	0	479.001	479.001
TROAP	hits	1.0100	5.9900	7.0000	conv	47.03	41.97	89	density	6.226	7.385	13.611	covered_nt	228.267	359.733	588
C12orf57	hits	1.000	4.000	5.000	conv	37	52	89	density	3.758	5.98	9.738	covered_nt	178	338	516
ERGIC3	hits	1.0000	10.0000	11.0000	conv	5	84	89	density	0.431	8.297	8.728	covered_nt	46	455	501
SKP1	hits	0.0000	6.0000	6.0000	conv	0	89	89	density	0	6.084	6.084	covered_nt	0	337	337
PCBD1	hits	0.000	7.000	7.000	conv	0	89	89	density	0	5.87	5.87	covered_nt	0	579	579
SNF8	hits	0.000	7.000	7.000	conv	0	89	89	density	0	5.15	5.15	covered_nt	0	419	419
FLOT2	hits	1.000	11.000	12.000	conv	5	84	89	density	0.312	4.784	5.096	covered_nt	38	699	737
FXR2	hits	0.000	9.000	9.000	conv	0	89	89	density	0	4.411	4.411	covered_nt	0	606	606
ALKBH5	hits	0.000	13.000	13.000	conv	0	89	89	density	0	4.298	4.298	covered_nt	0	641	641
DCUN1D5	hits	1.000	6.000	7.000	conv	17	72	89	density	0.506	1.888	2.394	covered_nt	121	344	465
APLP2	hits	0.0000	11.9980	11.9980	conv	0	88.998	88.998	density	0	11.559	11.559	covered_nt	0	525	525
CTSD	hits	0.000	8.911	8.911	conv	0	88.119	88.119	density	0	4.804	4.804	covered_nt	0	572.277	572.277
COMT	hits	1.0000	6.0000	7.0000	conv	5	83	88	density	0.58	9.8	10.38	covered_nt	50	396	446
DGUOK	hits	0.0000	6.0000	6.0000	conv	0	88	88	density	0	8.582	8.582	covered_nt	0	373	373
RHBDD2	hits	0.0000	9.0000	9.0000	conv	0	88	88	density	0	8.287	8.287	covered_nt	0	606	606
ZNF444	hits	0.0000	10.0000	10.0000	conv	0	88	88	density	0	8.06	8.06	covered_nt	0	633	633
NAT14	hits	1.000	6.000	7.000	conv	4	84	88	density	1.649	5.462	7.111	covered_nt	22	582	604
TMEM179B	hits	1.000	6.000	7.000	conv	2	86	88	density	1.281	5.214	6.495	covered_nt	28	377	405
ATP5O	hits	0.000	6.000	6.000	conv	0	88	88	density	0	5.867	5.867	covered_nt	0	463	463
C17orf79	hits	0.000	6.000	6.000	conv	0	88	88	density	0	5.788	5.788	covered_nt	0	509	509
COBRA1	hits	0.000	10.000	10.000	conv	0	88	88	density	0	4.632	4.632	covered_nt	0	611	611
CLIC4	hits	0.000	10.000	10.000	conv	0	88	88	density	0	3.911	3.911	covered_nt	0	623	623
PTP4A2	hits	0.0000	11.0010	11.0010	conv	0	87.999	87.999	density	0	8.084	8.084	covered_nt	0	591	591
FLAD1	hits	0.0770	10.9220	11.0010	conv	1.264	85.735	87.001	density	0.112	11.909	12.022	covered_nt	6.174	560.826	567
DIABLO	hits	0.0100	5.9900	6.0000	conv	0.02	86.98	87	density	0.002	12.162	12.164	covered_nt	0.208	625.792	626
G6PC3	hits	0.0000	8.0010	8.0010	conv	0	87	87	density	0	10.797	10.797	covered_nt	0	554.001	554.001
CECR5	hits	0.0000	9.0000	9.0000	conv	0	87	87	density	0	8.774	8.774	covered_nt	0	703	703
FAM189B	hits	0.0100	12.9900	13.0000	conv	0.03	86.97	87	density	0.015	7.522	7.537	covered_nt	0.545	766.455	767
PKMYT1	hits	0.0000	7.0000	7.0000	conv	0	87	87	density	0	6.506	6.506	covered_nt	0	374	374
TES	hits	0.0000	7.0000	7.0000	conv	0	87	87	density	0	6.423	6.423	covered_nt	0	446	446
RPN2	hits	1.0000	6.0000	7.0000	conv	3	84	87	density	0.074	6.205	6.279	covered_nt	31	377	408
EFTUD2	hits	0.0000	5.0000	5.0000	conv	0	87	87	density	0	5.948	5.948	covered_nt	0	564	564
MRPL34	hits	0.000	6.000	6.000	conv	0	87	87	density	0	5.555	5.555	covered_nt	0	446	446
LCP1	hits	0.000	5.000	5.000	conv	0	87	87	density	0	3.965	3.965	covered_nt	0	554	554
DDB1	hits	0.000	10.000	10.000	conv	0	87	87	density	0	3.932	3.932	covered_nt	0	619	619
TXNDC17	hits	0.000	3.000	3.000	conv	0	87	87	density	0	3.437	3.437	covered_nt	0	204	204
SF3B1	hits	0.0000	4.0000	4.0000	conv	0	87	87	density	0	3.216	3.216	covered_nt	0	356	356
MAGED1	hits	0.9990	5.0010	6.0000	conv	3.999	81.999	86.001	density	1.303	7.439	8.744	covered_nt	96.999	380.001	477
PPIE	hits	0.0340	5.9680	6.0020	conv	0.51	85.491	86.001	density	0.016	8.527	8.543	covered_nt	2.59	457.41	460
MDH1	hits	0.0000	2.0010	2.0010	conv	0	86.001	86.001	density	0	7.814	7.814	covered_nt	0	225	225
PPP6C	hits	0.0000	3.9990	3.9990	conv	0	86.001	86.001	density	0	6.208	6.208	covered_nt	0	408	408
MRPL55	hits	0.0000	3.0000	3.0000	conv	0	86	86	density	0	20.782	20.782	covered_nt	0	283	283
PDCD2	hits	1.0200	12.9780	13.9980	conv	10.12	75.882	86	density	0.714	14.486	15.2	covered_nt	33.9	576.098	610
GART	hits	1.0870	8.9120	9.9990	conv	3.077	82.923	86	density	0.246	9.978	10.224	covered_nt	48.96	597.039	645.999
ATP5C1	hits	2.0000	9.0000	11.0000	conv	30	56	86	density	0.639	7.602	8.241	covered_nt	92	292	384
C3orf37	hits	0.0000	2.0000	2.0000	conv	0	86	86	density	0	8.023	8.023	covered_nt	0	516	516
RFC3	hits	1.0690	8.9310	10.0000	conv	2.752	83.248	86	density	0.036	7.883	7.919	covered_nt	37.139	652.861	690
TIMM22	hits	3.000	7.000	10.000	conv	28	58	86	density	2.674	4.992	7.666	covered_nt	181	516	697
TXN	hits	0.0000	3.0000	3.0000	conv	0	86	86	density	0	7.12	7.12	covered_nt	0	181	181
MTA1	hits	0.0000	7.0000	7.0000	conv	0	86	86	density	0	5.517	5.517	covered_nt	0	325	325
MRPL22	hits	0.0100	4.9900	5.0000	conv	0.05	85.95	86	density	0.003	5.262	5.265	covered_nt	0.545	327.455	328
MTCH1	hits	1.000	9.000	10.000	conv	15	71	86	density	0.519	4.629	5.149	covered_nt	70	447	517
YWHAH	hits	0.000	8.000	8.000	conv	0	86	86	density	0	5.022	5.022	covered_nt	0	565	565
HOXB2	hits	0.000	10.000	10.000	conv	0	86	86	density	0	4.995	4.995	covered_nt	0	495	495
PSMD14	hits	0.000	6.000	6.000	conv	0	86	86	density	0	4.773	4.773	covered_nt	0	452	452
MRPL15	hits	0.000	7.000	7.000	conv	0	86	86	density	0	4.761	4.761	covered_nt	0	457	457
PHB	hits	0.000	6.000	6.000	conv	0	86	86	density	0	4.548	4.548	covered_nt	0	409	409
VTA1	hits	0.000	9.000	9.000	conv	0	86	86	density	0	4.436	4.436	covered_nt	0	670	670
GINS1	hits	0.000	7.000	7.000	conv	0	86	86	density	0	3.867	3.867	covered_nt	0	447	447
YWHAQ	hits	1.000	5.000	6.000	conv	29	57	86	density	0.147	3.473	3.62	covered_nt	48	219	267
GUK1	hits	1.0570	8.9420	9.9990	conv	4.174	81.825	85.999	density	0.746	17.152	17.9	covered_nt	34.244	492.757	527.001
RTN4	hits	1.0000	10.0000	11.0000	conv	2	83	85	density	0.06	11.784	11.843	covered_nt	26	590	616
ISOC2	hits	0.0050	5.9950	6.0000	conv	0.02	84.98	85	density	0.006	11.573	11.579	covered_nt	0.308	432.691	432.999
BRP44	hits	2.0190	4.9800	7.0000	conv	25.079	59.922	85	density	1.035	9.251	10.286	covered_nt	144.608	507.392	652
POLD2	hits	0.0100	14.9900	15.0000	conv	0.059	84.941	85	density	0.014	9.239	9.254	covered_nt	0.733	799.267	800
ANXA2	hits	1.0000	2.0000	3.0000	conv	3	82	85	density	0.084	8.647	8.731	covered_nt	29	225	254
CKAP2	hits	2.0000	8.0000	10.0000	conv	10	75	85	density	0.666	5.753	6.419	covered_nt	91	474	565
BTG3	hits	0.0000	4.0000	4.0000	conv	0	85	85	density	0	6.261	6.261	covered_nt	0	237	237
NDUFB7	hits	0.000	6.000	6.000	conv	0	85	85	density	0	6.058	6.058	covered_nt	0	359	359
CDC25A	hits	0.0000	12.0000	12.0000	conv	0	85	85	density	0	5.968	5.968	covered_nt	0	504	504
NDUFB9	hits	1.000	4.000	5.000	conv	2	83	85	density	0.384	5.537	5.921	covered_nt	31	327	358
TMEM109	hits	0.000	12.000	12.000	conv	0	85	85	density	0	5.087	5.087	covered_nt	0	788	788
PIGS	hits	1.000	9.000	10.000	conv	3	82	85	density	0.206	4.618	4.824	covered_nt	24	677	701
PFKP	hits	0.0000	2.0000	2.0000	conv	0	85	85	density	0	4.783	4.783	covered_nt	0	231	231
PREB	hits	0.000	6.000	6.000	conv	0	85	85	density	0	4.621	4.621	covered_nt	0	511	511
C22orf28	hits	0.000	4.000	4.000	conv	0	85	85	density	0	4.59	4.59	covered_nt	0	477	477
STC2	hits	0.000	13.000	13.000	conv	0	85	85	density	0	3.687	3.687	covered_nt	0	635	635
SCAF1	hits	0.000	8.000	8.000	conv	0	85	85	density	0	3.641	3.641	covered_nt	0	495	495
MRPS25	hits	1.000	2.000	3.000	conv	2	83	85	density	0.239	3.052	3.29	covered_nt	22	333	355
GSTO1	hits	0.0000	3.0000	3.0000	conv	0	84.999	84.999	density	0	9.819	9.819	covered_nt	0	257.001	257.001
SOD2	hits	2.0450	4.9560	7.0000	conv	7.148	76.853	84.001	density	0.843	9.798	10.642	covered_nt	89.891	413.109	503
SIRT2	hits	0.0000	9.0000	9.0000	conv	0	84	84	density	0	11.592	11.592	covered_nt	0	519	519
TCEB2	hits	2.0300	6.9700	9.0000	conv	13.228	70.772	84	density	1.886	9.329	11.215	covered_nt	93.832	418.168	512
TCEAL4	hits	0.0000	5.0010	5.0010	conv	0	84	84	density	0	10.455	10.455	covered_nt	0	399	399
DOLPP1	hits	2.0100	12.9900	15.0000	conv	6.05	77.95	84	density	1.478	8.111	9.589	covered_nt	96.683	663.317	760
RTN3	hits	1.0000	9.0000	10.0000	conv	2	82	84	density	0.045	7.937	7.984	covered_nt	24	355	379
IMPDH2	hits	1.000	10.000	11.000	conv	24	60	84	density	1.8	4.862	6.662	covered_nt	85	475	560
POLR2H	hits	0.000	2.000	2.000	conv	0	84	84	density	0	5.215	5.215	covered_nt	0	297	297
AKIRIN2	hits	3.000	9.000	12.000	conv	7	77	84	density	0.411	4.679	5.091	covered_nt	84	476	560
PTTG1	hits	0.000	4.000	4.000	conv	0	84	84	density	0	4.881	4.881	covered_nt	0	203	203
C19orf54	hits	0.000	13.000	13.000	conv	0	84	84	density	0	4.778	4.778	covered_nt	0	728	728
OXA1L	hits	0.000	7.000	7.000	conv	0	84	84	density	0	4.651	4.651	covered_nt	0	415	415
C20orf111	hits	1.000	6.000	7.000	conv	3	81	84	density	0.278	4.366	4.643	covered_nt	27	440	467
SNW1	hits	0.000	5.000	5.000	conv	0	84	84	density	0	4.298	4.298	covered_nt	0	397	397
CDC5L	hits	0.000	5.000	5.000	conv	0	84	84	density	0	2.609	2.609	covered_nt	0	328	328
SLMO2	hits	0.000	10.784	10.784	conv	0	83.333	83.333	density	0	4.611	4.611	covered_nt	0	600.98	600.98
MINOS1	hits	1.4300	4.7000	6.1250	conv	15.715	67.6	83.31	density	0.193	6.607	6.8	covered_nt	39.285	286.055	325.34
RBM4	hits	2.4450	4.4700	6.9150	conv	18.369	64.801	83.169	density	1.597	6.349	7.947	covered_nt	121.636	213.493	335.129
MATR3	hits	4.0390	9.9900	14.0300	conv	13.089	69.97	83.058	density	0.4	7.437	7.836	covered_nt	130.204	413.612	543.814
GSPT1	hits	0.0000	6.9990	6.9990	conv	0	83.001	83.001	density	0	5.161	5.161	covered_nt	0	492.999	492.999
FAM195B	hits	0.0300	8.9700	9.0000	conv	0.347	82.653	83	density	0.28	9.308	9.587	covered_nt	2.723	561.277	564
BCKDHA	hits	0.0000	6.0000	6.0000	conv	0	83	83	density	0	7.477	7.477	covered_nt	0	438	438
CXXC1	hits	0.0000	7.0000	7.0000	conv	0	83	83	density	0	6.782	6.782	covered_nt	0	562	562
CENPW	hits	1.000	2.000	3.000	conv	2	81	83	density	0.422	5.424	5.845	covered_nt	27	231	258
NME4	hits	0.000	5.000	5.000	conv	0	83	83	density	0	5.793	5.793	covered_nt	0	549	549
TSR2	hits	0.000	8.000	8.000	conv	0	83	83	density	0	5.374	5.374	covered_nt	0	537	537
MPI	hits	0.000	9.000	9.000	conv	0	83	83	density	0	5.33	5.33	covered_nt	0	695	695
LSM3	hits	0.000	4.000	4.000	conv	0	83	83	density	0	4.922	4.922	covered_nt	0	204	204
CCNA2	hits	0.000	8.000	8.000	conv	0	83	83	density	0	4.451	4.451	covered_nt	0	584	584
LEPROTL1	hits	0.0500	4.9500	5.0000	conv	0.822	82.178	83	density	0.016	4.176	4.192	covered_nt	4.634	463.366	468
MAP2K2	hits	1.000	2.000	3.000	conv	15	68	83	density	0.336	3.641	3.977	covered_nt	84	199	283
TMEM123	hits	0.000	8.000	8.000	conv	0	83	83	density	0	3.872	3.872	covered_nt	0	490	490
NIT1	hits	0.0070	2.9920	2.9990	conv	0.269	82.73	82.999	density	0.021	8.248	8.268	covered_nt	0.761	253.24	254.001
RBM14-RBM4	hits	2.7060	5.2700	7.9770	conv	15.385	67.601	82.986	density	0.496	6.94	7.438	covered_nt	107.461	249.093	356.553
TXNDC5	hits	0.0000	8.6660	8.6660	conv	0	82.666	82.666	density	0	6.81	6.81	covered_nt	0	616.666	616.666
HNRNPC	hits	1.0000	6.0000	7.0000	conv	12	70	82	density	0.088	6.48	6.568	covered_nt	35	267	302
DDX47	hits	0.0000	3.0000	3.0000	conv	0	82	82	density	0	6.519	6.519	covered_nt	0	299	299
UBE2D2	hits	1.0000	8.0000	9.0000	conv	22	60	82	density	0.172	6.315	6.486	covered_nt	79	441	520
C19orf24	hits	0.000	4.000	4.000	conv	0	82	82	density	0	5.819	5.819	covered_nt	0	497	497
MRPL48	hits	0.000	5.000	5.000	conv	0	82	82	density	0	5.305	5.305	covered_nt	0	378	378
CUEDC2	hits	0.000	7.000	7.000	conv	0	82	82	density	0	5.157	5.157	covered_nt	0	415	415
VAMP2	hits	0.000	12.000	12.000	conv	0	82	82	density	0	4.773	4.773	covered_nt	0	568	568
RPL19	hits	0.000	4.000	4.000	conv	0	82	82	density	0	4.676	4.676	covered_nt	0	180	180
ATP6V1G1	hits	0.000	7.000	7.000	conv	0	82	82	density	0	4.615	4.615	covered_nt	0	379	379
RNF114	hits	0.000	7.000	7.000	conv	0	82	82	density	0	4.477	4.477	covered_nt	0	525	525
CCNB2	hits	0.000	2.000	2.000	conv	0	82	82	density	0	3.956	3.956	covered_nt	0	225	225
MCTS1	hits	0.0000	3.0000	3.0000	conv	0	82	82	density	0	1.785	1.785	covered_nt	0	166	166
SLC25A11	hits	0.0000	5.0010	5.0010	conv	0	81.999	81.999	density	0	9.705	9.705	covered_nt	0	441.999	441.999
UBE2L3	hits	0.0200	13.9800	14.0000	conv	0.04	81.961	81.999	density	0.002	9.214	9.215	covered_nt	0.47	647.529	647.999
C16orf13	hits	3.0000	3.0000	6.0000	conv	30	51	81	density	10.126	12.75	22.877	covered_nt	187	167	354
FXYD5	hits	0.0000	4.0000	4.0000	conv	0	81	81	density	0	13.536	13.536	covered_nt	0	391	391
RFC5	hits	1.0000	14.0000	15.0000	conv	2	79	81	density	0.213	12.223	12.436	covered_nt	20	651	671
MRPS33	hits	0.0000	5.0000	5.0000	conv	0	81	81	density	0	8.997	8.997	covered_nt	0	310	310
ACTL6A	hits	0.0000	3.9990	3.9990	conv	0	81	81	density	0	8.427	8.427	covered_nt	0	329.001	329.001
CTDNEP1	hits	1.0000	6.0000	7.0000	conv	6	75	81	density	0.433	5.747	6.18	covered_nt	23	225	248
TST	hits	0.000	3.000	3.000	conv	0	81	81	density	0	5.144	5.144	covered_nt	0	388	388
HPRT1	hits	0.000	6.000	6.000	conv	0	81	81	density	0	5.128	5.128	covered_nt	0	481	481
SEPHS2	hits	0.000	10.000	10.000	conv	0	81	81	density	0	4.927	4.927	covered_nt	0	669	669
BLMH	hits	0.000	7.000	7.000	conv	0	81	81	density	0	4.73	4.73	covered_nt	0	648	648
AAMP	hits	0.000	4.000	4.000	conv	0	81	81	density	0	4.671	4.671	covered_nt	0	439	439
SAR1B	hits	0.0000	8.0000	8.0000	conv	0	81	81	density	0	4.457	4.457	covered_nt	0	486	486
MRPS18C	hits	0.000	5.000	5.000	conv	0	81	81	density	0	4.414	4.414	covered_nt	0	228	228
SF3A3	hits	0.000	7.000	7.000	conv	0	81	81	density	0	3.837	3.837	covered_nt	0	377	377
ABCF2	hits	0.0590	5.9410	6.0000	conv	0.802	80.198	81	density	0.035	3.7	3.735	covered_nt	4.257	425.743	430
TMED10	hits	0.000	11.000	11.000	conv	0	81	81	density	0	3.608	3.608	covered_nt	0	464	464
CLPTM1	hits	0.0000	6.0000	6.0000	conv	0	80.001	80.001	density	0	8.584	8.584	covered_nt	0	470.001	470.001
MLST8	hits	1.0000	6.0000	7.0000	conv	3	77	80	density	4.111	12.112	16.222	covered_nt	93	531	624
RPL31	hits	1.0630	8.9360	10.0000	conv	2.389	77.61	80	density	0.297	11.583	11.88	covered_nt	33.921	343.078	376.999
BTF3	hits	1.0200	6.9800	8.0000	conv	2.129	77.871	80	density	0.642	8.334	8.976	covered_nt	30.257	400.743	431
MRPL47	hits	1.0100	7.9900	9.0000	conv	9.03	70.97	80	density	0.438	8.116	8.554	covered_nt	49.485	349.515	399
ACIN1	hits	0.0000	5.0000	5.0000	conv	0	80	80	density	0	7.752	7.752	covered_nt	0	353	353
ZYX	hits	0.0000	6.0000	6.0000	conv	0	80	80	density	0	6.917	6.917	covered_nt	0	461	461
PHF5A	hits	0.000	7.000	7.000	conv	0	80	80	density	0	5.261	5.261	covered_nt	0	398	398
PSMC2	hits	0.0000	5.0000	5.0000	conv	0	80	80	density	0	4.838	4.838	covered_nt	0	292	292
UBE2N	hits	0.000	8.000	8.000	conv	0	80	80	density	0	4.207	4.207	covered_nt	0	446	446
PTTG1IP	hits	0.000	7.000	7.000	conv	0	80	80	density	0	4.028	4.028	covered_nt	0	433	433
CSTF3	hits	0.0300	3.9700	4.0000	conv	0.461	79.538	79.999	density	0.005	9.794	9.799	covered_nt	1.817	304.183	306
UXT	hits	1.0000	5.0000	6.0000	conv	18	61	79	density	1.165	14.281	15.447	covered_nt	60	298	358
ACP1	hits	0.0070	10.9920	10.9990	conv	0.017	78.984	79	density	0.003	12.66	12.663	covered_nt	0.206	518.793	518.999
TMUB1	hits	0.0000	6.0000	6.0000	conv	0	79	79	density	0	8.22	8.22	covered_nt	0	504	504
NDUFV3	hits	1.0000	2.0000	3.0000	conv	3	76	79	density	0.261	6.617	6.878	covered_nt	28	263	291
ANXA7	hits	0.0000	6.0000	6.0000	conv	0	79	79	density	0	6.584	6.584	covered_nt	0	382	382
COX4I1	hits	2.000	5.000	7.000	conv	6	73	79	density	0.977	5.436	6.413	covered_nt	64	349	413
WDR1	hits	0.0000	6.0000	6.0000	conv	0	79	79	density	0	6.176	6.176	covered_nt	0	439	439
ATP6V0E2	hits	0.0200	6.9800	7.0000	conv	0.139	78.861	79	density	0.024	6.097	6.12	covered_nt	0.842	393.158	394
C10orf35	hits	0.000	6.000	6.000	conv	0	79	79	density	0	5.305	5.305	covered_nt	0	415	415
APOA1BP	hits	0.000	6.000	6.000	conv	0	79	79	density	0	5.224	5.224	covered_nt	0	408	408
PBK	hits	1.000	5.000	6.000	conv	2	77	79	density	0.121	5.069	5.189	covered_nt	23	604	627
ESD	hits	3.000	3.000	6.000	conv	8	71	79	density	0.425	4.722	5.148	covered_nt	85	303	388
SEC11A	hits	0.000	7.000	7.000	conv	0	79	79	density	0	4.94	4.94	covered_nt	0	411	411
SYNGR2	hits	0.000	7.000	7.000	conv	0	79	79	density	0	4.678	4.678	covered_nt	0	417	417
GTPBP4	hits	1.000	7.000	8.000	conv	2	77	79	density	0.124	4.444	4.568	covered_nt	24	523	547
UBE2B	hits	0.000	7.000	7.000	conv	0	79	79	density	0	4.45	4.45	covered_nt	0	549	549
MCM6	hits	2.000	6.000	8.000	conv	9	70	79	density	0.266	3.673	3.939	covered_nt	67	441	508
CPNE1	hits	1.1030	5.5980	6.7010	conv	2.445	76.198	78.643	density	0.116	12.761	12.875	covered_nt	27.834	369.402	397.235
AKT2	hits	1.0290	9.9990	11.0280	conv	23.145	54.999	78.147	density	0.369	6.492	6.861	covered_nt	132.786	548.001	680.787
GRINA	hits	0.0000	7.0000	7.0000	conv	0	78	78	density	0	7.678	7.678	covered_nt	0	509	509
NSUN5	hits	0.0000	3.0000	3.0000	conv	0	78	78	density	0	7.068	7.068	covered_nt	0	229	229
C4orf3	hits	0.0000	9.0000	9.0000	conv	0	78	78	density	0	6.873	6.873	covered_nt	0	570	570
HIST1H1C	hits	0.000	6.000	6.000	conv	0	78	78	density	0	5.988	5.988	covered_nt	0	458	458
CD2BP2	hits	0.0000	9.0000	9.0000	conv	0	78	78	density	0	5.791	5.791	covered_nt	0	447	447
SDHAF1	hits	0.000	9.000	9.000	conv	0	78	78	density	0	5.553	5.553	covered_nt	0	520	520
LOC400043	hits	0.000	8.000	8.000	conv	0	78	78	density	0	5.537	5.537	covered_nt	0	634	634
CNIH	hits	0.000	7.000	7.000	conv	0	78	78	density	0	5.461	5.461	covered_nt	0	613	613
COX5A	hits	1.000	5.000	6.000	conv	37	41	78	density	0.465	4.954	5.419	covered_nt	65	231	296
MPV17L2	hits	0.000	8.000	8.000	conv	0	78	78	density	0	5.232	5.232	covered_nt	0	497	497
SH3BGRL3	hits	0.000	5.000	5.000	conv	0	78	78	density	0	5.2	5.2	covered_nt	0	399	399
YIPF3	hits	0.000	6.000	6.000	conv	0	78	78	density	0	5.102	5.102	covered_nt	0	526	526
PSMC3	hits	0.000	10.000	10.000	conv	0	78	78	density	0	4.947	4.947	covered_nt	0	472	472
SESN2	hits	0.000	14.000	14.000	conv	0	78	78	density	0	4.75	4.75	covered_nt	0	914	914
MRPL9	hits	0.000	7.000	7.000	conv	0	78	78	density	0	4.682	4.682	covered_nt	0	319	319
MAT2A	hits	0.000	7.000	7.000	conv	0	78	78	density	0	3.474	3.474	covered_nt	0	304	304
SPCS3	hits	0.000	9.000	9.000	conv	0	78	78	density	0	3.268	3.268	covered_nt	0	397	397
PABPC1	hits	0.000	6.000	6.000	conv	0	78	78	density	0	3.22	3.22	covered_nt	0	238	238
FKBP1A	hits	1.5000	3.9800	5.4800	conv	12	65.672	77.672	density	0.697	6.314	7.011	covered_nt	114.75	249.752	364.502
SKA2	hits	0.0200	9.0000	9.0200	conv	0.04	77	77.04	density	0.002	6.423	6.425	covered_nt	0.588	491	491.588
PLS3	hits	0.9990	5.0010	6.0000	conv	2.001	75	77.001	density	0.104	7.815	7.918	covered_nt	45	516.999	561.999
UBE2J2	hits	0.0000	5.0000	5.0000	conv	0	77	77	density	0	11.047	11.047	covered_nt	0	525	525
VPS29	hits	0.0000	7.0000	7.0000	conv	0	77	77	density	0	8.513	8.513	covered_nt	0	397	397
DKC1	hits	0.0000	6.0000	6.0000	conv	0	77	77	density	0	7.077	7.077	covered_nt	0	546	546
NGDN	hits	0.0000	2.0000	2.0000	conv	0	77	77	density	0	5.928	5.928	covered_nt	0	183	183
SEC61B	hits	0.000	6.000	6.000	conv	0	77	77	density	0	5.88	5.88	covered_nt	0	326	326
SDF2L1	hits	0.000	4.000	4.000	conv	0	77	77	density	0	5.671	5.671	covered_nt	0	437	437
CREG1	hits	1.000	6.000	7.000	conv	12	65	77	density	1.117	4.311	5.428	covered_nt	126	382	508
TOR1AIP2	hits	0.1380	12.8630	13.0010	conv	1.176	75.824	77	density	0.036	5.156	5.192	covered_nt	7.45	597.549	604.999
NDUFA6	hits	0.000	6.000	6.000	conv	0	77	77	density	0	4.995	4.995	covered_nt	0	366	366
RHOG	hits	0.000	5.000	5.000	conv	0	77	77	density	0	4.979	4.979	covered_nt	0	403	403
BRF2	hits	0.000	6.000	6.000	conv	0	77	77	density	0	4.909	4.909	covered_nt	0	581	581
DDIT4	hits	0.000	10.000	10.000	conv	0	77	77	density	0	4.884	4.884	covered_nt	0	500	500
EEF1A1	hits	0.000	14.000	14.000	conv	0	77	77	density	0	4.424	4.424	covered_nt	0	719	719
ENO2	hits	0.000	10.000	10.000	conv	0	77	77	density	0	4.399	4.399	covered_nt	0	487	487
KRT19	hits	0.000	2.000	2.000	conv	0	77	77	density	0	3.893	3.893	covered_nt	0	204	204
C14orf119	hits	0.000	7.000	7.000	conv	0	77	77	density	0	3.876	3.876	covered_nt	0	403	403
BCAT2	hits	1.0030	5.9960	6.9990	conv	3.01	72.991	76.001	density	0.22	12.388	12.607	covered_nt	22.193	495.807	518
PIGT	hits	0.0000	4.0000	4.0000	conv	0	76	76	density	0	9.468	9.468	covered_nt	0	345	345
C1orf86	hits	2.0200	2.9800	5.0000	conv	32.317	43.683	76	density	2.393	5.78	8.173	covered_nt	220.644	212.356	433
ECI1	hits	0.0100	4.9900	5.0000	conv	0.03	75.97	76	density	0.003	7.514	7.517	covered_nt	0.218	257.782	258
POLE3	hits	0.0000	10.0000	10.0000	conv	0	76	76	density	0	7.455	7.455	covered_nt	0	571	571
GMDS	hits	0.0000	5.0000	5.0000	conv	0	76	76	density	0	6.914	6.914	covered_nt	0	313	313
GANAB	hits	1.0000	12.0000	13.0000	conv	2	74	76	density	0.202	6.111	6.313	covered_nt	26	569	595
HIST1H4B	hits	0.000	2.000	2.000	conv	0	76	76	density	0	6.146	6.146	covered_nt	0	250	250
TMED1	hits	0.000	9.000	9.000	conv	0	76	76	density	0	5.555	5.555	covered_nt	0	625	625
ASNA1	hits	0.000	10.000	10.000	conv	0	76	76	density	0	5.48	5.48	covered_nt	0	559	559
GET4	hits	0.000	12.000	12.000	conv	0	76	76	density	0	5.024	5.024	covered_nt	0	659	659
MFN2	hits	0.0000	6.0000	6.0000	conv	0	76	76	density	0	4.77	4.77	covered_nt	0	389	389
UBC	hits	0.000	3.000	3.000	conv	0	76	76	density	0	3.101	3.101	covered_nt	0	196	196
MGST1	hits	0.0000	6.0000	6.0000	conv	0	75	75	density	0	13.884	13.884	covered_nt	0	375	375
C7orf50	hits	0.0000	5.0010	5.0010	conv	0	75	75	density	0	12.06	12.06	covered_nt	0	585	585
MRPL53	hits	1.000	4.000	5.000	conv	11	64	75	density	5.686	4.75	10.437	covered_nt	103	170	273
C9orf23	hits	0.0000	3.0000	3.0000	conv	0	75	75	density	0	9.04	9.04	covered_nt	0	437	437
ANXA11	hits	0.9990	6.9990	8.0010	conv	2.001	72.999	75	density	0.069	8.204	8.273	covered_nt	23.001	438	461.001
SLC25A39	hits	0.0000	7.0000	7.0000	conv	0	75	75	density	0	7.916	7.916	covered_nt	0	465	465
ETFA	hits	1.0000	4.0000	5.0000	conv	9	66	75	density	0.128	6.43	6.558	covered_nt	85	212	297
BLVRB	hits	0.000	4.000	4.000	conv	0	75	75	density	0	5.308	5.308	covered_nt	0	331	331
ACTR2	hits	0.0000	7.0000	7.0000	conv	0	75	75	density	0	5.021	5.021	covered_nt	0	369	369
DHX9	hits	0.0000	8.0000	8.0000	conv	0	75	75	density	0	4.716	4.716	covered_nt	0	380	380
CTPS	hits	0.000	8.000	8.000	conv	0	75	75	density	0	4.142	4.142	covered_nt	0	533	533
FARSB	hits	0.000	3.000	3.000	conv	0	75	75	density	0	3.975	3.975	covered_nt	0	329	329
STT3A	hits	0.000	6.000	6.000	conv	0	75	75	density	0	3.922	3.922	covered_nt	0	397	397
FAM136A	hits	0.000	6.000	6.000	conv	0	75	75	density	0	3.922	3.922	covered_nt	0	256	256
UBE2Q1	hits	0.000	8.000	8.000	conv	0	75	75	density	0	3.768	3.768	covered_nt	0	407	407
CNP	hits	0.000	9.000	9.000	conv	0	75	75	density	0	3.513	3.513	covered_nt	0	544	544
METAP2	hits	0.000	4.000	4.000	conv	0	75	75	density	0	3.328	3.328	covered_nt	0	317	317
SLC19A1	hits	0.0250	8.9750	9.0000	conv	0.259	74.741	74.999	density	0.009	9.178	9.187	covered_nt	1.582	585.419	587.001
EGLN2	hits	1.3340	7.3340	8.6660	conv	7.334	67.334	74.666	density	1.457	7.234	8.691	covered_nt	91.334	496	587.334
HDLBP	hits	0.0000	9.0000	9.0000	conv	0	74.001	74.001	density	0	5.85	5.85	covered_nt	0	542.001	542.001
FOXM1	hits	0.0000	11.0000	11.0000	conv	0	74	74	density	0	12.293	12.293	covered_nt	0	793	793
SLC29A1	hits	0.0000	8.0000	8.0000	conv	0	74	74	density	0	12.115	12.115	covered_nt	0	501	501
RELA	hits	1.0130	7.9860	8.9990	conv	6.037	67.963	74	density	1.29	10.653	11.943	covered_nt	69.43	523.571	593.001
DCTN3	hits	1.0000	5.0000	6.0000	conv	6	68	74	density	1.733	8.564	10.297	covered_nt	100	323	423
PPP1R35	hits	2.000	1.000	3.000	conv	65	9	74	density	6.867	2.854	9.721	covered_nt	294	58	352
BABAM1	hits	0.0000	8.0000	8.0000	conv	0	74	74	density	0	8.794	8.794	covered_nt	0	575	575
GCHFR	hits	0.000	6.000	6.000	conv	0	74	74	density	0	5.936	5.936	covered_nt	0	430	430
CCDC167	hits	0.000	3.000	3.000	conv	0	74	74	density	0	5.633	5.633	covered_nt	0	302	302
SCAMP2	hits	0.000	3.000	3.000	conv	0	74	74	density	0	5.07	5.07	covered_nt	0	421	421
PDLIM1	hits	0.000	4.000	4.000	conv	0	74	74	density	0	5.024	5.024	covered_nt	0	458	458
PEA15	hits	0.000	10.000	10.000	conv	0	74	74	density	0	4.548	4.548	covered_nt	0	553	553
YY1	hits	0.000	8.000	8.000	conv	0	74	74	density	0	4.263	4.263	covered_nt	0	472	472
AK1	hits	0.000	4.000	4.000	conv	0	74	74	density	0	4.058	4.058	covered_nt	0	355	355
SNX1	hits	0.0150	3.9850	4.0000	conv	0.343	73.657	74	density	0.006	3.353	3.359	covered_nt	1.552	340.448	342
SOX4	hits	0.000	6.000	6.000	conv	0	74	74	density	0	2.783	2.783	covered_nt	0	287	287
GTF2H5	hits	0.000	3.000	3.000	conv	0	74	74	density	0	2.139	2.139	covered_nt	0	255	255
SET	hits	2.0200	8.9800	11.0000	conv	5.156	68.843	73.999	density	1.319	7.878	9.195	covered_nt	59.274	330.725	389.999
PAFAH1B3	hits	0.0250	7.9760	8.0000	conv	0.055	72.946	73	density	0.048	12.279	12.327	covered_nt	1.596	497.403	499
WBSCR22	hits	1.0000	5.0000	6.0000	conv	3	70	73	density	0.613	10.217	10.829	covered_nt	60	248	308
NOP56	hits	2.0000	8.6660	10.6660	conv	4	69	73	density	1.778	6.939	8.717	covered_nt	64	423.666	487.666
CHCHD5	hits	1.000	4.000	5.000	conv	4	69	73	density	1.631	4.932	6.563	covered_nt	82	199	281
FDX1L	hits	0.000	5.000	5.000	conv	0	73	73	density	0	5.297	5.297	covered_nt	0	323	323
NOSIP	hits	0.000	4.000	4.000	conv	0	73	73	density	0	5.253	5.253	covered_nt	0	408	408
TSEN54	hits	0.000	5.000	5.000	conv	0	73	73	density	0	4.567	4.567	covered_nt	0	441	441
MARS	hits	1.000	11.000	12.000	conv	2	71	73	density	0.154	4.173	4.327	covered_nt	29	497	526
VAT1	hits	0.000	7.000	7.000	conv	0	73	73	density	0	4.246	4.246	covered_nt	0	496	496
SLC2A1	hits	0.000	8.000	8.000	conv	0	73	73	density	0	4.128	4.128	covered_nt	0	605	605
CENPB	hits	0.000	7.000	7.000	conv	0	73	73	density	0	4.022	4.022	covered_nt	0	433	433
PSMG3	hits	0.0100	3.9900	4.0000	conv	0.02	71.98	72	density	0.038	8.712	8.75	covered_nt	0.515	408.485	409
SMARCD1	hits	0.0100	11.9900	12.0000	conv	0.02	71.98	72	density	0.003	7.485	7.488	covered_nt	0.267	834.733	835
PSMD12	hits	0.0000	3.0000	3.0000	conv	0	72	72	density	0	7.245	7.245	covered_nt	0	400	400
ADAR	hits	0.0000	9.0000	9.0000	conv	0	72	72	density	0	6.707	6.707	covered_nt	0	507	507
SSBP4	hits	0.0000	5.0000	5.0000	conv	0	72	72	density	0	5.769	5.769	covered_nt	0	224	224
GATC	hits	0.0000	7.0000	7.0000	conv	0	72	72	density	0	5.582	5.582	covered_nt	0	509	509
NDUFS3	hits	0.000	4.000	4.000	conv	0	72	72	density	0	5.259	5.259	covered_nt	0	358	358
C14orf1	hits	0.000	8.000	8.000	conv	0	72	72	density	0	4.974	4.974	covered_nt	0	469	469
ATG4D	hits	0.000	8.000	8.000	conv	0	72	72	density	0	4.878	4.878	covered_nt	0	539	539
CLN6	hits	0.000	8.000	8.000	conv	0	72	72	density	0	4.787	4.787	covered_nt	0	597	597
BYSL	hits	0.000	6.000	6.000	conv	0	72	72	density	0	4.69	4.69	covered_nt	0	494	494
NAP1L1	hits	5.0000	8.0000	13.0000	conv	35	37	72	density	0.929	3.744	4.673	covered_nt	268	254	522
IGBP1	hits	0.000	7.000	7.000	conv	0	72	72	density	0	4.617	4.617	covered_nt	0	391	391
GTF2A2	hits	0.000	6.000	6.000	conv	0	72	72	density	0	4.558	4.558	covered_nt	0	357	357
USP39	hits	0.000	8.000	8.000	conv	0	72	72	density	0	4.537	4.537	covered_nt	0	491	491
BRIX1	hits	0.000	4.000	4.000	conv	0	72	72	density	0	4.349	4.349	covered_nt	0	247	247
FBXL15	hits	0.000	5.000	5.000	conv	0	72	72	density	0	4.304	4.304	covered_nt	0	443	443
NPLOC4	hits	2.000	12.000	14.000	conv	5	67	72	density	0.119	4.052	4.171	covered_nt	65	683	748
NUDT19	hits	0.000	10.000	10.000	conv	0	72	72	density	0	4.127	4.127	covered_nt	0	489	489
DRG1	hits	0.000	3.000	3.000	conv	0	72	72	density	0	4.11	4.11	covered_nt	0	236	236
DNAJA1	hits	0.000	4.000	4.000	conv	0	72	72	density	0	3.885	3.885	covered_nt	0	212	212
KIF20A	hits	0.000	7.000	7.000	conv	0	72	72	density	0	3.87	3.87	covered_nt	0	473	473
C20orf11	hits	0.000	8.000	8.000	conv	0	72	72	density	0	3.707	3.707	covered_nt	0	534	534
SAMD4B	hits	1.000	9.000	10.000	conv	12	60	72	density	0.189	3.465	3.654	covered_nt	53	451	504
CCDC117	hits	0.000	7.000	7.000	conv	0	72	72	density	0	3.578	3.578	covered_nt	0	436	436
KAT2A	hits	0.000	7.000	7.000	conv	0	72	72	density	0	3.532	3.532	covered_nt	0	329	329
ERC1	hits	14.0000	0.0000	14.0000	conv	72	0	72	density	0.185	0	0.185	covered_nt	637	0	637
MTPN	hits	0.000	6.000	6.000	conv	0	71.5	71.5	density	0	3.766	3.766	covered_nt	0	489.5	489.5
LUZP6	hits	0.000	6.000	6.000	conv	0	71.5	71.5	density	0	3.766	3.766	covered_nt	0	489.5	489.5
USP1	hits	0.0200	10.9800	11.0000	conv	0.04	70.961	71.001	density	0.006	7.972	7.977	covered_nt	0.45	576.55	577
SARNP	hits	0.0200	1.9800	2.0000	conv	1.334	69.667	71.001	density	0.008	7.885	7.893	covered_nt	3.746	242.255	246.001
HCCS	hits	0.0000	3.0000	3.0000	conv	0	71.001	71.001	density	0	6.368	6.368	covered_nt	0	231.999	231.999
BCAT1	hits	0.9990	5.0000	5.9990	conv	5.001	66	71.001	density	0.06	4.387	4.447	covered_nt	54.999	398	452.999
SLCO5A1	hits	3.0000	0.0000	3.0000	conv	71.001	0	71.001	density	0.227	0	0.227	covered_nt	255	0	255
CTSB	hits	0.0000	11.0000	11.0000	conv	0	71	71	density	0	10.96	10.96	covered_nt	0	691	691
DAP3	hits	0.0000	5.0000	5.0000	conv	0	71	71	density	0	10.786	10.786	covered_nt	0	353	353
WTAP	hits	0.0200	6.9800	7.0000	conv	0.174	70.826	71	density	0.004	8.789	8.794	covered_nt	0.836	408.164	409
TIMM8B	hits	0.0200	5.9800	6.0000	conv	0.119	70.881	71	density	0.144	8.384	8.528	covered_nt	1.238	354.762	356
BRI3	hits	1.0300	3.9700	5.0000	conv	3.584	67.416	71	density	0.397	7.697	8.094	covered_nt	29	279	308
NCOA4	hits	0.0000	6.0000	6.0000	conv	0	71	71	density	0	7.352	7.352	covered_nt	0	319	319
RPS12	hits	1.000	2.000	3.000	conv	19	52	71	density	1.625	4.252	5.877	covered_nt	52	91	143
C16orf61	hits	1.000	3.000	4.000	conv	3	68	71	density	0.155	5.485	5.639	covered_nt	34	320	354
ZNF593	hits	0.000	2.000	2.000	conv	0	71	71	density	0	5.573	5.573	covered_nt	0	303	303
MRPL18	hits	0.000	6.000	6.000	conv	0	71	71	density	0	5.413	5.413	covered_nt	0	407	407
BCAS2	hits	0.000	7.000	7.000	conv	0	71	71	density	0	5.079	5.079	covered_nt	0	427	427
TIMM44	hits	0.000	10.000	10.000	conv	0	71	71	density	0	4.949	4.949	covered_nt	0	598	598
ZNF358	hits	0.000	9.000	9.000	conv	0	71	71	density	0	4.73	4.73	covered_nt	0	499	499
SAMM50	hits	0.000	7.000	7.000	conv	0	71	71	density	0	4.532	4.532	covered_nt	0	389	389
SRP68	hits	1.000	5.000	6.000	conv	4	67	71	density	0.212	4.281	4.493	covered_nt	49	464	513
RNF220	hits	0.000	8.000	8.000	conv	0	71	71	density	0	4.283	4.283	covered_nt	0	556	556
TOMM20	hits	0.000	13.000	13.000	conv	0	71	71	density	0	3.901	3.901	covered_nt	0	472	472
PARP1	hits	0.000	9.000	9.000	conv	0	71	71	density	0	3.705	3.705	covered_nt	0	480	480
VMA21	hits	0.000	10.000	10.000	conv	0	71	71	density	0	3.683	3.683	covered_nt	0	561	561
FDPS	hits	1.0000	6.0000	7.0000	conv	3	67	70	density	0.402	12.582	12.982	covered_nt	30	325	355
C16orf5	hits	0.0000	7.0000	7.0000	conv	0	70	70	density	0	10.026	10.026	covered_nt	0	498	498
PSMG2	hits	0.0100	5.9900	6.0000	conv	0.02	69.98	70	density	0.001	7.976	7.977	covered_nt	0.257	313.743	314
KDELR2	hits	0.0200	10.9800	11.0000	conv	0.119	69.881	70	density	0.007	7.45	7.457	covered_nt	1	675	676
POLDIP3	hits	0.0000	10.0000	10.0000	conv	0	70	70	density	0	6.886	6.886	covered_nt	0	670	670
ATN1	hits	0.0000	11.0000	11.0000	conv	0	70	70	density	0	6.432	6.432	covered_nt	0	721	721
CBX3	hits	0.0000	6.0000	6.0000	conv	0	70	70	density	0	6.016	6.016	covered_nt	0	312	312
SPAG7	hits	1.000	4.000	5.000	conv	4	66	70	density	0.508	4.928	5.435	covered_nt	32	302	334
FAM32A	hits	0.000	9.000	9.000	conv	0	70	70	density	0	5.308	5.308	covered_nt	0	560	560
DLGAP5	hits	0.0000	3.0000	3.0000	conv	0	70	70	density	0	5.256	5.256	covered_nt	0	315	315
ELOVL1	hits	0.000	7.000	7.000	conv	0	70	70	density	0	5.142	5.142	covered_nt	0	509	509
CNPPD1	hits	0.000	5.000	5.000	conv	0	70	70	density	0	4.914	4.914	covered_nt	0	605	605
PMVK	hits	0.000	6.000	6.000	conv	0	70	70	density	0	4.787	4.787	covered_nt	0	346	346
ARPC1B	hits	0.000	2.000	2.000	conv	0	70	70	density	0	4.377	4.377	covered_nt	0	303	303
TRIM11	hits	0.000	7.000	7.000	conv	0	70	70	density	0	4.203	4.203	covered_nt	0	469	469
MED19	hits	0.000	1.000	1.000	conv	0	70	70	density	0	4.188	4.188	covered_nt	0	261	261
SHKBP1	hits	0.000	6.000	6.000	conv	0	70	70	density	0	4.078	4.078	covered_nt	0	376	376
TSN	hits	0.000	6.000	6.000	conv	0	70	70	density	0	4.033	4.033	covered_nt	0	524	524
TADA3	hits	0.0000	4.0000	4.0000	conv	0	70	70	density	0	3.823	3.823	covered_nt	0	294	294
ITGAE	hits	1.000	4.000	5.000	conv	9	61	70	density	0.125	3.174	3.299	covered_nt	75	310	385
PNPO	hits	0.000	7.000	7.000	conv	0	70	70	density	0	3.263	3.263	covered_nt	0	298	298
RSL1D1	hits	0.000	6.000	6.000	conv	0	70	70	density	0	2.885	2.885	covered_nt	0	328	328
CTNNBL1	hits	0.000	1.000	1.000	conv	0	70	70	density	0	2.857	2.857	covered_nt	0	118	118
TOMM40	hits	0.0000	8.0010	8.0010	conv	0	69.999	69.999	density	0	9.296	9.296	covered_nt	0	395.001	395.001
SSSCA1	hits	1.000	4.000	5.000	conv	3	66	69	density	3.3	5.631	8.931	covered_nt	57	318	375
VPS28	hits	0.0100	3.9900	4.0000	conv	0.287	68.713	69	density	0.052	8.144	8.196	covered_nt	1.455	347.545	349
RAB24	hits	0.0000	7.0000	7.0000	conv	0	69	69	density	0	7.647	7.647	covered_nt	0	413	413
NCDN	hits	0.0000	6.9990	6.9990	conv	0	69	69	density	0	6.91	6.91	covered_nt	0	413.001	413.001
DBN1	hits	0.0000	6.0000	6.0000	conv	0	69	69	density	0	6.318	6.318	covered_nt	0	476	476
HGS	hits	2.000	5.000	7.000	conv	8	61	69	density	1.041	4.203	5.245	covered_nt	161	518	679
CDK2AP2	hits	0.000	5.000	5.000	conv	0	69	69	density	0	5.096	5.096	covered_nt	0	458	458
ICT1	hits	0.000	3.000	3.000	conv	0	69	69	density	0	5.046	5.046	covered_nt	0	282	282
MTG1	hits	0.000	5.000	5.000	conv	0	69	69	density	0	4.781	4.781	covered_nt	0	428	428
PYCR2	hits	0.000	7.000	7.000	conv	0	69	69	density	0	4.686	4.686	covered_nt	0	419	419
SLBP	hits	1.000	5.000	6.000	conv	6	63	69	density	0.383	4.177	4.56	covered_nt	54	295	349
BTBD2	hits	0.000	10.000	10.000	conv	0	69	69	density	0	4.457	4.457	covered_nt	0	549	549
TUBB6	hits	0.000	5.000	5.000	conv	0	69	69	density	0	4.286	4.286	covered_nt	0	336	336
ID2	hits	0.000	7.000	7.000	conv	0	69	69	density	0	4.255	4.255	covered_nt	0	247	247
TSG101	hits	0.000	5.000	5.000	conv	0	69	69	density	0	4.249	4.249	covered_nt	0	279	279
CEBPB	hits	0.000	8.000	8.000	conv	0	69	69	density	0	4.213	4.213	covered_nt	0	370	370
MAP7D1	hits	0.000	7.000	7.000	conv	0	69	69	density	0	3.976	3.976	covered_nt	0	490	490
SND1	hits	0.000	8.000	8.000	conv	0	69	69	density	0	3.798	3.798	covered_nt	0	453	453
NDUFA4	hits	0.000	4.000	4.000	conv	0	69	69	density	0	3.784	3.784	covered_nt	0	263	263
LMNB2	hits	0.000	11.000	11.000	conv	0	69	69	density	0	3.653	3.653	covered_nt	0	537	537
DDX1	hits	0.000	3.000	3.000	conv	0	69	69	density	0	3.573	3.573	covered_nt	0	295	295
CYCS	hits	0.000	6.000	6.000	conv	0	69	69	density	0	2.434	2.434	covered_nt	0	244	244
HOXA10	hits	0.0000	11.9460	11.9460	conv	0	68.666	68.666	density	0	7.465	7.465	covered_nt	0	586.848	586.848
SLC37A4	hits	0.0000	7.0000	7.0000	conv	0	68	68	density	0	12.188	12.188	covered_nt	0	490	490
PRNP	hits	0.0000	7.0000	7.0000	conv	0	68	68	density	0	10.848	10.848	covered_nt	0	474	474
HNRNPR	hits	0.0000	8.0000	8.0000	conv	0	68	68	density	0	8.009	8.009	covered_nt	0	319	319
RPS27A	hits	0.0400	3.9610	3.9990	conv	0.432	67.568	68	density	0.101	7.882	7.983	covered_nt	1.882	185.117	187.001
AUP1	hits	1.000	6.000	7.000	conv	7	61	68	density	2.796	4.651	7.447	covered_nt	95	387	482
UBL7	hits	0.0000	5.0000	5.0000	conv	0	68	68	density	0	7.367	7.367	covered_nt	0	330	330
SERPINH1	hits	0.0000	6.0000	6.0000	conv	0	68	68	density	0	6.595	6.595	covered_nt	0	406	406
UBE2T	hits	3.000	4.000	7.000	conv	11	57	68	density	1.462	5.111	6.573	covered_nt	165	305	470
UBR7	hits	0.0000	9.0000	9.0000	conv	0	68	68	density	0	5.991	5.991	covered_nt	0	506	506
C19orf70	hits	0.000	4.000	4.000	conv	0	68	68	density	0	5.043	5.043	covered_nt	0	288	288
TMEM173	hits	0.000	11.000	11.000	conv	0	68	68	density	0	4.773	4.773	covered_nt	0	573	573
PSMD2	hits	0.000	8.000	8.000	conv	0	68	68	density	0	3.698	3.698	covered_nt	0	350	350
NCAPD2	hits	0.000	7.000	7.000	conv	0	68	68	density	0	3.208	3.208	covered_nt	0	396	396
SCP2	hits	0.0020	6.0000	6.0020	conv	0.003	67.995	67.998	density	0	14.579	14.579	covered_nt	0.04	449.957	449.997
LOC100507246	hits	0.0000	11.0000	11.0000	conv	0	67	67	density	0	10.058	10.058	covered_nt	0	469	469
SORBS3	hits	0.0000	10.0000	10.0000	conv	0	67	67	density	0	7.551	7.551	covered_nt	0	640	640
RPL10	hits	3.0000	1.0000	4.0000	conv	31	36	67	density	5.378	2.041	7.419	covered_nt	204	46	250
PTPMT1	hits	1.0200	5.9800	7.0000	conv	3.129	63.871	67	density	0.725	6.038	6.762	covered_nt	31.079	371.921	403
SNRNP25	hits	0.000	5.000	5.000	conv	0	67	67	density	0	5.479	5.479	covered_nt	0	474	474
DHX30	hits	2.0000	6.0000	8.0000	conv	12	55	67	density	0.325	5	5.324	covered_nt	103	382	485
KPNB1	hits	1.000	17.000	18.000	conv	3	64	67	density	0.217	4.069	4.286	covered_nt	48	663	711
FAM98C	hits	0.000	1.000	1.000	conv	0	67	67	density	0	4.073	4.073	covered_nt	0	202	202
NAA50	hits	0.000	13.000	13.000	conv	0	67	67	density	0	3.191	3.191	covered_nt	0	499	499
ARPC3	hits	0.000	1.000	1.000	conv	0	67	67	density	0	2.96	2.96	covered_nt	0	60	60
CHTF8	hits	0.0000	11.0010	11.0010	conv	0	66.999	66.999	density	0	8.434	8.434	covered_nt	0	522.999	522.999
ZNF146	hits	0.0000	6.9990	6.9990	conv	0	66.999	66.999	density	0	6.335	6.335	covered_nt	0	378	378
TEX264	hits	0.0020	7.0000	7.0020	conv	0.01	65.992	66.002	density	0	15.937	15.937	covered_nt	0.074	415.927	416.001
USMG5	hits	0.0400	3.9610	3.9990	conv	0.216	65.784	66	density	0.038	9.62	9.658	covered_nt	1.862	176.138	178
CSDA	hits	3.0100	6.9900	10.0000	conv	15.03	50.97	66	density	0.84	6.833	7.671	covered_nt	151.287	362.713	514
CCNDBP1	hits	0.9990	6.9990	8.0010	conv	9	57	66	density	0.627	6.127	6.752	covered_nt	39	333	372
RPS9	hits	1.000	4.000	5.000	conv	15	51	66	density	1.931	4.487	6.418	covered_nt	171	153	324
EBNA1BP2	hits	0.0000	1.0000	1.0000	conv	0	66	66	density	0	5.721	5.721	covered_nt	0	181	181
SFT2D1	hits	3.000	5.000	8.000	conv	21	45	66	density	0.55	5.128	5.677	covered_nt	101	235	336
UBAP2L	hits	0.0200	7.9800	8.0000	conv	0.426	65.574	66	density	0.008	5.629	5.637	covered_nt	2.436	461.564	464
C3orf75	hits	0.000	8.000	8.000	conv	0	66	66	density	0	5.266	5.266	covered_nt	0	506	506
YIF1A	hits	0.000	6.000	6.000	conv	0	66	66	density	0	4.901	4.901	covered_nt	0	324	324
MZT1	hits	1.000	7.000	8.000	conv	12	54	66	density	0.338	4.069	4.408	covered_nt	45	381	426
TEX261	hits	0.000	11.000	11.000	conv	0	66	66	density	0	4.039	4.039	covered_nt	0	520	520
KIAA0664	hits	0.000	15.000	15.000	conv	0	66	66	density	0	3.919	3.919	covered_nt	0	738	738
TUBB2A	hits	0.000	1.000	1.000	conv	0	66	66	density	0	3.765	3.765	covered_nt	0	204	204
SSB	hits	0.000	5.000	5.000	conv	0	66	66	density	0	3.58	3.58	covered_nt	0	187	187
NOL12	hits	0.000	3.000	3.000	conv	0	66	66	density	0	2.61	2.61	covered_nt	0	145	145
HRAS	hits	1.0040	7.9950	9.0000	conv	8.055	56.945	65.001	density	2.948	11.529	14.48	covered_nt	63.433	461.568	525.001
ITGB3BP	hits	2.0010	3.0000	5.0010	conv	9.999	54.999	65.001	density	0.09	8.782	8.871	covered_nt	51	210.999	261.999
SH3GL1	hits	0.0000	6.9990	6.9990	conv	0	65.001	65.001	density	0	8.744	8.744	covered_nt	0	465.999	465.999
CCND3	hits	0.0000	8.0000	8.0000	conv	0	65	65	density	0	10.792	10.792	covered_nt	0	427	427
RBM39	hits	8.0260	4.9730	12.9990	conv	31.218	33.779	65	density	1.424	7.9	9.324	covered_nt	380.051	243.951	624.002
WLS	hits	1.0440	12.9560	14.0000	conv	3.264	61.736	65	density	0.041	9.22	9.261	covered_nt	32.313	589.686	621.999
ATP5L	hits	0.0000	6.0000	6.0000	conv	0	65	65	density	0	6.811	6.811	covered_nt	0	262	262
RFC2	hits	0.0000	2.0000	2.0000	conv	0	65	65	density	0	6.35	6.35	covered_nt	0	264	264
HMGN2	hits	3.000	3.000	6.000	conv	19	46	65	density	2.939	2.554	5.493	covered_nt	151	96	247
NPC2	hits	1.000	2.500	3.500	conv	21	44	65	density	0.632	4.502	5.134	covered_nt	69	194.5	263.5
GTF2E2	hits	0.000	4.000	4.000	conv	0	65	65	density	0	4.794	4.794	covered_nt	0	411	411
MRPL16	hits	0.000	6.000	6.000	conv	0	65	65	density	0	4.784	4.784	covered_nt	0	314	314
SLC35B2	hits	0.000	9.500	9.500	conv	0	65	65	density	0	4.769	4.769	covered_nt	0	536	536
C1orf85	hits	0.000	6.000	6.000	conv	0	65	65	density	0	4.67	4.67	covered_nt	0	388	388
RG9MTD1	hits	0.000	8.000	8.000	conv	0	65	65	density	0	4.668	4.668	covered_nt	0	394	394
TACO1	hits	0.000	4.000	4.000	conv	0	65	65	density	0	4.637	4.637	covered_nt	0	351	351
ANXA5	hits	0.000	5.000	5.000	conv	0	65	65	density	0	4.397	4.397	covered_nt	0	321	321
GLT25D1	hits	0.000	10.000	10.000	conv	0	65	65	density	0	4.207	4.207	covered_nt	0	628	628
CIAO1	hits	0.000	8.000	8.000	conv	0	65	65	density	0	3.976	3.976	covered_nt	0	595	595
CS	hits	1.000	8.000	9.000	conv	2	63	65	density	0.154	3.615	3.769	covered_nt	29	335	364
LTV1	hits	0.000	4.000	4.000	conv	0	65	65	density	0	3.652	3.652	covered_nt	0	210	210
KLHL15	hits	1.000	12.000	13.000	conv	3	62	65	density	0.144	3.365	3.509	covered_nt	39	584	623
LSR	hits	0.0100	7.9900	8.0000	conv	0.02	64.979	64.999	density	0.004	9.388	9.392	covered_nt	0.468	513.532	514
ECHDC1	hits	0.0000	9.0000	9.0000	conv	0	64	64	density	0	11.387	11.387	covered_nt	0	420	420
MPST	hits	0.0000	4.0000	4.0000	conv	0	64	64	density	0	10.751	10.751	covered_nt	0	321	321
PDHB	hits	0.0050	8.9950	9.0000	conv	0.015	63.985	64	density	0.005	10.549	10.554	covered_nt	0.179	480.821	481
NFKBIB	hits	0.0680	6.9320	7.0000	conv	0.736	63.263	64	density	0.082	10.22	10.303	covered_nt	4.65	506.35	511
SLC4A2	hits	0.0000	8.0000	8.0000	conv	0	64	64	density	0	8.175	8.175	covered_nt	0	541	541
TMEM11	hits	0.0000	8.0000	8.0000	conv	0	64	64	density	0	7.93	7.93	covered_nt	0	449	449
NDUFA3	hits	2.000	3.000	5.000	conv	12	52	64	density	2.179	5.746	7.925	covered_nt	133	187	320
WIBG	hits	1.0000	5.0000	6.0000	conv	2	62	64	density	0.322	7.408	7.73	covered_nt	59	278	337
GNAI2	hits	1.0000	8.0000	9.0000	conv	11	53	64	density	0.733	6.168	6.902	covered_nt	81	325	406
DDX49	hits	0.0000	6.0000	6.0000	conv	0	64	64	density	0	6.902	6.902	covered_nt	0	358	358
ARMC6	hits	0.0000	6.0000	6.0000	conv	0	64	64	density	0	6.708	6.708	covered_nt	0	449	449
ADK	hits	2.0000	5.0000	7.0000	conv	23	41	64	density	0.038	6.655	6.693	covered_nt	139	182	321
AMD1	hits	0.0100	11.9900	12.0000	conv	0.03	63.97	64	density	0.002	6.135	6.137	covered_nt	0.248	481.752	482
UBE2K	hits	0.0100	6.9900	7.0000	conv	0.04	63.96	64	density	0	6.083	6.083	covered_nt	0.268	475.731	475.999
GAR1	hits	0.0000	4.0000	4.0000	conv	0	64	64	density	0	6.028	6.028	covered_nt	0	160	160
C6orf115	hits	0.000	6.000	6.000	conv	0	64	64	density	0	5.51	5.51	covered_nt	0	377	377
SHISA5	hits	1.000	8.000	9.000	conv	4	60	64	density	0.216	4.617	4.833	covered_nt	49	510	559
NUDC	hits	1.000	4.000	5.000	conv	3	61	64	density	0.223	4.298	4.521	covered_nt	39	248	287
C8orf33	hits	0.000	10.000	10.000	conv	0	64	64	density	0	4.502	4.502	covered_nt	0	567	567
CISD1	hits	0.000	5.000	5.000	conv	0	64	64	density	0	4.46	4.46	covered_nt	0	436	436
FTL	hits	0.000	2.000	2.000	conv	0	64	64	density	0	4.24	4.24	covered_nt	0	156	156
CCNK	hits	1.000	8.000	9.000	conv	2	62	64	density	0.159	4.064	4.223	covered_nt	32	410	442
MED29	hits	0.000	10.000	10.000	conv	0	64	64	density	0	4.109	4.109	covered_nt	0	580	580
EEF1G	hits	1.000	4.000	5.000	conv	3	61	64	density	0.294	3.59	3.884	covered_nt	29	170	199
DVL2	hits	0.000	5.000	5.000	conv	0	64	64	density	0	3.722	3.722	covered_nt	0	368	368
CHCHD3	hits	8.000	5.000	13.000	conv	51	13	64	density	0.135	3.475	3.61	covered_nt	289	161	450
PAFAH1B2	hits	0.2910	9.7090	10.0000	conv	1.863	62.136	63.999	density	0.063	3.558	3.621	covered_nt	13.515	450.485	464
RPS10-NUDT3	hits	3.510	5.500	9.010	conv	17.058	46.5	63.558	density	0.156	3.638	3.794	covered_nt	155.947	289.5	445.447
NUDT3	hits	3.500	5.500	9.000	conv	17	46.5	63.5	density	0.203	3.71	3.913	covered_nt	155.5	289.5	445
UQCRB	hits	2.0000	6.0000	8.0000	conv	10	53	63	density	3.268	4.962	8.229	covered_nt	122	270	392
TRMT112	hits	0.000	3.000	3.000	conv	0	63	63	density	0	5.608	5.608	covered_nt	0	278	278
PTRHD1	hits	0.000	3.000	3.000	conv	0	63	63	density	0	5.578	5.578	covered_nt	0	268	268
C12orf73	hits	1.000	8.000	9.000	conv	5	58	63	density	1.089	4.409	5.498	covered_nt	60	343	403
TMEM160	hits	0.000	3.000	3.000	conv	0	63	63	density	0	5.398	5.398	covered_nt	0	270	270
WASF2	hits	0.0000	14.0000	14.0000	conv	0	63	63	density	0	5.306	5.306	covered_nt	0	572	572
SDR39U1	hits	0.000	10.000	10.000	conv	0	63	63	density	0	5.22	5.22	covered_nt	0	447	447
G3BP1	hits	0.0000	3.0000	3.0000	conv	0	63	63	density	0	5.203	5.203	covered_nt	0	286	286
RABEP1	hits	3.0000	7.0000	10.0000	conv	21	42	63	density	0.128	4.691	4.819	covered_nt	89	437	526
NUDT5	hits	0.000	4.000	4.000	conv	0	63	63	density	0	4.638	4.638	covered_nt	0	288	288
TRA2A	hits	0.000	9.000	9.000	conv	0	63	63	density	0	4.574	4.574	covered_nt	0	420	420
LRRC41	hits	1.000	6.000	7.000	conv	3	60	63	density	0.213	4.155	4.368	covered_nt	35	496	531
MED4	hits	0.000	8.000	8.000	conv	0	63	63	density	0	4.342	4.342	covered_nt	0	390	390
SON	hits	2.0100	9.9900	12.0000	conv	11.02	51.98	63	density	0.581	3.662	4.242	covered_nt	66.347	444.653	511
KIF2C	hits	0.000	3.000	3.000	conv	0	63	63	density	0	4.099	4.099	covered_nt	0	465	465
EIF2S3	hits	0.000	7.000	7.000	conv	0	63	63	density	0	3.624	3.624	covered_nt	0	393	393
C22orf13	hits	0.000	8.000	8.000	conv	0	63	63	density	0	3.596	3.596	covered_nt	0	400	400
MRPL49	hits	0.0050	6.9960	7.0010	conv	0.01	62.989	62.999	density	0.006	8.941	8.947	covered_nt	0.124	422.875	422.999
YME1L1	hits	0.9990	6.9990	8.0010	conv	3	59.001	62.001	density	0.204	5.786	5.991	covered_nt	57.999	357.999	416.001
ALKBH6	hits	3.0000	5.0000	8.0000	conv	10	52	62	density	2.846	8.81	11.657	covered_nt	140	387	527
SEC23B	hits	0.0000	6.0000	6.0000	conv	0	62	62	density	0	10.201	10.201	covered_nt	0	518	518
RPLP0	hits	3.0100	4.9900	8.0000	conv	12.02	49.98	62	density	2.426	6.909	9.335	covered_nt	86.436	249.564	336
RPS20	hits	2.0100	2.9900	5.0000	conv	4.356	57.644	62	density	3.116	5.988	9.105	covered_nt	76.366	132.634	209
PPT1	hits	0.0000	10.0000	10.0000	conv	0	62	62	density	0	7.286	7.286	covered_nt	0	539	539
NLE1	hits	1.0000	7.0000	8.0000	conv	11	51	62	density	1.237	6.015	7.252	covered_nt	89	372	461
DPH2	hits	0.0200	7.9800	8.0000	conv	0.059	61.941	62	density	0.062	7.164	7.226	covered_nt	0.693	472.307	473
RPL37	hits	2.000	4.000	6.000	conv	24	38	62	density	2.847	3.563	6.41	covered_nt	148	170	318
CNPY3	hits	4.000	4.000	8.000	conv	11	51	62	density	1.384	4.43	5.814	covered_nt	135	363	498
CADM1	hits	0.0000	8.0000	8.0000	conv	0	62	62	density	0	5.61	5.61	covered_nt	0	511	511
TIAL1	hits	0.0000	7.0000	7.0000	conv	0	62	62	density	0	5.604	5.604	covered_nt	0	468	468
HIST1H1E	hits	0.000	5.000	5.000	conv	0	62	62	density	0	5.545	5.545	covered_nt	0	359	359
AP1S1	hits	0.000	6.000	6.000	conv	0	62	62	density	0	5.247	5.247	covered_nt	0	480	480
TMEM199	hits	0.000	7.000	7.000	conv	0	62	62	density	0	5.005	5.005	covered_nt	0	451	451
DYNLL2	hits	0.000	7.000	7.000	conv	0	62	62	density	0	4.727	4.727	covered_nt	0	388	388
NOP2	hits	0.0000	3.0000	3.0000	conv	0	62	62	density	0	4.711	4.711	covered_nt	0	222	222
MRFAP1L1	hits	0.000	7.000	7.000	conv	0	62	62	density	0	4.565	4.565	covered_nt	0	361	361
CDC23	hits	3.000	7.000	10.000	conv	10	52	62	density	0.612	3.77	4.382	covered_nt	119	399	518
IFRD2	hits	0.000	6.000	6.000	conv	0	62	62	density	0	4.245	4.245	covered_nt	0	379	379
FAM53C	hits	0.0000	8.0000	8.0000	conv	0	62	62	density	0	4.194	4.194	covered_nt	0	289	289
YARS2	hits	0.000	5.000	5.000	conv	0	62	62	density	0	4.157	4.157	covered_nt	0	366	366
C11orf83	hits	0.000	5.000	5.000	conv	0	62	62	density	0	4.151	4.151	covered_nt	0	327	327
C12orf24	hits	0.000	3.000	3.000	conv	0	62	62	density	0	4.123	4.123	covered_nt	0	250	250
HDDC2	hits	0.000	3.000	3.000	conv	0	62	62	density	0	4.063	4.063	covered_nt	0	254	254
CTNNA1	hits	0.000	12.000	12.000	conv	0	62	62	density	0	3.871	3.871	covered_nt	0	513	513
PGRMC2	hits	0.000	7.000	7.000	conv	0	62	62	density	0	3.692	3.692	covered_nt	0	452	452
VAPA	hits	0.0000	5.0000	5.0000	conv	0	62	62	density	0	3.594	3.594	covered_nt	0	343	343
XRN2	hits	0.000	5.000	5.000	conv	0	62	62	density	0	3.568	3.568	covered_nt	0	373	373
SRSF4	hits	0.000	5.000	5.000	conv	0	62	62	density	0	3.53	3.53	covered_nt	0	267	267
NDFIP1	hits	0.000	5.000	5.000	conv	0	62	62	density	0	3.434	3.434	covered_nt	0	353	353
TUBA1A	hits	0.000	2.000	2.000	conv	0	62	62	density	0	3.296	3.296	covered_nt	0	147	147
JUN	hits	0.000	7.000	7.000	conv	0	62	62	density	0	3.208	3.208	covered_nt	0	274	274
ARL3	hits	0.000	5.000	5.000	conv	0	62	62	density	0	2.862	2.862	covered_nt	0	243	243
HCFC1	hits	0.000	6.000	6.000	conv	0	62	62	density	0	2.135	2.135	covered_nt	0	286	286
MRPL52	hits	1.0020	4.0020	4.9980	conv	4.998	57	61.998	density	2.301	14.989	17.288	covered_nt	73.002	322.002	394.998
DPH1	hits	0.000	5.500	5.500	conv	0	61.5	61.5	density	0	4.29	4.29	covered_nt	0	407.5	407.5
NDUFB5	hits	0.0050	7.9950	8.0000	conv	0.01	60.991	61.001	density	0.001	11.713	11.714	covered_nt	0.095	406.905	407
RBMX	hits	0.0130	8.9870	9.0000	conv	0.13	60.871	61.001	density	0.007	8.909	8.916	covered_nt	0.432	342.567	342.999
SCO2	hits	0.0000	4.0000	4.0000	conv	0	61	61	density	0	11.863	11.863	covered_nt	0	277	277
MED8	hits	0.0100	8.9900	9.0000	conv	0.119	60.881	61	density	0.038	9	9.038	covered_nt	1.168	601.832	603
RPL14	hits	0.0100	3.9900	4.0000	conv	0.02	60.98	61	density	0.011	7.536	7.547	covered_nt	0.337	223.663	224
SYPL1	hits	0.0000	9.0000	9.0000	conv	0	61	61	density	0	7.236	7.236	covered_nt	0	484	484
STRN4	hits	0.0000	8.0000	8.0000	conv	0	61	61	density	0	6.452	6.452	covered_nt	0	535	535
TAF15	hits	0.0000	4.0000	4.0000	conv	0	61	61	density	0	6.179	6.179	covered_nt	0	323	323
IMP4	hits	1.000	4.000	5.000	conv	2	59	61	density	1.089	4.985	6.074	covered_nt	30	322	352
SEPW1	hits	1.000	5.000	6.000	conv	2	59	61	density	0.601	4.942	5.543	covered_nt	27	262	289
DPY30	hits	0.000	2.000	2.000	conv	0	61	61	density	0	5.237	5.237	covered_nt	0	294	294
POLR1C	hits	0.000	9.000	9.000	conv	0	61	61	density	0	4.82	4.82	covered_nt	0	360	360
NXPH4	hits	0.000	6.000	6.000	conv	0	61	61	density	0	4.646	4.646	covered_nt	0	434	434
PIM2	hits	0.000	12.000	12.000	conv	0	61	61	density	0	4.517	4.517	covered_nt	0	479	479
CNOT3	hits	3.000	5.000	8.000	conv	21	40	61	density	1.144	3.362	4.506	covered_nt	183	268	451
CMAS	hits	0.000	4.000	4.000	conv	0	61	61	density	0	4.169	4.169	covered_nt	0	296	296
MYH9	hits	0.000	9.000	9.000	conv	0	61	61	density	0	2.892	2.892	covered_nt	0	482	482
CHAF1A	hits	0.000	3.000	3.000	conv	0	61	61	density	0	2.797	2.797	covered_nt	0	199	199
TARBP2	hits	0.0000	8.0010	8.0010	conv	0	60.999	60.999	density	0	9.502	9.502	covered_nt	0	374.001	374.001
RNF7	hits	0.0210	4.9790	5.0000	conv	0.1	60.901	60.999	density	0.013	7.779	7.791	covered_nt	0.59	205.411	206.001
C15orf63	hits	1.3340	0.6660	2.0000	conv	8.666	52	60.666	density	4.514	4.82	9.335	covered_nt	64	112.666	176.666
IRF3	hits	0.0060	3.9930	3.9990	conv	0.015	59.985	60	density	0.006	16.974	16.979	covered_nt	0.18	331.821	332.001
DHPS	hits	0.0130	7.9870	8.0010	conv	0.063	59.938	60	density	0.015	12.041	12.055	covered_nt	0.506	356.494	357
DUT	hits	0.0000	5.0010	5.0010	conv	0	60	60	density	0	9.299	9.299	covered_nt	0	441.999	441.999
C12orf44	hits	1.0000	4.0000	5.0000	conv	2	58	60	density	0.666	7.764	8.43	covered_nt	32	371	403
BLOC1S2	hits	2.0000	5.0000	7.0000	conv	7	53	60	density	0.846	6.823	7.668	covered_nt	72	384	456
PIGC	hits	0.0000	7.0000	7.0000	conv	0	60	60	density	0	7.405	7.405	covered_nt	0	358	358
TRMT2A	hits	0.0000	13.0000	13.0000	conv	0	60	60	density	0	7.23	7.23	covered_nt	0	640	640
FAM195A	hits	1.000	5.000	6.000	conv	7	53	60	density	1.431	5.21	6.641	covered_nt	97	328	425
CSK	hits	0.0000	7.0000	7.0000	conv	0	60	60	density	0	6.475	6.475	covered_nt	0	416	416
ZRANB2	hits	2.0200	8.9800	11.0000	conv	13.059	46.941	60	density	0.86	5.37	6.231	covered_nt	103.545	341.455	445
C6orf125	hits	1.000	4.000	5.000	conv	9	51	60	density	0.295	5.868	6.163	covered_nt	31	291	322
ZNF330	hits	2.000	6.000	8.000	conv	7	53	60	density	0.62	4.431	5.051	covered_nt	64	389	453
NDUFAF4	hits	1.000	6.000	7.000	conv	3	57	60	density	0.556	3.892	4.448	covered_nt	29	334	363
TPRN	hits	0.000	6.000	6.000	conv	0	60	60	density	0	4.415	4.415	covered_nt	0	535	535
NUTF2	hits	0.000	4.000	4.000	conv	0	60	60	density	0	4.242	4.242	covered_nt	0	159	159
ZFAND3	hits	0.000	10.000	10.000	conv	0	60	60	density	0	4.061	4.061	covered_nt	0	523	523
VPS35	hits	0.000	7.000	7.000	conv	0	60	60	density	0	3.916	3.916	covered_nt	0	463	463
PPP3R1	hits	0.000	7.000	7.000	conv	0	60	60	density	0	3.742	3.742	covered_nt	0	373	373
SLC25A4	hits	0.000	6.000	6.000	conv	0	60	60	density	0	3.537	3.537	covered_nt	0	469	469
LOC100506548	hits	0.000	8.000	8.000	conv	0	60	60	density	0	3.382	3.382	covered_nt	0	366	366
PRPF6	hits	0.000	4.000	4.000	conv	0	60	60	density	0	3.307	3.307	covered_nt	0	276	276
IRAK1	hits	0.0100	9.9900	10.0000	conv	0.03	59.971	59.999	density	0.014	7.864	7.879	covered_nt	0.587	537.413	538
UCK2	hits	0.000	11.500	11.500	conv	0	59.5	59.5	density	0	3.497	3.497	covered_nt	0	506.5	506.5
PSRC1	hits	0.0000	5.0010	5.0010	conv	0	59.001	59.001	density	0	9.529	9.529	covered_nt	0	411.999	411.999
TNPO2	hits	0.0000	8.0010	8.0010	conv	0	59.001	59.001	density	0	6.482	6.482	covered_nt	0	519	519
BLCAP	hits	0.0000	9.0000	9.0000	conv	0	59	59	density	0	13.345	13.345	covered_nt	0	561	561
C8orf59	hits	0.0000	4.0000	4.0000	conv	0	59	59	density	0	10.347	10.347	covered_nt	0	198	198
LINC00493	hits	2.000	3.000	5.000	conv	5	54	59	density	2.751	6.025	8.775	covered_nt	94	316	410
EI24	hits	0.0200	11.9800	12.0000	conv	0.05	58.95	59	density	0.006	7.364	7.37	covered_nt	0.515	524.485	525
C21orf59	hits	1.0000	1.0000	2.0000	conv	6	53	59	density	0.672	6.118	6.789	covered_nt	50	204	254
DSTN	hits	0.0000	7.0000	7.0000	conv	0	59	59	density	0	6.658	6.658	covered_nt	0	304	304
M6PR	hits	0.0200	7.9800	8.0000	conv	0.099	58.901	59	density	0.014	6.588	6.602	covered_nt	0.693	434.307	435
CACYBP	hits	0.0100	7.9900	8.0000	conv	0.05	58.95	59	density	0.011	6.313	6.324	covered_nt	0.743	472.257	473
RAB35	hits	0.0100	7.9900	8.0000	conv	0.02	58.98	59	density	0.002	6.22	6.222	covered_nt	0.257	440.743	441
MKRN1	hits	0.0100	4.9900	5.0000	conv	0.356	58.644	59	density	0.009	5.788	5.797	covered_nt	1.545	295.455	297
UFC1	hits	1.000	7.000	8.000	conv	4	55	59	density	0.869	4.75	5.619	covered_nt	33	291	324
CDKN2AIPNL	hits	2.000	7.000	9.000	conv	7	52	59	density	0.734	4.572	5.306	covered_nt	57	286	343
UBQLN1	hits	0.0000	10.0000	10.0000	conv	0	59	59	density	0	5.166	5.166	covered_nt	0	412	412
COX7A2L	hits	1.000	5.000	6.000	conv	2	57	59	density	0.369	4.624	4.993	covered_nt	28	264	292
KIF23	hits	1.0000	5.0000	6.0000	conv	2	57	59	density	0.115	4.68	4.796	covered_nt	25	286	311
DUSP14	hits	0.000	8.000	8.000	conv	0	59	59	density	0	4.768	4.768	covered_nt	0	396	396
NRSN2	hits	0.000	11.000	11.000	conv	0	59	59	density	0	4.687	4.687	covered_nt	0	591	591
CLPTM1L	hits	1.000	7.000	8.000	conv	4	55	59	density	0.164	4.492	4.657	covered_nt	30	462	492
CCDC85B	hits	0.000	5.000	5.000	conv	0	59	59	density	0	4.625	4.625	covered_nt	0	292	292
EIF2B1	hits	0.000	5.000	5.000	conv	0	59	59	density	0	4.515	4.515	covered_nt	0	409	409
UBL4A	hits	0.000	8.000	8.000	conv	0	59	59	density	0	4.512	4.512	covered_nt	0	503	503
TIMMDC1	hits	0.000	7.000	7.000	conv	0	59	59	density	0	4.452	4.452	covered_nt	0	333	333
HSPB11	hits	0.000	3.000	3.000	conv	0	59	59	density	0	4.376	4.376	covered_nt	0	119	119
BTBD6	hits	0.000	8.000	8.000	conv	0	59	59	density	0	4.376	4.376	covered_nt	0	393	393
THAP11	hits	0.000	8.000	8.000	conv	0	59	59	density	0	4.335	4.335	covered_nt	0	362	362
GDE1	hits	0.000	13.000	13.000	conv	0	59	59	density	0	4.284	4.284	covered_nt	0	543	543
TRIB3	hits	0.000	9.000	9.000	conv	0	59	59	density	0	4.283	4.283	covered_nt	0	453	453
SF3A2	hits	0.000	5.000	5.000	conv	0	59	59	density	0	4.167	4.167	covered_nt	0	280	280
PNMA1	hits	0.000	5.000	5.000	conv	0	59	59	density	0	4.097	4.097	covered_nt	0	426	426
ACBD6	hits	0.000	2.000	2.000	conv	0	59	59	density	0	3.963	3.963	covered_nt	0	236	236
CDKN1B	hits	0.000	8.000	8.000	conv	0	59	59	density	0	3.931	3.931	covered_nt	0	344	344
CTU1	hits	0.000	5.000	5.000	conv	0	59	59	density	0	3.817	3.817	covered_nt	0	276	276
CPSF6	hits	1.000	7.000	8.000	conv	4	55	59	density	0.244	2.379	2.623	covered_nt	52	278	330
CHD4	hits	0.000	7.000	7.000	conv	0	59	59	density	0	2.517	2.517	covered_nt	0	307	307
ALG3	hits	1.0000	7.0000	8.0000	conv	29	29	58	density	3.122	10.807	13.929	covered_nt	151	334	485
CFL2	hits	0.0000	12.0000	12.0000	conv	0	58	58	density	0	11.032	11.032	covered_nt	0	565	565
OST4	hits	1.000	2.000	3.000	conv	29	29	58	density	4.513	5.576	10.089	covered_nt	162	227	389
ID1	hits	0.0100	4.9900	5.0000	conv	0.188	57.812	58	density	0.724	8.921	9.645	covered_nt	1.564	490.436	492
SELS	hits	1.0300	6.9700	8.0000	conv	3.436	54.564	58	density	0.915	8.157	9.072	covered_nt	34.535	482.465	517
HINT2	hits	2.000	2.000	4.000	conv	30	28	58	density	4.358	4.583	8.942	covered_nt	280	150	430
MORF4L1	hits	0.0000	7.0000	7.0000	conv	0	58	58	density	0	6.277	6.277	covered_nt	0	294	294
ANAPC5	hits	0.0000	7.0000	7.0000	conv	0	58	58	density	0	5.928	5.928	covered_nt	0	339	339
PGLS	hits	0.000	5.000	5.000	conv	0	58	58	density	0	5.295	5.295	covered_nt	0	396	396
EXOSC2	hits	1.000	8.000	9.000	conv	2	56	58	density	0.375	4.527	4.901	covered_nt	27	484	511
PFDN1	hits	0.000	8.000	8.000	conv	0	58	58	density	0	4.884	4.884	covered_nt	0	378	378
HES1	hits	0.000	3.000	3.000	conv	0	58	58	density	0	4.87	4.87	covered_nt	0	413	413
SDHB	hits	0.000	5.000	5.000	conv	0	58	58	density	0	4.561	4.561	covered_nt	0	259	259
PMPCA	hits	1.000	7.000	8.000	conv	2	56	58	density	0.347	4.178	4.526	covered_nt	30	356	386
CCDC51	hits	0.000	3.000	3.000	conv	0	58	58	density	0	4.226	4.226	covered_nt	0	267	267
RPL39	hits	0.000	2.000	2.000	conv	0	58	58	density	0	4.222	4.222	covered_nt	0	71	71
RAB21	hits	2.000	7.000	9.000	conv	21	37	58	density	0.292	3.863	4.155	covered_nt	67	356	423
SERINC1	hits	0.000	9.000	9.000	conv	0	58	58	density	0	4.118	4.118	covered_nt	0	512	512
DNAJC8	hits	0.000	6.000	6.000	conv	0	58	58	density	0	4.1	4.1	covered_nt	0	285	285
TBCC	hits	0.000	7.000	7.000	conv	0	58	58	density	0	4.086	4.086	covered_nt	0	264	264
ANKLE2	hits	2.000	8.000	10.000	conv	4	54	58	density	0.261	3.584	3.845	covered_nt	63	490	553
FSTL1	hits	0.000	10.000	10.000	conv	0	58	58	density	0	3.523	3.523	covered_nt	0	403	403
IFIT5	hits	0.000	2.000	2.000	conv	0	58	58	density	0	2.34	2.34	covered_nt	0	164	164
C20orf29	hits	0.0000	6.0000	6.0000	conv	0	57.999	57.999	density	0	9.898	9.898	covered_nt	0	498	498
TMEM189	hits	0.0000	8.9700	8.9700	conv	0	57.807	57.807	density	0	9.36	9.36	covered_nt	0	537.21	537.21
SYNJ2BP-COX16	hits	0.0970	3.6430	3.7400	conv	1.187	56.485	57.672	density	0.014	7.116	7.13	covered_nt	8.807	241.275	250.082
GSTK1	hits	2.0000	4.0000	6.0000	conv	5	52	57	density	1.958	11.053	13.011	covered_nt	75	244	319
PEMT	hits	0.9990	3.0000	3.9990	conv	12	45	57	density	0.202	9.33	9.532	covered_nt	110.001	221.001	330.999
BAD	hits	0.0000	7.0000	7.0000	conv	0	57	57	density	0	8.602	8.602	covered_nt	0	408	408
HERPUD1	hits	0.9990	6.9990	8.0010	conv	3.999	53.001	57	density	0.389	7.634	8.025	covered_nt	27.999	312	339.999
SNHG6	hits	1.000	4.000	5.000	conv	16	41	57	density	1.691	5.577	7.267	covered_nt	70	221	291
MAGED2	hits	0.9990	3.0000	3.9990	conv	5.001	51.999	57	density	0.703	6.487	7.19	covered_nt	29.001	218.001	246.999
PABPC4	hits	0.0000	8.0010	8.0010	conv	0	57	57	density	0	6.711	6.711	covered_nt	0	351.999	351.999
JUP	hits	0.0200	4.9800	5.0000	conv	0.05	56.95	57	density	0.003	5.408	5.411	covered_nt	0.574	374.426	375
LOC550643	hits	0.000	4.000	4.000	conv	0	57	57	density	0	5.067	5.067	covered_nt	0	226	226
ANAPC10	hits	0.000	5.000	5.000	conv	0	57	57	density	0	4.993	4.993	covered_nt	0	269	269
ZMYND19	hits	0.000	6.000	6.000	conv	0	57	57	density	0	4.912	4.912	covered_nt	0	399	399
HOXA5	hits	0.000	7.000	7.000	conv	0	57	57	density	0	4.637	4.637	covered_nt	0	396	396
HDAC3	hits	0.000	5.000	5.000	conv	0	57	57	density	0	4.629	4.629	covered_nt	0	462	462
DERL2	hits	0.000	6.000	6.000	conv	0	57	57	density	0	4.607	4.607	covered_nt	0	263	263
TRABD	hits	0.000	9.000	9.000	conv	0	57	57	density	0	4.591	4.591	covered_nt	0	535	535
HSPA8	hits	0.0000	3.0000	3.0000	conv	0	57	57	density	0	4.532	4.532	covered_nt	0	158	158
EMG1	hits	0.000	4.000	4.000	conv	0	57	57	density	0	4.489	4.489	covered_nt	0	230	230
HNRNPA1	hits	0.0000	3.3340	3.3340	conv	0	57	57	density	0	4.444	4.444	covered_nt	0	135.334	135.334
PSMD6	hits	0.000	5.000	5.000	conv	0	57	57	density	0	4.435	4.435	covered_nt	0	270	270
ZDHHC12	hits	0.000	6.000	6.000	conv	0	57	57	density	0	4.297	4.297	covered_nt	0	215	215
RPL22	hits	0.000	7.000	7.000	conv	0	57	57	density	0	4.101	4.101	covered_nt	0	337	337
CLEC11A	hits	0.000	2.000	2.000	conv	0	57	57	density	0	4.024	4.024	covered_nt	0	215	215
YTHDF1	hits	0.000	9.000	9.000	conv	0	57	57	density	0	3.867	3.867	covered_nt	0	442	442
C11orf58	hits	0.000	9.000	9.000	conv	0	57	57	density	0	3.342	3.342	covered_nt	0	364	364
TM9SF2	hits	0.000	2.000	2.000	conv	0	57	57	density	0	3.1	3.1	covered_nt	0	181	181
POLR2B	hits	0.000	3.000	3.000	conv	0	57	57	density	0	3.045	3.045	covered_nt	0	272	272
ZCRB1	hits	0.000	3.000	3.000	conv	0	57	57	density	0	2.855	2.855	covered_nt	0	115	115
ZNF664	hits	0.0000	8.6260	8.6260	conv	0	56.06	56.06	density	0	5.721	5.721	covered_nt	0	538.378	538.378
GOLGA7	hits	0.0000	6.0000	6.0000	conv	0	56.001	56.001	density	0	8.245	8.245	covered_nt	0	333.999	333.999
IP6K2	hits	0.0100	9.9920	10.0020	conv	0.048	55.952	56	density	0.002	15.752	15.754	covered_nt	0.386	419.616	420.002
AGTRAP	hits	0.0000	7.0000	7.0000	conv	0	56	56	density	0	14.131	14.131	covered_nt	0	366	366
THYN1	hits	0.0000	2.0000	2.0000	conv	0	56	56	density	0	11.014	11.014	covered_nt	0	174	174
BEX4	hits	0.0000	5.0000	5.0000	conv	0	56	56	density	0	8.516	8.516	covered_nt	0	450	450
SLC35A2	hits	0.0200	4.9810	5.0000	conv	0.269	55.732	56	density	0.034	8.285	8.32	covered_nt	1.667	361.334	363
UNC119	hits	0.0000	7.0000	7.0000	conv	0	56	56	density	0	7.96	7.96	covered_nt	0	447	447
RNASEH2C	hits	1.000	6.000	7.000	conv	5	51	56	density	3.426	3.587	7.014	covered_nt	47	307	354
C1GALT1C1	hits	0.0000	3.0000	3.0000	conv	0	56	56	density	0	6.612	6.612	covered_nt	0	323	323
PVRL2	hits	0.0400	5.9600	6.0000	conv	0.406	55.594	56	density	0.008	6.029	6.037	covered_nt	2.366	363.634	366
CSNK1A1	hits	1.0000	8.0000	9.0000	conv	9	47	56	density	0.118	5.814	5.931	covered_nt	44	404	448
C9orf123	hits	1.000	6.000	7.000	conv	5	51	56	density	2.252	3.503	5.754	covered_nt	31	257	288
PPIA	hits	2.000	3.000	5.000	conv	23	33	56	density	1.956	3.665	5.621	covered_nt	121	266	387
POLR3D	hits	1.000	7.000	8.000	conv	3	53	56	density	1.336	4.144	5.48	covered_nt	63	322	385
TRAPPC2L	hits	0.000	3.000	3.000	conv	0	56	56	density	0	5.439	5.439	covered_nt	0	267	267
C19orf25	hits	1.000	5.000	6.000	conv	2	54	56	density	0.801	4.331	5.132	covered_nt	28	432	460
GNPDA1	hits	0.000	10.000	10.000	conv	0	56	56	density	0	4.645	4.645	covered_nt	0	552	552
ARF4	hits	0.000	8.000	8.000	conv	0	56	56	density	0	4.573	4.573	covered_nt	0	397	397
TFAM	hits	0.000	8.000	8.000	conv	0	56	56	density	0	4.52	4.52	covered_nt	0	425	425
PIH1D1	hits	0.000	4.000	4.000	conv	0	56	56	density	0	4.434	4.434	covered_nt	0	257	257
RPN1	hits	0.000	9.000	9.000	conv	0	56	56	density	0	4.31	4.31	covered_nt	0	441	441
MSX2	hits	0.000	8.000	8.000	conv	0	56	56	density	0	4.153	4.153	covered_nt	0	371	371
CARM1	hits	0.000	9.000	9.000	conv	0	56	56	density	0	4.084	4.084	covered_nt	0	474	474
TOE1	hits	0.000	4.000	4.000	conv	0	56	56	density	0	3.919	3.919	covered_nt	0	338	338
SUPT16H	hits	0.000	9.000	9.000	conv	0	56	56	density	0	3.35	3.35	covered_nt	0	431	431
NMT1	hits	0.000	7.000	7.000	conv	0	56	56	density	0	3.174	3.174	covered_nt	0	392	392
SMARCA5	hits	0.000	8.000	8.000	conv	0	56	56	density	0	2.139	2.139	covered_nt	0	270	270
SMUG1	hits	0.0800	12.9200	13.0000	conv	0.356	55.643	55.999	density	0.094	19.775	19.871	covered_nt	4.436	706.564	711
PELO	hits	0.000	3.960	3.960	conv	0	55.446	55.446	density	0	3.362	3.362	covered_nt	0	271.287	271.287
RPL23A	hits	1.010	6.000	7.010	conv	10.05	45	55.05	density	1.811	4.924	6.735	covered_nt	85.455	285	370.455
ATF3	hits	2.0020	7.9980	10.0000	conv	7.998	46.998	55.002	density	0.479	10.583	11.064	covered_nt	57.002	298.002	354.998
HMGA1	hits	0.0000	4.0020	4.0020	conv	0	55.002	55.002	density	0	9.837	9.837	covered_nt	0	252	252
NFYC	hits	0.0000	8.0000	8.0000	conv	0	55	55	density	0	11.224	11.224	covered_nt	0	398	398
OS9	hits	0.0000	7.0000	7.0000	conv	0	55	55	density	0	8.847	8.847	covered_nt	0	400	400
UBXN6	hits	1.0000	6.0000	7.0000	conv	2	53	55	density	0.409	7.208	7.616	covered_nt	29	416	445
BOD1	hits	0.0300	9.9700	10.0000	conv	0.129	54.871	55	density	0.018	7.483	7.501	covered_nt	0.98	464.02	465
SARS2	hits	1.0000	4.0000	5.0000	conv	8	47	55	density	0.952	6.204	7.155	covered_nt	106	313	419
DOHH	hits	0.0000	4.0000	4.0000	conv	0	55	55	density	0	6.629	6.629	covered_nt	0	337	337
ATG9A	hits	0.0000	9.0000	9.0000	conv	0	55	55	density	0	5.515	5.515	covered_nt	0	432	432
AP2A1	hits	0.0000	6.0000	6.0000	conv	0	55	55	density	0	5.227	5.227	covered_nt	0	355	355
CIB1	hits	0.000	3.000	3.000	conv	0	55	55	density	0	5.084	5.084	covered_nt	0	322	322
TOMM7	hits	0.000	5.000	5.000	conv	0	55	55	density	0	5.078	5.078	covered_nt	0	239	239
PSMA6	hits	0.000	6.000	6.000	conv	0	55	55	density	0	4.89	4.89	covered_nt	0	292	292
TSPAN31	hits	0.000	5.000	5.000	conv	0	55	55	density	0	4.68	4.68	covered_nt	0	429	429
DTX3	hits	0.000	7.000	7.000	conv	0	55	55	density	0	4.677	4.677	covered_nt	0	499	499
ORMDL2	hits	0.000	6.000	6.000	conv	0	55	55	density	0	4.443	4.443	covered_nt	0	277	277
MRPL45	hits	0.000	5.000	5.000	conv	0	55	55	density	0	4.408	4.408	covered_nt	0	345	345
ATP1B1	hits	0.000	8.000	8.000	conv	0	55	55	density	0	4.366	4.366	covered_nt	0	432	432
PPCDC	hits	1.000	6.000	7.000	conv	3	52	55	density	0.19	4.158	4.347	covered_nt	35	374	409
B3GNT1	hits	0.000	6.000	6.000	conv	0	55	55	density	0	4.245	4.245	covered_nt	0	372	372
ZC3HC1	hits	0.000	4.000	4.000	conv	0	55	55	density	0	4.103	4.103	covered_nt	0	310	310
SMARCE1	hits	2.000	4.000	6.000	conv	4	51	55	density	0.577	3.232	3.809	covered_nt	87	203	290
TOMM70A	hits	0.000	9.000	9.000	conv	0	55	55	density	0	3.291	3.291	covered_nt	0	385	385
SNRNP200	hits	0.000	4.000	4.000	conv	0	55	55	density	0	2.385	2.385	covered_nt	0	305	305
C15orf23	hits	0.0000	6.0000	6.0000	conv	0	54.999	54.999	density	0	9.041	9.041	covered_nt	0	387	387
CDK16	hits	0.9990	12.0000	12.9990	conv	2.001	53.001	54.999	density	0.548	8.371	8.92	covered_nt	24.999	558	582.999
VDAC1	hits	0.9990	3.9990	5.0010	conv	3.999	51	54.999	density	0.137	5.511	5.649	covered_nt	30	158.001	188.001
C17orf49	hits	0.0030	4.4140	4.4170	conv	0.017	54.322	54.339	density	0.014	11.67	11.684	covered_nt	0.193	360.288	360.481
HOXC4	hits	0.0250	6.0000	6.0250	conv	0.128	54	54.128	density	0.003	6.39	6.393	covered_nt	0.823	319	319.823
PRKAG1	hits	0.0000	3.9990	3.9990	conv	0	54	54	density	0	9.635	9.635	covered_nt	0	440.001	440.001
SPG21	hits	0.9990	6.9990	8.0010	conv	3.999	50.001	54	density	0.208	9.392	9.6	covered_nt	36.999	398.001	435
LAMTOR2	hits	0.0100	4.9900	5.0000	conv	0.03	53.97	54	density	0.02	9.171	9.19	covered_nt	0.436	295.564	296
NUDT16L1	hits	0.0000	5.0000	5.0000	conv	0	54	54	density	0	8.154	8.154	covered_nt	0	440	440
NSFL1C	hits	0.0000	6.0000	6.0000	conv	0	54	54	density	0	7.564	7.564	covered_nt	0	379	379
METTL17	hits	0.0100	4.9900	5.0000	conv	0.03	53.97	54	density	0.006	6.788	6.794	covered_nt	0.238	333.762	334
RAD23B	hits	0.0000	11.0010	11.0010	conv	0	54	54	density	0	6.247	6.247	covered_nt	0	383.001	383.001
NSDHL	hits	0.0000	4.0000	4.0000	conv	0	54	54	density	0	6.115	6.115	covered_nt	0	234	234
PKN1	hits	0.0000	6.0000	6.0000	conv	0	54	54	density	0	6.054	6.054	covered_nt	0	431	431
TPT1	hits	1.000	4.000	5.000	conv	2	52	54	density	0.938	5.098	6.036	covered_nt	29	276	305
HIST1H4H	hits	0.000	2.000	2.000	conv	0	54	54	density	0	6.034	6.034	covered_nt	0	242	242
TRAPPC6A	hits	1.000	5.000	6.000	conv	3	51	54	density	0.412	5.162	5.574	covered_nt	48	277	325
CDCA4	hits	0.0400	5.9600	6.0000	conv	0.446	53.554	54	density	0.036	5.401	5.437	covered_nt	2.416	331.584	334
RAD1	hits	1.0000	6.0000	7.0000	conv	3	51	54	density	0.565	4.871	5.435	covered_nt	25	406	431
DPYSL2	hits	0.0000	5.0010	5.0010	conv	0	54	54	density	0	5.243	5.243	covered_nt	0	318.999	318.999
AP3D1	hits	0.0000	7.0000	7.0000	conv	0	54	54	density	0	5.179	5.179	covered_nt	0	482	482
NOC4L	hits	1.000	3.000	4.000	conv	39	15	54	density	1.925	3.113	5.038	covered_nt	178	125	303
RPS25	hits	0.000	4.000	4.000	conv	0	54	54	density	0	4.958	4.958	covered_nt	0	148	148
C12orf10	hits	0.000	5.000	5.000	conv	0	54	54	density	0	4.876	4.876	covered_nt	0	345	345
ZNF511	hits	0.000	4.000	4.000	conv	0	54	54	density	0	4.817	4.817	covered_nt	0	294	294
HEBP2	hits	0.000	6.000	6.000	conv	0	54	54	density	0	4.635	4.635	covered_nt	0	306	306
MRPS10	hits	0.000	8.000	8.000	conv	0	54	54	density	0	4.448	4.448	covered_nt	0	446	446
DUS1L	hits	1.000	3.000	4.000	conv	3	51	54	density	0.595	3.725	4.321	covered_nt	31	228	259
TH1L	hits	0.000	3.000	3.000	conv	0	54	54	density	0	4.202	4.202	covered_nt	0	393	393
C7orf73	hits	0.000	7.000	7.000	conv	0	54	54	density	0	4.177	4.177	covered_nt	0	427	427
DUSP3	hits	0.000	14.000	14.000	conv	0	54	54	density	0	4.021	4.021	covered_nt	0	628	628
DYNC1LI1	hits	0.000	8.000	8.000	conv	0	54	54	density	0	3.881	3.881	covered_nt	0	344	344
HKR1	hits	1.000	9.000	10.000	conv	3	51	54	density	0.128	3.728	3.857	covered_nt	25	359	384
SLC39A3	hits	0.0000	2.0000	2.0000	conv	0	54	54	density	0	3.805	3.805	covered_nt	0	185	185
COX15	hits	0.0200	6.9800	7.0000	conv	0.406	53.594	54	density	0.022	3.77	3.792	covered_nt	2.713	451.287	454
HSPA4	hits	0.000	5.000	5.000	conv	0	54	54	density	0	3.629	3.629	covered_nt	0	385	385
WDR6	hits	0.000	7.000	7.000	conv	0	54	54	density	0	3.549	3.549	covered_nt	0	456	456
C5orf51	hits	0.000	9.000	9.000	conv	0	54	54	density	0	3.189	3.189	covered_nt	0	424	424
GNAI3	hits	0.000	6.000	6.000	conv	0	54	54	density	0	2.925	2.925	covered_nt	0	312	312
RPL17	hits	1.7510	4.2770	6.0270	conv	10.382	42.901	53.28	density	2.654	13.913	16.566	covered_nt	66.425	226.398	292.824
OTUD5	hits	0.0100	9.9900	10.0010	conv	0.04	52.96	53.001	density	0.002	10.91	10.912	covered_nt	0.442	615.558	616
KLC1	hits	1.0590	4.9420	5.9990	conv	7.745	45.256	53.001	density	0.141	5.878	6.019	covered_nt	64.059	342.941	407
BNIP1	hits	0.0000	6.0000	6.0000	conv	0	53	53	density	0	12.915	12.915	covered_nt	0	425	425
BEX2	hits	0.0000	4.0000	4.0000	conv	0	53	53	density	0	12.384	12.384	covered_nt	0	292	292
C4orf48	hits	1.0000	1.0000	2.0000	conv	16	37	53	density	4.012	7.401	11.414	covered_nt	90	110	200
ATPAF1	hits	1.0030	5.9960	6.9990	conv	9.017	43.983	53	density	0.454	10.835	11.289	covered_nt	99.196	384.803	483.999
LMNA	hits	0.0200	6.9810	6.9990	conv	0.648	52.352	53	density	0.026	7.618	7.643	covered_nt	3.902	422.099	426.001
RDH11	hits	0.0000	9.0000	9.0000	conv	0	53	53	density	0	7.348	7.348	covered_nt	0	579	579
EIF1B	hits	1.000	4.000	5.000	conv	9	44	53	density	2.445	4.795	7.24	covered_nt	77	271	348
DHRS2	hits	0.0000	4.0000	4.0000	conv	0	53	53	density	0	7.197	7.197	covered_nt	0	374	374
CCDC43	hits	3.0000	7.0000	10.0000	conv	12	41	53	density	1.089	5.738	6.826	covered_nt	94	266	360
LSM5	hits	0.0100	1.9900	2.0000	conv	0.03	52.97	53	density	0.008	6.794	6.803	covered_nt	0.466	223.534	224
PDCD5	hits	1.000	1.000	2.000	conv	9	44	53	density	0.872	4.512	5.384	covered_nt	47	132	179
C9orf142	hits	0.000	4.000	4.000	conv	0	53	53	density	0	5.201	5.201	covered_nt	0	291	291
SHMT1	hits	0.0000	4.0000	4.0000	conv	0	53	53	density	0	5.029	5.029	covered_nt	0	232	232
CDC34	hits	0.000	3.000	3.000	conv	0	53	53	density	0	4.751	4.751	covered_nt	0	375	375
DAP	hits	0.000	7.000	7.000	conv	0	53	53	density	0	4.618	4.618	covered_nt	0	552	552
C9orf78	hits	0.000	7.000	7.000	conv	0	53	53	density	0	4.577	4.577	covered_nt	0	416	416
PSMD7	hits	0.000	5.000	5.000	conv	0	53	53	density	0	4.525	4.525	covered_nt	0	368	368
PPA1	hits	0.000	5.000	5.000	conv	0	53	53	density	0	4.227	4.227	covered_nt	0	231	231
ZNF503	hits	0.000	8.000	8.000	conv	0	53	53	density	0	3.85	3.85	covered_nt	0	427	427
C16orf53	hits	0.000	8.000	8.000	conv	0	53	53	density	0	3.812	3.812	covered_nt	0	499	499
ENOPH1	hits	0.000	7.000	7.000	conv	0	53	53	density	0	3.696	3.696	covered_nt	0	241	241
LRWD1	hits	0.000	5.000	5.000	conv	0	53	53	density	0	3.569	3.569	covered_nt	0	239	239
ARL8B	hits	0.000	5.000	5.000	conv	0	53	53	density	0	3.542	3.542	covered_nt	0	318	318
HMGA2	hits	1.0000	5.0000	6.0000	conv	6	47	53	density	0.036	3.361	3.397	covered_nt	35	384	419
PMPCB	hits	0.000	7.000	7.000	conv	0	53	53	density	0	3.066	3.066	covered_nt	0	289	289
FASTKD5	hits	0.000	2.941	2.941	conv	0	52.941	52.941	density	0	3.262	3.262	covered_nt	0	246.078	246.078
NUP62	hits	0.0000	10.9800	10.9800	conv	0	52.895	52.895	density	0	10.647	10.647	covered_nt	0	562.875	562.875
RPL17-C18ORF32	hits	0.3240	1.8250	2.1490	conv	2.251	50.234	52.485	density	0.201	5.686	5.887	covered_nt	13.086	249.045	262.131
OCIAD1	hits	1.0020	1.9980	3.0000	conv	3	49.002	52.002	density	0.15	12.471	12.621	covered_nt	30	379.002	409.002
HMOX2	hits	0.0000	6.0000	6.0000	conv	0	52	52	density	0	10.349	10.349	covered_nt	0	353	353
NDUFV1	hits	1.0000	7.0000	8.0000	conv	29	23	52	density	3.026	6.659	9.684	covered_nt	151	293	444
PI4KB	hits	0.0000	8.0000	8.0000	conv	0	52	52	density	0	8.645	8.645	covered_nt	0	523	523
AGPAT2	hits	0.0100	5.9900	6.0000	conv	0.059	51.941	52	density	0.006	7.573	7.579	covered_nt	0.525	387.475	388
SNX11	hits	0.0000	10.0000	10.0000	conv	0	52	52	density	0	7.165	7.165	covered_nt	0	518	518
MED27	hits	0.0000	5.0000	5.0000	conv	0	52	52	density	0	7.129	7.129	covered_nt	0	293	293
AAAS	hits	0.0000	6.0000	6.0000	conv	0	52	52	density	0	7.085	7.085	covered_nt	0	381	381
COCH	hits	0.0000	10.0000	10.0000	conv	0	52	52	density	0	6.86	6.86	covered_nt	0	531	531
TRIP13	hits	0.0000	10.0000	10.0000	conv	0	52	52	density	0	6.365	6.365	covered_nt	0	474	474
SHFM1	hits	0.000	4.000	4.000	conv	0	52	52	density	0	5.266	5.266	covered_nt	0	187	187
BCL7C	hits	0.000	4.000	4.000	conv	0	52	52	density	0	5.244	5.244	covered_nt	0	317	317
DDAH1	hits	0.0000	8.0000	8.0000	conv	0	52	52	density	0	5.21	5.21	covered_nt	0	407	407
SRI	hits	0.0000	2.0000	2.0000	conv	0	52	52	density	0	5.155	5.155	covered_nt	0	199	199
HEBP1	hits	1.000	4.000	5.000	conv	3	49	52	density	0.195	4.806	5	covered_nt	35	326	361
CMC1	hits	0.000	2.000	2.000	conv	0	52	52	density	0	4.815	4.815	covered_nt	0	170	170
FUCA2	hits	1.000	8.000	9.000	conv	5	47	52	density	0.404	4.209	4.614	covered_nt	47	446	493
DAPK3	hits	0.000	7.000	7.000	conv	0	52	52	density	0	4.147	4.147	covered_nt	0	352	352
GTF2B	hits	0.000	4.000	4.000	conv	0	52	52	density	0	4.091	4.091	covered_nt	0	264	264
MAGEF1	hits	0.000	4.000	4.000	conv	0	52	52	density	0	4.05	4.05	covered_nt	0	262	262
AAGAB	hits	0.000	5.000	5.000	conv	0	52	52	density	0	4.013	4.013	covered_nt	0	431	431
ZNF622	hits	0.000	3.000	3.000	conv	0	52	52	density	0	4.006	4.006	covered_nt	0	255	255
PINK1	hits	0.000	6.000	6.000	conv	0	52	52	density	0	3.923	3.923	covered_nt	0	377	377
PRPF38A	hits	0.000	8.000	8.000	conv	0	52	52	density	0	3.809	3.809	covered_nt	0	361	361
CHERP	hits	0.000	10.000	10.000	conv	0	52	52	density	0	3.63	3.63	covered_nt	0	466	466
PPP6R1	hits	0.000	6.000	6.000	conv	0	52	52	density	0	3.527	3.527	covered_nt	0	383	383
STARD7	hits	0.000	8.000	8.000	conv	0	52	52	density	0	3.392	3.392	covered_nt	0	321	321
PNN	hits	0.000	6.000	6.000	conv	0	52	52	density	0	3.335	3.335	covered_nt	0	328	328
MKI67	hits	0.0000	8.0000	8.0000	conv	0	52	52	density	0	3.246	3.246	covered_nt	0	497	497
FLII	hits	2.000	2.000	4.000	conv	9	43	52	density	1.004	2.188	3.192	covered_nt	98	148	246
DPP9	hits	2.000	7.000	9.000	conv	15	37	52	density	0.33	2.816	3.146	covered_nt	114	258	372
EDC4	hits	0.000	6.000	6.000	conv	0	52	52	density	0	2.83	2.83	covered_nt	0	294	294
PPHLN1	hits	1.0080	4.9900	5.9980	conv	2.164	49.835	51.999	density	0.035	11.881	11.916	covered_nt	26.752	280.245	306.997
AP1B1	hits	0.0000	5.0010	5.0010	conv	0	51.999	51.999	density	0	5.044	5.044	covered_nt	0	273.999	273.999
SCAMP4	hits	0.050	12.000	12.050	conv	0.218	51	51.218	density	0.023	4.35	4.373	covered_nt	2.901	490	492.901
SLC35C2	hits	0.0000	6.9990	6.9990	conv	0	51	51	density	0	9.398	9.398	covered_nt	0	537.999	537.999
PSMC3IP	hits	0.0000	6.0000	6.0000	conv	0	51	51	density	0	8.505	8.505	covered_nt	0	483	483
C1orf31	hits	0.0000	3.0000	3.0000	conv	0	51	51	density	0	8.059	8.059	covered_nt	0	206	206
AIMP1	hits	0.0000	6.0000	6.0000	conv	0	51	51	density	0	7.432	7.432	covered_nt	0	375	375
CHMP2A	hits	0.0000	5.0000	5.0000	conv	0	51	51	density	0	7.349	7.349	covered_nt	0	213	213
ING3	hits	0.0300	6.9700	7.0000	conv	0.347	50.653	51	density	0.015	7.221	7.236	covered_nt	2.406	377.594	380
HMBS	hits	0.0000	5.0000	5.0000	conv	0	51	51	density	0	7.233	7.233	covered_nt	0	329	329
SIRT6	hits	0.0000	4.0000	4.0000	conv	0	51	51	density	0	6.712	6.712	covered_nt	0	295	295
FAM125A	hits	1.000	6.000	7.000	conv	2	49	51	density	0.581	4.844	5.425	covered_nt	20	331	351
PPP1CB	hits	1.0000	12.0000	13.0000	conv	3	48	51	density	0.074	5.104	5.178	covered_nt	24	475	499
HIST1H2BJ	hits	0.000	4.000	4.000	conv	0	51	51	density	0	5.164	5.164	covered_nt	0	168	168
MRPS6	hits	1.000	3.500	4.500	conv	2	49	51	density	0.037	4.656	4.694	covered_nt	18	240	258
SLC25A10	hits	0.000	6.000	6.000	conv	0	51	51	density	0	4.537	4.537	covered_nt	0	419	419
RPS27L	hits	0.000	4.000	4.000	conv	0	51	51	density	0	4.478	4.478	covered_nt	0	231	231
RPL4	hits	0.000	7.000	7.000	conv	0	51	51	density	0	4.245	4.245	covered_nt	0	259	259
MOGS	hits	0.0000	5.0000	5.0000	conv	0	51	51	density	0	4.209	4.209	covered_nt	0	180	180
PPP2CB	hits	0.000	8.000	8.000	conv	0	51	51	density	0	4.055	4.055	covered_nt	0	308	308
MGST3	hits	1.000	5.000	6.000	conv	2	49	51	density	0.133	3.858	3.991	covered_nt	23	205	228
FAF1	hits	0.000	7.000	7.000	conv	0	51	51	density	0	3.941	3.941	covered_nt	0	371	371
SNX2	hits	0.000	5.000	5.000	conv	0	51	51	density	0	3.792	3.792	covered_nt	0	266	266
EIF4A2	hits	0.000	5.000	5.000	conv	0	51	51	density	0	3.747	3.747	covered_nt	0	235	235
TSPYL2	hits	0.000	4.000	4.000	conv	0	51	51	density	0	3.71	3.71	covered_nt	0	342	342
GLTSCR2	hits	1.000	3.000	4.000	conv	2	49	51	density	0.345	3.302	3.647	covered_nt	27	135	162
APEH	hits	0.000	4.000	4.000	conv	0	51	51	density	0	3.305	3.305	covered_nt	0	245	245
GATAD2B	hits	1.000	8.000	9.000	conv	6	45	51	density	0.081	2.673	2.754	covered_nt	64	402	466
NAA38	hits	0.000	3.000	3.000	conv	0	51	51	density	0	1.764	1.764	covered_nt	0	300	300
HSPE1	hits	0.000	1.980	1.980	conv	0	50.495	50.495	density	0	3.622	3.622	covered_nt	0	107.921	107.921
TGIF2-C20ORF24	hits	0.202	0.849	1.052	conv	18.005	32.464	50.469	density	0.154	3.223	3.376	covered_nt	41.457	90.93	132.388
TCEB1	hits	0.0000	7.0020	7.0020	conv	0	50.004	50.004	density	0	12.72	12.72	covered_nt	0	307.998	307.998
TMUB2	hits	0.0000	9.0000	9.0000	conv	0	50.001	50.001	density	0	9.193	9.193	covered_nt	0	464.001	464.001
U2AF1L4	hits	2.0000	3.0000	5.0000	conv	13	37	50	density	4.234	7.763	11.997	covered_nt	144	207	351
RAD51	hits	0.0000	9.0000	9.0000	conv	0	50	50	density	0	9.541	9.541	covered_nt	0	377	377
CENPA	hits	0.0100	6.9900	7.0000	conv	0.069	49.931	50	density	0.013	8.24	8.254	covered_nt	0.673	460.327	461
RSRC2	hits	0.0000	5.0000	5.0000	conv	0	50	50	density	0	8	8	covered_nt	0	288	288
CBY1	hits	0.0000	6.0000	6.0000	conv	0	50	50	density	0	7.546	7.546	covered_nt	0	304	304
NRGN	hits	0.0000	6.0000	6.0000	conv	0	50	50	density	0	7.325	7.325	covered_nt	0	284	284
CDK5RAP1	hits	1.0000	3.0000	4.0000	conv	3	47	50	density	0.108	5.488	5.596	covered_nt	31	230	261
DPCD	hits	1.000	7.000	8.000	conv	2	48	50	density	0.215	5.358	5.573	covered_nt	33	320	353
HIRIP3	hits	0.0000	3.0000	3.0000	conv	0	50	50	density	0	5.189	5.189	covered_nt	0	255	255
TTC9C	hits	0.000	4.000	4.000	conv	0	50	50	density	0	4.748	4.748	covered_nt	0	295	295
ADI1	hits	0.000	6.000	6.000	conv	0	50	50	density	0	4.706	4.706	covered_nt	0	421	421
FKBP3	hits	0.000	6.000	6.000	conv	0	50	50	density	0	4.688	4.688	covered_nt	0	334	334
MRPL50	hits	0.000	4.000	4.000	conv	0	50	50	density	0	4.416	4.416	covered_nt	0	208	208
EID2	hits	0.000	4.000	4.000	conv	0	50	50	density	0	4.384	4.384	covered_nt	0	277	277
MAPRE1	hits	1.000	9.000	10.000	conv	2	48	50	density	0.129	4.164	4.292	covered_nt	26	444	470
RRP12	hits	0.0000	1.0000	1.0000	conv	0	50	50	density	0	4.261	4.261	covered_nt	0	293	293
NR2F6	hits	0.000	4.000	4.000	conv	0	50	50	density	0	4.24	4.24	covered_nt	0	323	323
GGH	hits	0.000	2.000	2.000	conv	0	50	50	density	0	4.16	4.16	covered_nt	0	252	252
SMNDC1	hits	0.000	6.000	6.000	conv	0	50	50	density	0	4.146	4.146	covered_nt	0	339	339
TSC22D4	hits	0.000	5.000	5.000	conv	0	50	50	density	0	3.99	3.99	covered_nt	0	355	355
DNAJB1	hits	0.000	7.000	7.000	conv	0	50	50	density	0	3.846	3.846	covered_nt	0	299	299
C5orf22	hits	0.000	7.000	7.000	conv	0	50	50	density	0	3.655	3.655	covered_nt	0	419	419
PELP1	hits	0.000	8.000	8.000	conv	0	50	50	density	0	3.632	3.632	covered_nt	0	419	419
TRAP1	hits	0.000	2.000	2.000	conv	0	50	50	density	0	3.566	3.566	covered_nt	0	249	249
DHX37	hits	0.000	6.000	6.000	conv	0	50	50	density	0	3.342	3.342	covered_nt	0	416	416
LMO4	hits	0.000	10.000	10.000	conv	0	50	50	density	0	3.12	3.12	covered_nt	0	416	416
SNRPE	hits	0.000	2.000	2.000	conv	0	50	50	density	0	3.053	3.053	covered_nt	0	113	113
CSTF2T	hits	0.000	5.000	5.000	conv	0	50	50	density	0	3.001	3.001	covered_nt	0	288	288
CENPF	hits	0.000	6.000	6.000	conv	0	50	50	density	0	2.391	2.391	covered_nt	0	437	437
RBFOX2	hits	0.0000	4.9980	4.9980	conv	0	49.998	49.998	density	0	3.547	3.547	covered_nt	0	211.002	211.002
NIPA2	hits	0.0000	7.0020	7.0020	conv	0	49.002	49.002	density	0	8.627	8.627	covered_nt	0	322.002	322.002
PQBP1	hits	0.0020	2.9990	3.0010	conv	0.007	48.993	49.001	density	0.003	18.84	18.843	covered_nt	0.086	269.917	270.003
SLC39A14	hits	0.0300	9.9700	10.0000	conv	0.156	48.845	49.001	density	0.004	7.257	7.26	covered_nt	1.585	516.416	518.001
IFI27L1	hits	0.0000	4.0000	4.0000	conv	0	49	49	density	0	7.842	7.842	covered_nt	0	196	196
REPIN1	hits	0.0000	7.0000	7.0000	conv	0	49	49	density	0	7.716	7.716	covered_nt	0	345	345
ATP5A1	hits	0.0000	8.0000	8.0000	conv	0	49	49	density	0	6.503	6.503	covered_nt	0	327	327
GLA	hits	3.000	7.000	10.000	conv	14	35	49	density	1.398	4.491	5.889	covered_nt	144	305	449
PLEKHB2	hits	0.0000	11.0000	11.0000	conv	0	49	49	density	0	5.463	5.463	covered_nt	0	486	486
NCAPH2	hits	0.0000	6.0000	6.0000	conv	0	49	49	density	0	5.406	5.406	covered_nt	0	369	369
PRAF2	hits	0.000	8.000	8.000	conv	0	49	49	density	0	5.267	5.267	covered_nt	0	474	474
MORN2	hits	0.000	6.000	6.000	conv	0	49	49	density	0	5.024	5.024	covered_nt	0	234	234
SMC4	hits	0.0000	11.0000	11.0000	conv	0	49	49	density	0	4.973	4.973	covered_nt	0	479	479
CLNS1A	hits	1.000	8.000	9.000	conv	2	47	49	density	0.205	4.518	4.723	covered_nt	31	301	332
TPRG1L	hits	0.000	9.000	9.000	conv	0	49	49	density	0	4.336	4.336	covered_nt	0	466	466
RNPEP	hits	0.000	5.000	5.000	conv	0	49	49	density	0	4.323	4.323	covered_nt	0	459	459
TARDBP	hits	1.000	10.000	11.000	conv	3	46	49	density	0.74	3.579	4.319	covered_nt	58	462	520
NUCB1	hits	0.000	10.000	10.000	conv	0	49	49	density	0	4.149	4.149	covered_nt	0	432	432
FUNDC1	hits	0.000	4.000	4.000	conv	0	49	49	density	0	4.135	4.135	covered_nt	0	194	194
TERF2IP	hits	0.000	5.000	5.000	conv	0	49	49	density	0	4.123	4.123	covered_nt	0	358	358
ARL2BP	hits	0.000	7.000	7.000	conv	0	49	49	density	0	4.058	4.058	covered_nt	0	329	329
PHF23	hits	0.000	5.000	5.000	conv	0	49	49	density	0	3.979	3.979	covered_nt	0	301	301
LRP3	hits	0.000	9.000	9.000	conv	0	49	49	density	0	3.894	3.894	covered_nt	0	513	513
ALDH9A1	hits	0.000	6.000	6.000	conv	0	49	49	density	0	3.871	3.871	covered_nt	0	341	341
GATAD2A	hits	0.000	12.000	12.000	conv	0	49	49	density	0	3.661	3.661	covered_nt	0	661	661
PSMD4	hits	0.000	3.000	3.000	conv	0	49	49	density	0	3.553	3.553	covered_nt	0	143	143
TNFRSF10D	hits	0.000	7.000	7.000	conv	0	49	49	density	0	3.405	3.405	covered_nt	0	339	339
TCEB3	hits	0.000	8.000	8.000	conv	0	49	49	density	0	3.178	3.178	covered_nt	0	398	398
KIF5B	hits	0.000	7.000	7.000	conv	0	49	49	density	0	2.996	2.996	covered_nt	0	411	411
TM9SF3	hits	0.000	9.000	9.000	conv	0	49	49	density	0	2.947	2.947	covered_nt	0	412	412
RRP1B	hits	1.000	6.000	7.000	conv	4	45	49	density	0.136	2.802	2.938	covered_nt	31	304	335
ATXN2L	hits	0.0400	7.9620	8.0020	conv	0.384	48.615	48.999	density	0.064	8.935	9	covered_nt	4.652	512.346	516.998
CBS	hits	0.0050	7.9950	8.0000	conv	0.055	48.945	48.999	density	0.003	8.603	8.607	covered_nt	0.473	477.527	477.999
HIF1A	hits	0.0000	3.9990	3.9990	conv	0	48.999	48.999	density	0	4.494	4.494	covered_nt	0	218.001	218.001
KIAA1191	hits	0.0050	7.9950	8.0000	conv	0.015	47.986	48.001	density	0.002	7.101	7.103	covered_nt	0.214	345.786	346
ECI2	hits	0.0000	3.0000	3.0000	conv	0	48	48	density	0	10.534	10.534	covered_nt	0	295	295
CTSA	hits	0.0000	8.0010	8.0010	conv	0	48	48	density	0	8.842	8.842	covered_nt	0	450.999	450.999
ETFB	hits	0.0000	5.0000	5.0000	conv	0	48	48	density	0	8.109	8.109	covered_nt	0	341	341
VDAC3	hits	0.0000	6.0000	6.0000	conv	0	48	48	density	0	7.686	7.686	covered_nt	0	411	411
ATP6V0A1	hits	0.0000	9.0000	9.0000	conv	0	48	48	density	0	6.822	6.822	covered_nt	0	476.001	476.001
SCRN1	hits	0.0000	7.0000	7.0000	conv	0	48	48	density	0	6.093	6.093	covered_nt	0	391	391
LGMN	hits	0.0000	6.0000	6.0000	conv	0	48	48	density	0	5.928	5.928	covered_nt	0	288	288
GPATCH4	hits	0.0100	2.9900	3.0000	conv	0.04	47.96	48	density	0.014	5.886	5.901	covered_nt	0.505	287.495	288
ACOT8	hits	2.000	4.000	6.000	conv	4	44	48	density	0.442	4.836	5.278	covered_nt	52	323	375
NTPCR	hits	0.000	4.000	4.000	conv	0	48	48	density	0	5.218	5.218	covered_nt	0	327	327
CSNK1D	hits	0.0000	5.0000	5.0000	conv	0	48	48	density	0	5.033	5.033	covered_nt	0	353	353
BAG2	hits	2.000	5.000	7.000	conv	8	40	48	density	0.765	3.969	4.735	covered_nt	76	301	377
MED11	hits	0.000	4.000	4.000	conv	0	48	48	density	0	4.709	4.709	covered_nt	0	209	209
RSL24D1	hits	0.000	7.000	7.000	conv	0	48	48	density	0	4.645	4.645	covered_nt	0	354	354
CBX1	hits	0.0000	4.0000	4.0000	conv	0	48	48	density	0	4.41	4.41	covered_nt	0	168	168
PHF6	hits	0.0000	7.0000	7.0000	conv	0	48	48	density	0	4.397	4.397	covered_nt	0	330	330
DLX2	hits	0.000	7.000	7.000	conv	0	48	48	density	0	4.238	4.238	covered_nt	0	412	412
VPS37B	hits	0.000	9.000	9.000	conv	0	48	48	density	0	3.941	3.941	covered_nt	0	395	395
ATP5F1	hits	0.000	6.000	6.000	conv	0	48	48	density	0	3.651	3.651	covered_nt	0	243	243
ERF	hits	0.000	6.000	6.000	conv	0	48	48	density	0	3.532	3.532	covered_nt	0	286	286
HP1BP3	hits	2.000	5.000	7.000	conv	8	40	48	density	0.179	3.243	3.422	covered_nt	53	332	385
MDK	hits	0.0000	5.0010	5.0010	conv	0	47.001	47.001	density	0	10.344	10.344	covered_nt	0	270.999	270.999
GADD45A	hits	0.0000	3.9990	3.9990	conv	0	47.001	47.001	density	0	8.73	8.73	covered_nt	0	246.999	246.999
RNF40	hits	0.0000	9.0000	9.0000	conv	0	47.001	47.001	density	0	5.861	5.861	covered_nt	0	510	510
RPL9	hits	1.0300	3.9700	5.0000	conv	26.158	20.842	47	density	1.443	7.152	8.595	covered_nt	49.931	255.069	305
EXOSC3	hits	0.0000	4.0000	4.0000	conv	0	47	47	density	0	7.248	7.248	covered_nt	0	259	259
MCAT	hits	1.0000	4.0000	5.0000	conv	7	40	47	density	0.994	6.156	7.15	covered_nt	76	290	366
NCBP2	hits	0.0000	8.0000	8.0000	conv	0	47	47	density	0	6.982	6.982	covered_nt	0	428	428
OAT	hits	0.0000	4.0000	4.0000	conv	0	47	47	density	0	6.905	6.905	covered_nt	0	393	393
COMMD9	hits	0.0000	7.0000	7.0000	conv	0	47	47	density	0	6.033	6.033	covered_nt	0	413	413
SRPR	hits	0.0000	7.0000	7.0000	conv	0	47	47	density	0	5.546	5.546	covered_nt	0	356	356
C7orf30	hits	0.000	5.000	5.000	conv	0	47	47	density	0	5.259	5.259	covered_nt	0	282	282
CNIH4	hits	0.000	2.000	2.000	conv	0	47	47	density	0	4.868	4.868	covered_nt	0	176	176
NUP37	hits	1.000	6.000	7.000	conv	2	45	47	density	0.103	4.689	4.792	covered_nt	32	299	331
MIS18A	hits	1.000	5.000	6.000	conv	2	45	47	density	0.381	4.31	4.69	covered_nt	28	296	324
UBE2Z	hits	1.000	11.000	12.000	conv	2	45	47	density	0.405	4.219	4.624	covered_nt	57	551	608
SH3GLB1	hits	0.0000	5.0000	5.0000	conv	0	47	47	density	0	4.517	4.517	covered_nt	0	303	303
AP2B1	hits	1.0000	9.0000	10.0000	conv	2	45	47	density	0.034	4.438	4.473	covered_nt	32	420	452
TRAM1	hits	1.000	8.000	9.000	conv	3	44	47	density	0.228	3.872	4.1	covered_nt	55	423	478
[truncated: 5,908 more rows]
